# Supplementary material for: Palladium photocatalysis: a strategic approach for visible-light-mediated C(sp 2 )–H arylation
Source: Royal Society of Chemistry journal article supplement (doi:10.1039/d5cc06747b), 2026-01-01
Supplement: d5cc06747b1.pdf [file d5cc06747b1.pdf]

## **Palladium Photocatalysis: A Strategic Approach for Visible-Light-Mediated C(sp)<sup>2</sup>-H Arylation**

Parag Mistry, Biprajit Paul, Vikas Ranga, Indranil Chatterjee\*

*\*Indian Institute of Technology Ropar*

*Ropar, Punjab-140001, India*

[indranil.chatterjee@iitrpr.ac.in](mailto:indranil.chatterjee@iitrpr.ac.in)

**Supporting Information**

**Table of Contents**

|            |                                                                                       |            |
|------------|---------------------------------------------------------------------------------------|------------|
| <b>1.</b>  | <b>General information</b>                                                            | <b>S3</b>  |
| <b>2.</b>  | <b>Preparation of starting materials</b>                                              | <b>S3</b>  |
|            | <b>2.1 General procedure 1 (GP-1)</b>                                                 | <b>S4</b>  |
| <b>3.</b>  | <b>List of starting materials</b>                                                     | <b>S4</b>  |
| <b>4.</b>  | <b>Optimization of reaction conditions (in detail)</b>                                | <b>S5</b>  |
| <b>5.</b>  | <b>Mechanistic studies</b>                                                            | <b>S12</b> |
|            | <b>5.1 Determination of Quantum yield</b>                                             | <b>S12</b> |
|            | <b>5.2 Luminescence Quenching experiment</b>                                          | <b>S15</b> |
|            | <b>5.3 Cyclic Voltammetry experiment</b>                                              | <b>S17</b> |
|            | <b>5.4 Independent kinetic isotope exchange (KIE) study</b>                           | <b>S17</b> |
|            | <b>5.5 Radical trap experiment</b>                                                    | <b>S20</b> |
| <b>6.</b>  | <b>1 mmol scale synthesis</b>                                                         | <b>S21</b> |
| <b>7.</b>  | <b>General procedure for the visible-light-mediated C(sp)<sup>2</sup>-H Arylation</b> | <b>S22</b> |
| <b>8.</b>  | <b>Experimental details for the synthesized compounds obtained from GP-2</b>          | <b>S22</b> |
| <b>9.</b>  | <b>Experimental NMR data</b>                                                          | <b>S48</b> |
| <b>10.</b> | <b>References</b>                                                                     | <b>S91</b> |

## 1. General information

Main Reactions were performed in oven-dried vial under open atmosphere with magnetic stirrer and 456 nm Kessil light as the source of light. Solvents and liquid chemicals were transferred by using syringes and micropipette. Commercially available technical grade solvents were dried as per standard procedure for reaction solvent and simply distilled for extraction or chromatography (ethyl acetate, hexane and dichloromethane) prior to use. Chemicals and catalysts were purchased from Sigma-Aldrich, Alfa-Aesar, TCI, GLR Innovations, BLDpharm and used without further purification. Reactions were monitored by thin-layer chromatography (TLC) performed on silica gel 60 F254 plates from Merck. Flash column chromatography was performed on silica gel 60 (40–63  $\mu\text{m}$ , 230–400 mesh, ASTM) from Merck using the indicated solvents.  $^1\text{H}$ ,  $^{13}\text{C}$ , and  $^{19}\text{F}$  NMR spectra recorded in  $\text{CDCl}_3$  unless otherwise stated on JEOL JNM ECS-400 instrument. Chemical shifts are reported in parts per million (ppm) and are referenced to the residual solvent resonance as the internal standard ( $\text{CDCl}_3$ :  $\delta = 7.26$  ppm for  $^1\text{H}$  NMR and  $\text{CDCl}_3$ :  $\delta = 77.16$  ppm for  $^{13}\text{C}$  NMR. Data are reported as follows: chemical shift, multiplicity (br = broad singlet, s = singlet, d = doublet, dd = doublet of doublets, t = triplet, q = quartet, m = multiplet), coupling constants (Hz), and integration. All the HRMS data were recorded on XEVO G2-XS QTOF.

## 2. Preparation of starting materials

Starting methyl 4-iodobenzoate were synthesized from corresponding Benzoic acids following GP-1. Iodobenzene derivatives were purchased directly from TCI, GLR Innovations, Sigma-Aldrich and BLDpharm. For others esterification the following procedure was used.

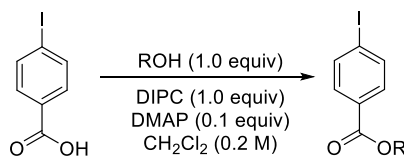

## 2.1 General procedure 1 (GP-1)

A round-bottom flask was charged with (if solid) carboxylic acid (1.0 equiv), (if solid) Alcohol (1.0 equiv) and DMAP (0.1 equiv). Dichloromethane was added (0.2 M), and the mixture was stirred vigorously. Alcohol (1.0 equiv) was added via syringe (if liquid) and the mixture was allowed to stir until the acid was consumed (determined by TLC). Typical reaction times were between 10 h to 16 h. The mixture was filtered and rinsed with additional  $\text{CH}_2\text{Cl}_2$ . The solvent was removed under reduced pressure, and purification by column chromatography afforded corresponding esters.

## 3. List of starting materials

### 3.1 List of successful iodobenzene derivatives for C-H functionalization

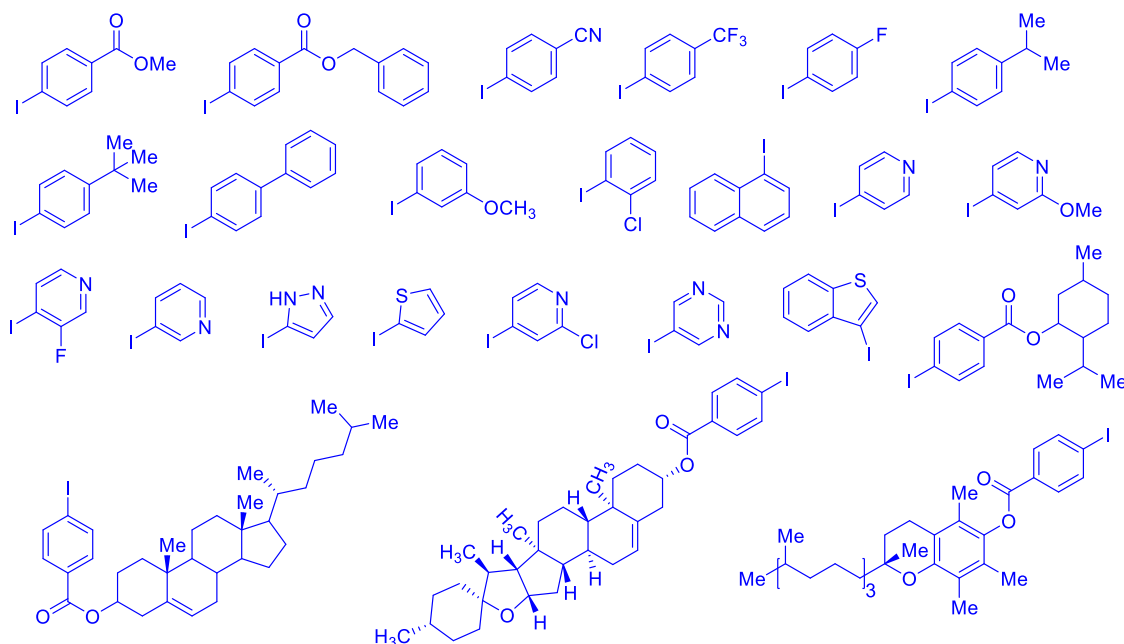

### 3.2 List of successful derivatives for C-H functionalization

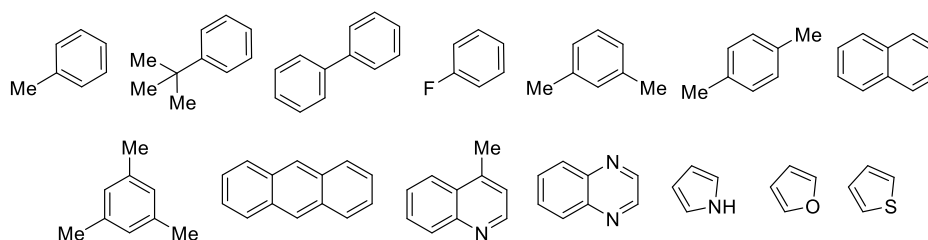

#### 4. Optimization of reaction conditions

**Table S1.** Optimization of light

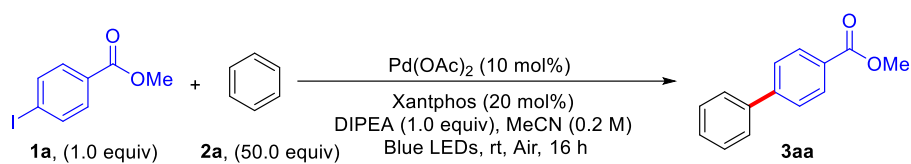

| Entry | Light source        | % Yield <sup>[a]</sup> |
|-------|---------------------|------------------------|
| 1     | 456 nm (Kessil)     | 52                     |
| 2     | 450 nm (Hepatochem) | 52                     |
| 3     | 455 nm (Yarev)      | 34                     |
| 4     | 427 nm (Kessil)     | 37                     |

[a] Reaction scale 0.1 mmol, yields reported are the isolated yield.

**Table S2.** Screening of bases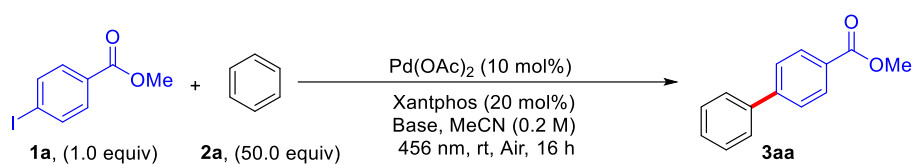

| Entry | Base (equiv)                          | % Yield <sup>[a]</sup> |
|-------|---------------------------------------|------------------------|
| 1     | DIPEA (2.0)                           | 64                     |
| 2     | DIPEA (3.0)                           | 50                     |
| 3     | DIPEA (1.0)                           | 52                     |
| 4     | DIPA (0.2)                            | 28                     |
| 5     | TMP (0.2)                             | 22                     |
| 6     | TMEDA (0.2)                           | 17                     |
| 7     | Collidine (0.2)                       | 0                      |
| 9     | <sup>t</sup> BuOK (0.2)               | 14                     |
| 10    | Cs <sub>2</sub> CO <sub>3</sub> (0.2) | 21                     |
| 11    | K <sub>2</sub> CO <sub>3</sub> (0.2)  | 9                      |
| 12    | K <sub>3</sub> PO <sub>4</sub> (0.2)  | 7                      |
| 13    | KOH (0.2)                             | 11                     |
| 14    | Et <sub>2</sub> NH (0.2)              | Trace                  |
| 15    | Ph <sub>2</sub> NH (0.2)              | 0                      |
| 16    | Diisobutylamine (0.2)                 | 7                      |
| 17    | Tert-Butylamine (0.2)                 | 0                      |
| 18    | Tribenzylamine (0.2)                  | 0                      |
| 19    | Morpholine (0.2)                      | 20                     |

[a] Reaction scale 0.1 mmol, yields reported are the isolated yield.

**Table S3.** Optimization of solvents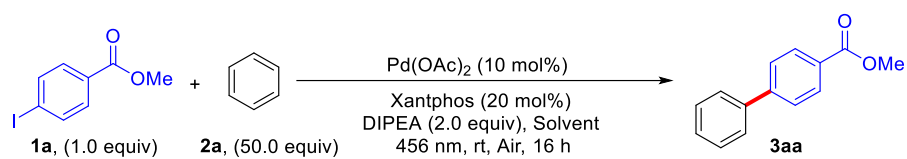

| Entry | Solvent (M)               | % Yield <sup>[a]</sup> |
|-------|---------------------------|------------------------|
| 1     | CH <sub>3</sub> CN (0.1)  | 68                     |
| 2     | CH <sub>3</sub> CN (0.2)  | 64                     |
| 3     | CH <sub>3</sub> CN (0.07) | 57                     |
| 4     | CH <sub>3</sub> CN (0.05) | 47                     |
| 5     | DMSO (0.1)                | 43                     |
| 6     | DME (0.1)                 | 10                     |
| 7     | DMA (0.1)                 | 0                      |
| 8     | DMF (0.1)                 | 0                      |
| 9     | THF (0.1)                 | 25                     |
| 10    | DCM (0.1)                 | 28                     |
| 11    | DCE (0.1)                 | 33                     |
| 12    | Acetone (0.1)             | 18                     |
| 13    | 1,4-Dioxane (0.1)         | Trace                  |
| 14    | EtOAc (0.1)               | 10                     |
| 15    | EtOH (0.1)                | 11                     |
| 16    | 1,2-DFB (0.1)             | 28                     |
| 17    | 1,2-DCB (0.1)             | Trace                  |

[a] Reaction scale 0.1 mmol, yields reported are the isolated yield.

**Table S4.** Screening of catalyst and catalyst loading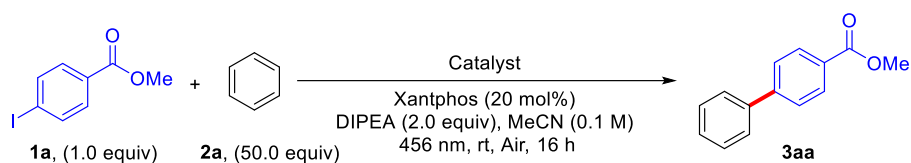

| Entry | Catalyst (mol %)                                                    | % Yield <sup>[a]</sup> |
|-------|---------------------------------------------------------------------|------------------------|
| 1     | Pd(OAc) <sub>2</sub> (10)                                           | 68                     |
| 2     | Pd(OAc) <sub>2</sub> (15)                                           | 68                     |
| 3     | Pd(OAc) <sub>2</sub> (7.5)                                          | 62                     |
| 4     | Pd(OAc) <sub>2</sub> (5)                                            | 56                     |
| 5     | Palladium pivalate (10)                                             | 38                     |
| 6     | PdCl <sub>2</sub> [P(cy) <sub>3</sub> ] <sub>2</sub> (10)           | Trace                  |
| 7     | Pd(PPh <sub>3</sub> ) <sub>4</sub> (10)                             | 57                     |
| 8     | PdCl <sub>2</sub> (PPh <sub>3</sub> ) <sub>2</sub> (10)             | 28                     |
| 9     | Pd <sub>2</sub> (dba) <sub>3</sub> (10)                             | 52                     |
| 10    | Pd(dppf)Cl <sub>2</sub> .CH <sub>2</sub> Cl <sub>2</sub> (10)       | Trace                  |
| 11    | X-Phos-PdG <sub>2</sub> (10)                                        | 25                     |
| 12    | Pd(dba) <sub>2</sub> (10)                                           | 50                     |
| 13    | Pd <sub>2</sub> (dba) <sub>3</sub> .CHCl <sub>3</sub> (10)          | 54                     |
| 14    | Pd(C <sub>5</sub> H <sub>7</sub> O <sub>2</sub> ) <sub>2</sub> (10) | Trace                  |

[a] Reaction scale 0.1 mmol, yields reported are the isolated yield.



**Table S5.** Screening of ligand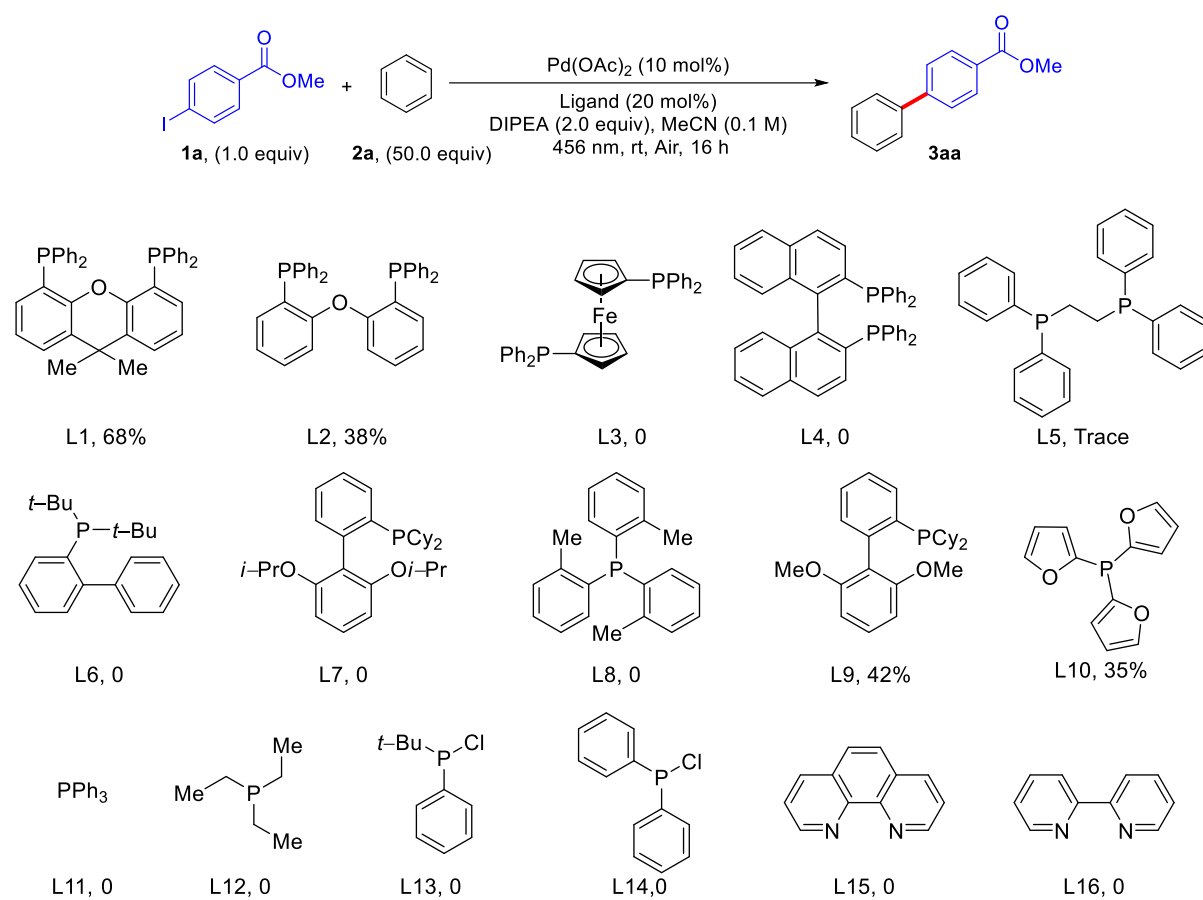

[a] Reaction scale 0.1 mmol, yields reported are the isolated yield.

**Table S6.** Optimization of equivalency of benzene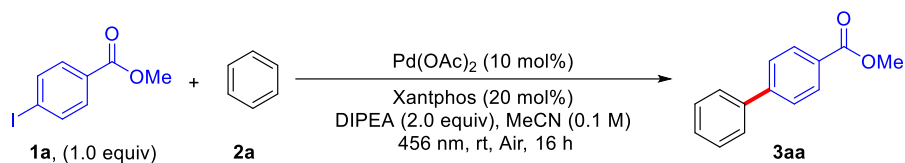

| Entry | Benzene (equiv) | % Yield <sup>[a]</sup> |
|-------|-----------------|------------------------|
| 1     | 50              | 68                     |
| 2     | 30              | 65                     |
| 3     | 20              | 60                     |
| 4     | 10              | 57                     |

[a] Reaction scale 0.1 mmol, yields reported are the isolated yield.

**Table S7.** Optimization of solvent concentration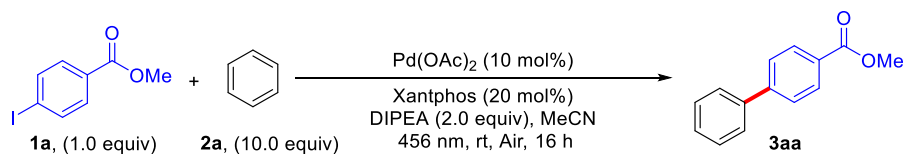

| Entry | Solvent (M) | % Yield <sup>[a]</sup> |
|-------|-------------|------------------------|
| 1     | 0.1         | 55                     |
| 2     | 0.13        | 55                     |
| 3     | 0.2         | 60                     |
| 4     | 0.4         | 60                     |

[a] Reaction scale 0.1 mmol, yields reported are the isolated yield.

**Table S8.** Screening of time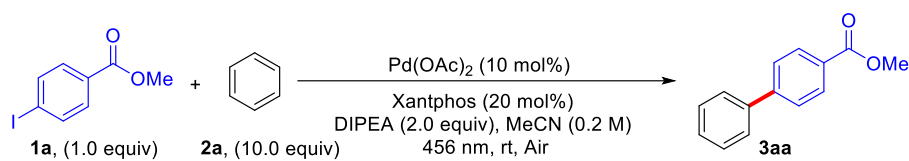

| Entry | Time (hour) | % Yield <sup>[a]</sup> |
|-------|-------------|------------------------|
| 1     | 16          | 50                     |
| 2     | 24          | 60                     |
| 3     | 30          | 70                     |
| 4     | 48          | 70                     |

[a] Reaction scale 0.1 mmol, yields reported are the isolated yield.

**Table S9.** Control experiment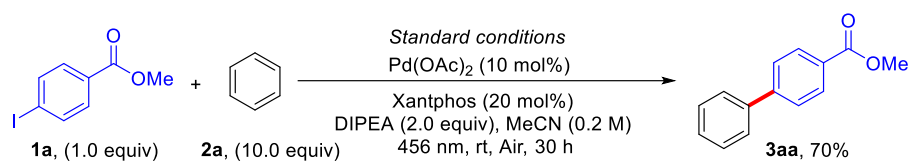

| Entry | Deviation from standard conditions | % Yield <sup>[a]</sup> |
|-------|------------------------------------|------------------------|
| 1     | No catalyst                        | 0                      |
| 2     | No ligand                          | 0                      |
| 3     | No light                           | 0                      |
| 4     | No base                            | Trace                  |
| 5     | Under argon atmosphere             | 65                     |
| 6     | Benzene as a solvent               | 55                     |

[a] Reaction scale 0.1 mmol, yields reported are the isolated yield.

## 5. Mechanistic studies

### 5.1 Determination of Quantum yield

#### (A) Determination of light intensity of Blue LED

The determination of photon flux was performed by the use of standard ferrioxalate actinometry.<sup>[1,2]</sup> A 0.15 M solution of ferrioxalate was prepared by the addition of 737 mg of potassium ferrioxalate hydrate in 10 ml of 0.05 M H<sub>2</sub>SO<sub>4</sub>. Thereafter, a solution of phenanthroline was made by adding 25 mg of phenanthroline and 5.63 g of sodium acetate in 25 mL of 0.5 M H<sub>2</sub>SO<sub>4</sub>. Both solutions were kept in a dark environment. Next, for the determination of photon flux, 1.0 mL of the ferrioxalate solution Both a cuvette and irradiated for 60.0 seconds at  $\lambda = 456$  nm placing 8 cm away from 36 W Kessil blue LED lamp. After irradiation, 0.175 mL of the phenanthroline solution was added to the cuvette. The solution was left for 1 h to permit the ferrous ions to completely coordinate to the phenanthroline. The solution gave an absorbance at 510 nm which was recorded. The same was prepared but this time without irradiation and its absorbance was determined at 510 nm. Conversion was calculated using eq. 1

$$\text{mol of Fe}^{2+} = \frac{v \cdot \Delta A}{\epsilon \cdot l} \quad \dots\dots\dots 1$$

Where  $v$  stands for total volume (0.001175 L) of the solution after addition of the phenanthroline.  $\Delta A$  is the difference in absorbance at 510 nm between the irradiated and non-irradiated solutions,  $l$  is the path length (1.000 cm), and  $\epsilon$  is the molar absorptivity at 510 nm (11,100 L mol<sup>-1</sup> cm<sup>-1</sup>).

$$\begin{aligned} \text{mol of Fe}^{2+} &= \frac{0.001175 \text{ L} \cdot (0.968 - 0.850)}{11100 \text{ L} \cdot \text{cm}^{-1} \cdot \text{mol}^{-1} \cdot 1 \text{ cm}} \\ &= 1.2490 \times 10^{-8} \end{aligned}$$

The photon flux can be calculated using eq 2.

$$\text{Photon Flux} = \frac{\text{mol Fe}^{2+}}{\Phi \cdot t \cdot f} \quad \dots\dots\dots 2$$

Where  $\Phi$  is the quantum yield for the ferrioxalate actinometer (1.01 for a 0.15 M solution at  $\lambda = 456$  nm),  $t$  is the time (60 s), and  $f$  is the fraction of light absorbed at  $\lambda = 456$  nm,  $f = 1.000 - 10^{-A}$ .

$$\text{Calculated } f = 1.000 - 10^{-A} = 1.000 - 10^{-0.968} = 0.8923$$

$$\begin{aligned}\text{Photon Flux} &= \frac{1.2490 \times 10^{-8}}{1.01 \times 60 \times 0.8923} \\ &= 2.31 \times 10^{-8} \text{ Einstein.S}^{-1}\end{aligned}$$

### (B) Quantum yield calculation 1:

An oven-dried glass vial was charged with a magnetic stir bar, methyl 4-iodobenzoate (**1a**) (26 mg, 0.1 mmol, 1.0 equiv), Benzene (**2a**) (89.06  $\mu$ l, 1.0 mmol, 10.0 equiv), Pd(OAc)<sub>2</sub> (2.2 mg, 0.01 mmol, 0.1 equiv), Xantphos (11.6 mg, 0.02 mmol, 0.2 equiv), DIPEA (34.8  $\mu$ l, 0.2 mmol, 2 equiv) and MeCN (0.2 M). were added to the mixture under open atmosphere. The vial was maintained for 30 h at room temperature under 456 nm blue LED with constant stirring. The reaction mixtures were then filtered through a short pad of celite to remove insolubles and washed with EtOAc. The product of high analytical purity was achieved through column chromatography on silica gel, employing a (2–5%) solution of petroleum ether and ethyl acetate as the elution solvents. The product (**3aa**) was confirmed by NMR. The product recorded a yield of 70% ( $9.944 \times 10^{-5}$  mol).

The Quantum yield was calculated as follows:

$$\phi = \frac{\text{mol product}}{\text{flux. } t. f}$$

Where, flux is the photon flux determined by ferrioxalate actinometry ( $2.31 \times 10^{-8}$  Einstein.S<sup>-1</sup>), t is the time (86400 s), and f (> 0.999) is the fraction of light absorbed by Pd(OAc)<sub>2</sub> at 456 nm under the reaction condition mentioned above.

$$\begin{aligned}\Phi &= \frac{6.944 \times 10^{-5}}{2.31 \times 10^{-8} \times 86400 \times 1} \\ &= 0.034\end{aligned}$$

### (C) Quantum yield calculation 2:

An oven-dried glass vial was charged with a magnetic stir bar, 1-(tert-butyl)-4-iodobenzene (**1g**) (26.0 mg, 0.1 mmol, 1.0 equiv), Benzene (**2a**) (89.06  $\mu$ l, 1.0 mmol, 10.0 equiv), Pd(OAc)<sub>2</sub> (2.2 mg, 0.01 mmol, 0.1 equiv), Xantphos (11.6 mg, 0.02 mmol, 0.2 equiv.), DIPEA (34.8  $\mu$ l, 0.2 mmol, 2 equiv.) and MeCN (0.2 M). were added to the mixture under open atmosphere. The vial was maintained for 30 h at room temperature under 456 nm blue

LED with constant stirring. The reaction mixtures were then filtered through a short pad of celite to remove insolubles and washed with EtOAc. The product of high analytical purity was achieved through column chromatography on silica gel, employing a (2–5%) solution of petroleum ether and ethyl acetate as the elution solvents. The product (**3ga**) was confirmed by NMR. The product recorded a yield of 43% ( $4.3 \times 10^{-5}$  mol).

The Quantum yield was calculated as follows:

$$\phi = \frac{\text{mol product}}{\text{flux. t. f}}$$

Where, flux is the photon flux determined by ferrioxalate actinometry ( $2.31 \times 10^{-8}$  Einstein.S<sup>-1</sup>), t is the time (86400 s), and f (> 0.999) is the fraction of light absorbed by Pd(OAc)<sub>2</sub> at 456 nm under the reaction condition mentioned above.

$$\begin{aligned}\phi &= \frac{4.3 \times 10^{-5}}{2.31 \times 10^{-8} \times 86400 \times 1} \\ &= 0.021\end{aligned}$$

#### (D) Quantum yield calculation 3:

An oven-dried glass vial was charged with a magnetic stir bar, benzyl 4-iodobenzoate (**1b**) (26.0 mg, 0.1 mmol, 1.0 equiv), Benzene (**2a**) (89.06  $\mu$ l, 1.0 mmol, 10.0 equiv), Pd(OAc)<sub>2</sub> (2.2 mg, 0.01 mmol, 0.1 equiv), Xantphos (11.6 mg, 0.02 mmol, 0.2 equiv), DIPEA (34.8  $\mu$ l, 0.2 mmol, 2.0 equiv) and MeCN (0.2 M). were added to the mixture under open atmosphere. The vial was maintained for 30 h at room temperature under 456 nm blue LED with constant stirring. The reaction mixtures were then filtered through a short pad of celite to remove insolubles and washed with EtOAc. The product of high analytical purity was achieved through column chromatography on silica gel, employing a (2–5%) solution of petroleum ether and ethyl acetate as the elution solvents. The product (**3ba**) was confirmed by NMR. The product recorded a yield of 89% ( $8.895 \times 10^{-5}$  mol).

The Quantum yield was calculated as follows:

$$\phi = \frac{\text{mol product}}{\text{flux. t. f}}$$

Where, flux is the photon flux determined by ferrioxalate actinometry ( $2.31 \times 10^{-8}$  Einstein.S<sup>-1</sup>), t is the time (86400 s), and f (> 0.999) is the fraction of light absorbed by Pd(OAc)<sub>2</sub> at 456 nm under the reaction condition mentioned above.

$$\Phi = \frac{8.895 \times 10^{-5}}{2.31 \times 10^{-8} \times 86400 \times 1}$$
$$= 0.0445$$

## 5.2 Luminescence Quenching experiments:

### (A) Preparation of the stock solution:

To verify the role of the Pd(0) catalyst as the photoabsorbing species, emission quenching studies were undertaken. Although the Pd(Xantphos)<sub>2</sub> complex was synthesized following the reported method,<sup>[3]</sup> it exhibited poor solubility in commonly used organic solvents such as CH<sub>3</sub>CN and benzene. As a result, Pd(PPh<sub>3</sub>)<sub>4</sub> was employed for the quenching experiments, as it was demonstrated to be an effective catalyst for the visible-light-mediated C(sp)<sup>2</sup>-H Arylation. (see optimization Table S4). So, Emission quenching studies were performed using a 0.86 mM of Pd(PPh<sub>3</sub>)<sub>4</sub> in CH<sub>3</sub>CN, with methyl 4-iodobenzoate (**1a**) in CH<sub>3</sub>CN at varying concentrations (4, 8, 12, 16, and 20 mM). The samples were excited at 380 nm, and the emission intensity at 615 nm was recorded.<sup>[4-6]</sup> The extent of quenching was quantified by the ratio I<sub>0</sub>/I, where I<sub>0</sub> denotes the emission intensity of the Pd catalyst at 615 nm in the absence of any quencher, and I represents the measured intensity at a given quencher concentration. The fluorescence emission spectra along with the corresponding Stern–Volmer plot are shown in the figures below.

**(C) Luminescence spectra:**

**Luminescence spectra of Pd(PPh<sub>3</sub>)<sub>4</sub> (0.86 mM in CH<sub>3</sub>CN) as a function of concentration of methyl 4-iodobenzoate (1a).**

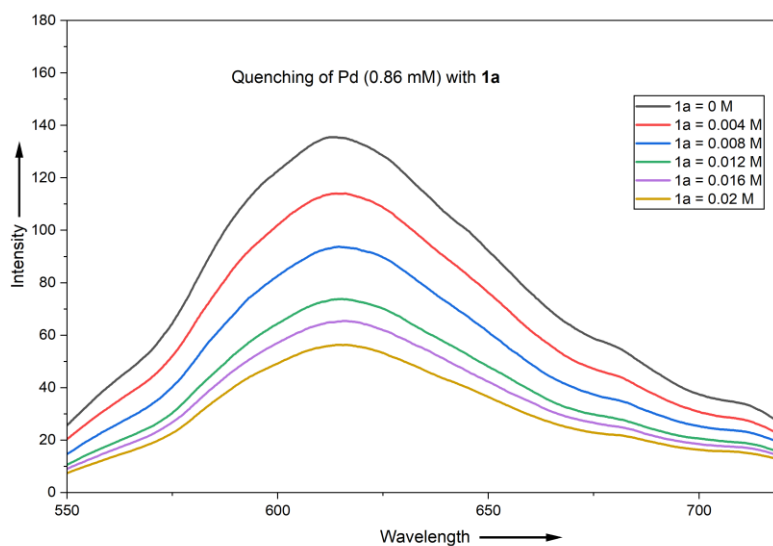

**Stern-Volmer plot for the emission quenching of Pd(PPh<sub>3</sub>)<sub>4</sub> by various concentrations of methyl 4-iodobenzoate (1a) in CH<sub>3</sub>CN.**

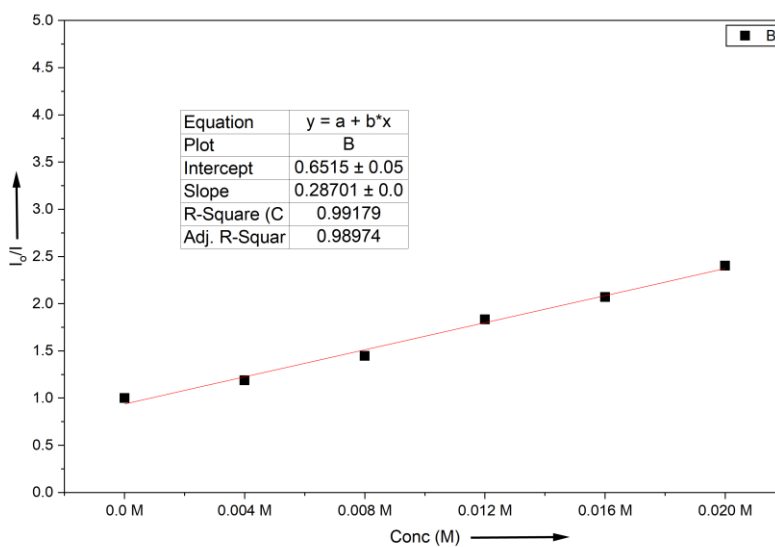



### 5.3 Cyclic Voltammetry experiments:

Cyclic voltammograms were recorded for methyl 4-iodobenzoate (**1a**). This electrochemical cell contains a glassy carbon (disc shaped with 3-mm diameter) as working electrode, Pt wire as counter electrode, and Ag wire as pseudo-reference electrode. The glassy carbon working electrode was polished with 1.0 micron  $\alpha$ -alumina polishing powder using a figure eight motion. Electrolyte solution (0.1 M) was prepared from CH<sub>3</sub>CN and tetra-nbutylammonium hexafluorophosphate (Bu<sub>4</sub>NPF<sub>6</sub>). The CH<sub>3</sub>CN was degassed by nitrogen gas sparging for 10 minutes prior to measurements. The potential was externally calibrated against the ferrocene/ferrocenium couple (0.47 V) for **1a**. When the cyclic voltammetry (CV) value of the methyl 4-iodobenzoate (**1a**) is referenced to the saturated calomel electrode, it is approximately  $E_p = -2.0$  V vs SCE. in CH<sub>3</sub>CN (using Pavlishchuk and Addison conversion constant for SCE).<sup>[7]</sup>

#### (a) Cyclic Voltammogram of methyl 4-iodobenzoate (**1a**)

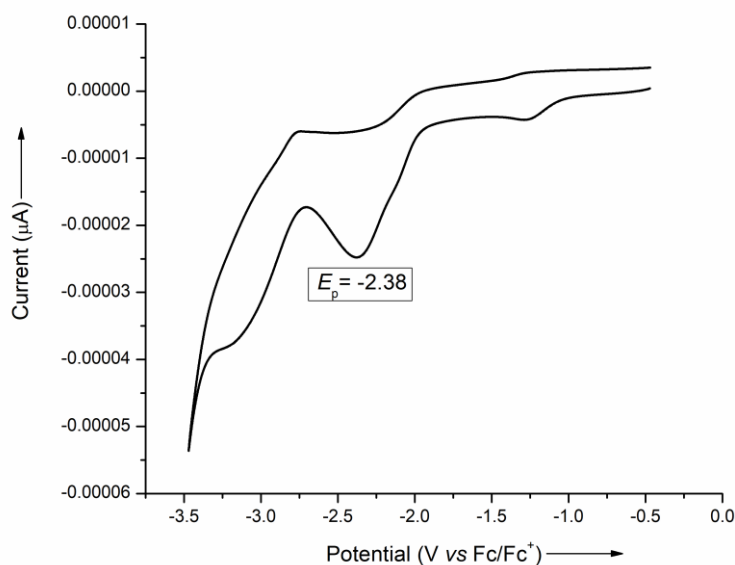

### 5.4 Independent kinetic isotope exchange (KIE) study

Following GP-2, Six set of reactions were performed independently with non-deuterated and deuterated analogue of **2a** and quenched at 5 h, 10 h, 15 h, 20 h and 25 h, 30 h. The isolated yields were calculated at a particular time and repeated three times to minimize the error. Then the graph of % yield vs. Reaction time was plotted for both analogues and from the slopes of the graphs, the  $k_H/k_D$  was calculated.

**Procedure:** According to **GP-2**, using **1a** (52 mg, 0.2 mmol, 1.0 equiv), **2a** (178  $\mu$ l, 2.0 mmol, 10.0 equiv) and Pd(OAc)<sub>2</sub> (4.4 mg, 0.02 mmol, 0.1 equiv), Xantphos (23.2 mg, 0.04 mmol, 0.2 equiv), DIPEA (69.6  $\mu$ l, 0.4 mmol, 2.0 equiv), The mixture was dissolved in MeCN (0.2 M) under open atmosphere followed by the vial was sealed with a Teflon cap and rapped with parafilm. six sets of reactions were performed separately. After the mentioned time, the reaction mixtures were purified separately by column chromatography on silica gel using 2.5% ethyl acetate in hexane as eluent.

The same procedure was followed for the deuterated analogue using **1a** (52 mg, 0.2 mmol, 1.0 equiv), **2a<sub>D</sub>** (178  $\mu$ l, 2.0 mmol, 10.0 equiv) and Pd(OAc)<sub>2</sub> (4.4 mg, 0.02 mmol, 0.1 equiv), Xantphos (23.2 mg, 0.04 mmol, 0.2 equiv), DIPEA (69.6  $\mu$ l, 0.4 mmol, 2.0 equiv), The mixture was dissolved in MeCN (0.2 M) under open atmosphere followed by the vial was sealed with a Teflon cap and rapped with parafilm. Six sets of reactions were performed separately. After the mentioned time, the reaction mixtures were purified separately by column chromatography on silica gel using 2.5% ethyl acetate in hexane as eluent.

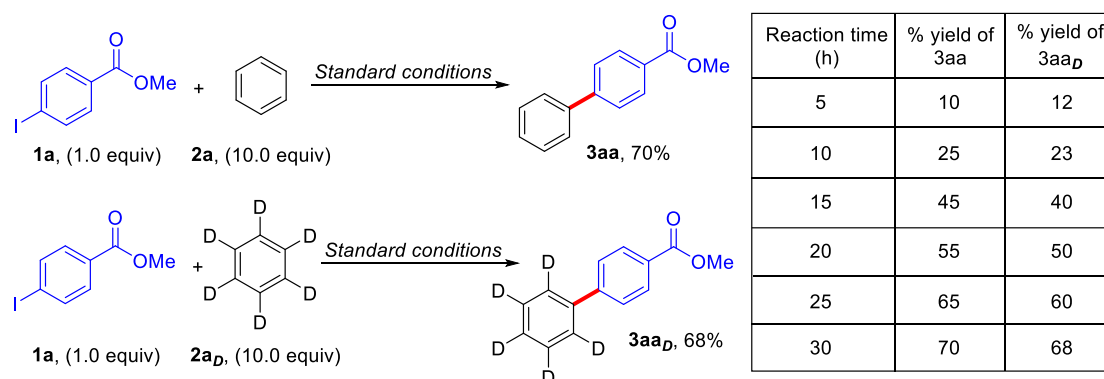

**methyl [1,1'-biphenyl]-4-carboxylate-2',3',4',5',6'-d<sub>5</sub> (3aa<sub>D</sub>) (536)**

**<sup>1</sup>H NMR** (400 MHz, CDCl<sub>3</sub>)  $\delta$  8.11 (d, *J* = 8.6 Hz, 2H), 7.67 (d, *J* = 8.6 Hz, 2H), 3.94 (s, 3H).

**<sup>13</sup>C NMR** (101 MHz, CDCl<sub>3</sub>)  $\delta$  167.2, 145.7, 139.9, 130.2, 128.9, 127.1, 52.3.

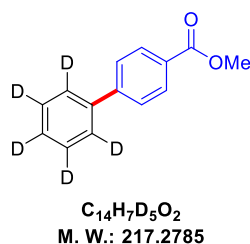

**Yield vs. time plot for determining  $k_H/k_D$ .**

Linear fitting of the experimental points has been done by keeping intercept = 0. Ratio of the slopes of the straight lines for **3aa** and **3aa<sub>D</sub>** indicates the value of  $k_H/k_D$  which is nearly 1 in this case.

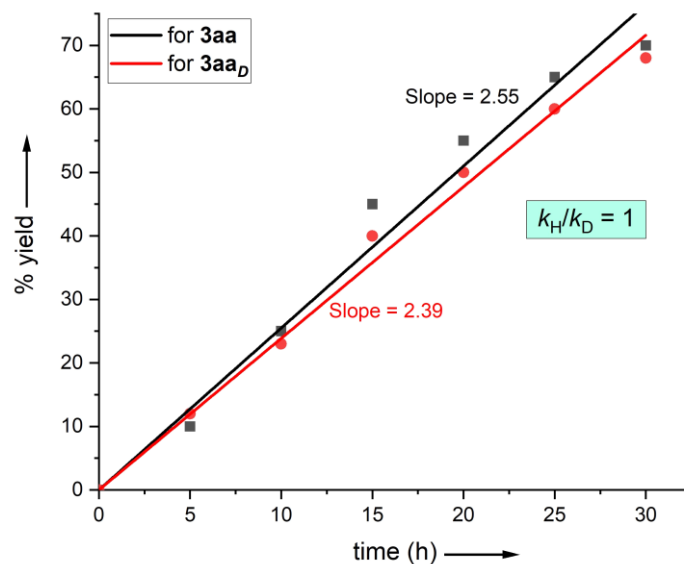

8.12  
8.10  
7.68  
7.66

3.94

**<sup>1</sup>H, CDCl<sub>3</sub>, 400 MHz**

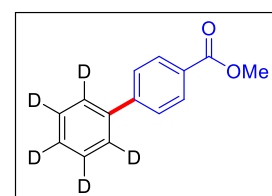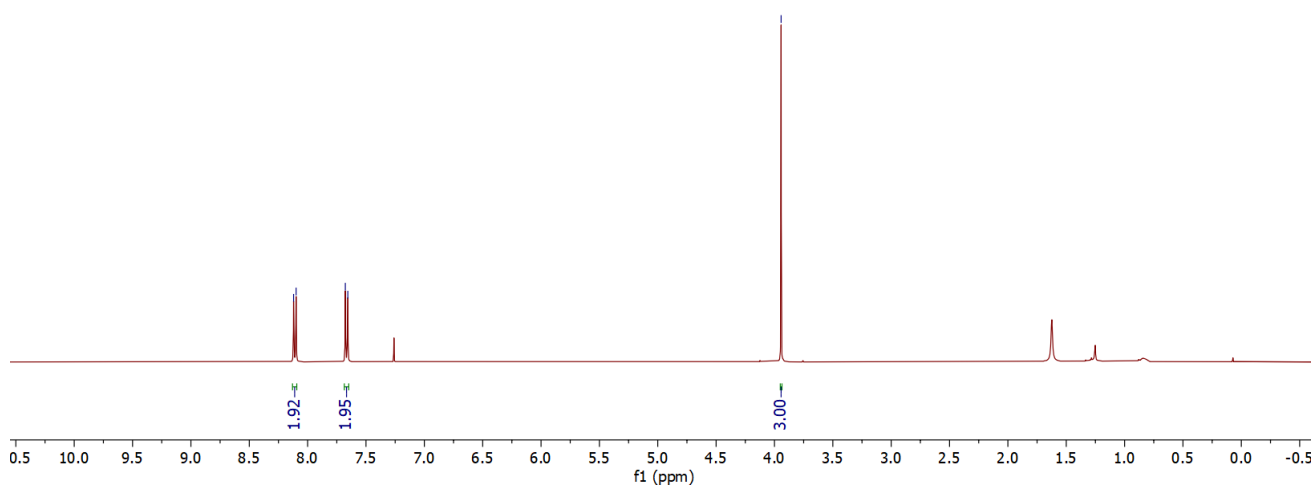

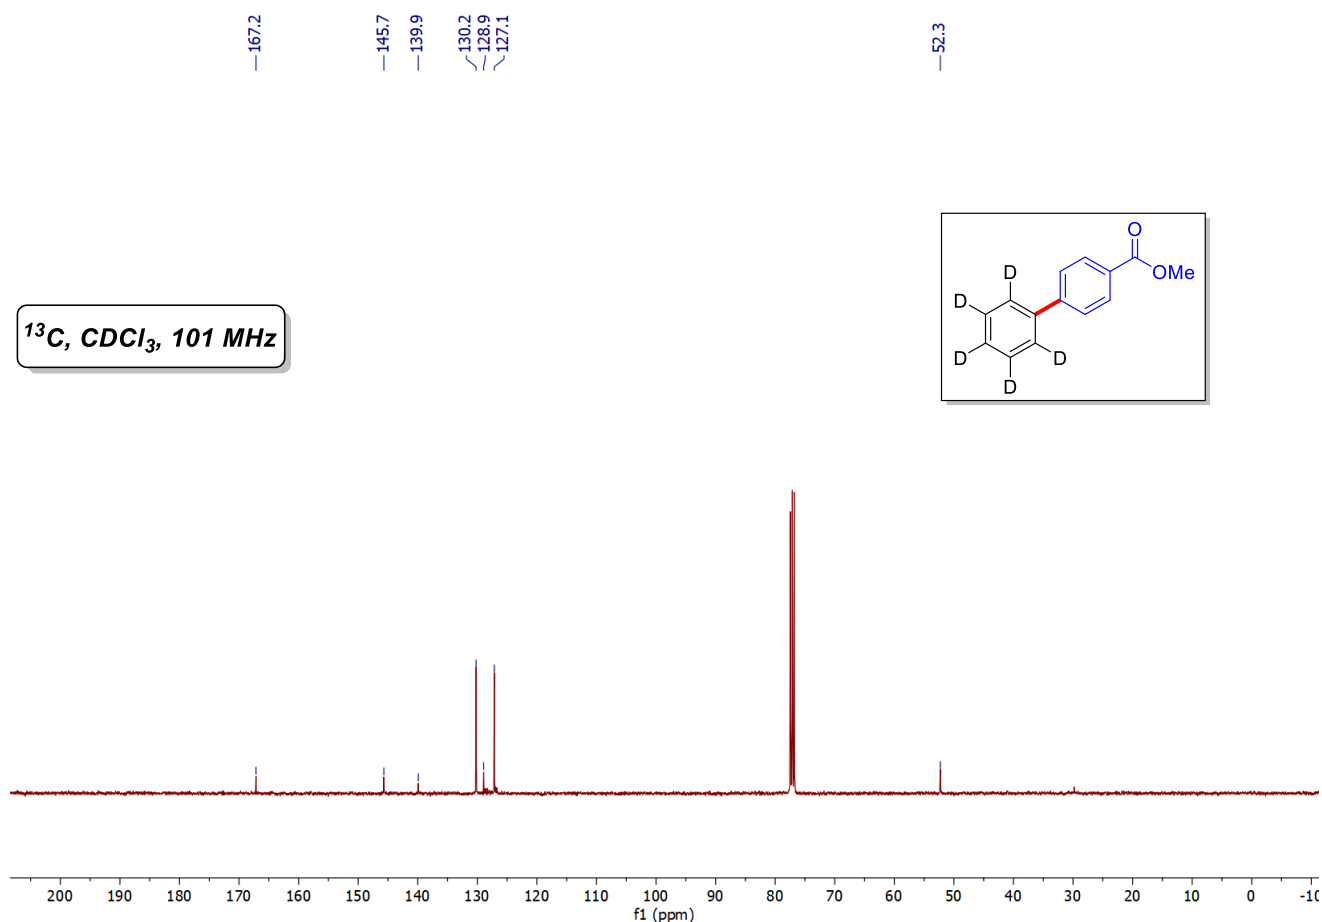

### 5.5 Radical trap experiment:

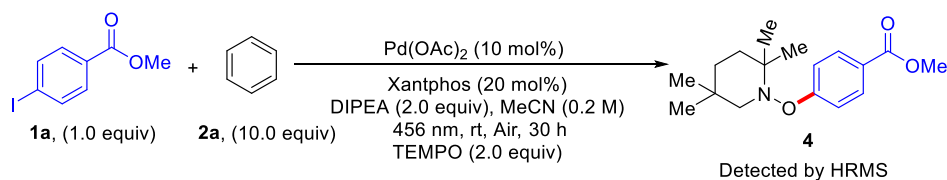

Following standard procedure, methyl 4-iodobenzoate (**1a**) (52 mg, 0.2 mmol, 1.0 equiv), Benzene (**2a**) (178  $\mu\text{l}$ , 2.0 mmol, 10.0 equiv),  $\text{Pd}(\text{OAc})_2$  (4.4 mg, 0.02 mmol, 0.1 equiv), Xantphos (23.2 mg, 0.04 mmol, 0.2 equiv), DIPEA (69.6  $\mu\text{l}$ , 0.4 mmol, 2.0 equiv), TEMPO (63.5 mg, 0.4 mmol, 2.0 equiv). The mixture was dissolved in MeCN (0.2 M) under open atmosphere followed by the vial was sealed with a teflon cap and rapped with parafilm. The reaction mixture was then stirred under the irradiation of 456 nm light for about 30 h at room temperature. The reaction mixtures were then filtered through a short pad of celite to remove insolubles and washed with EtOAc. The product was confirmed by HRMS.

### 5.5.1 Experimental details for the TEMPO adduct:

#### methyl 4-((2,2,5,5-tetramethylpiperidin-1-yl)oxy)benzoate

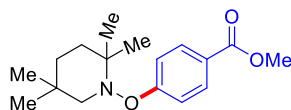

**HRMS (ESI):**  $m/z$   $[M+H]^+$  Calculated for  $[C_{17}H_{26}NO_3]^+$  : 292.1913; Found 292.1909.

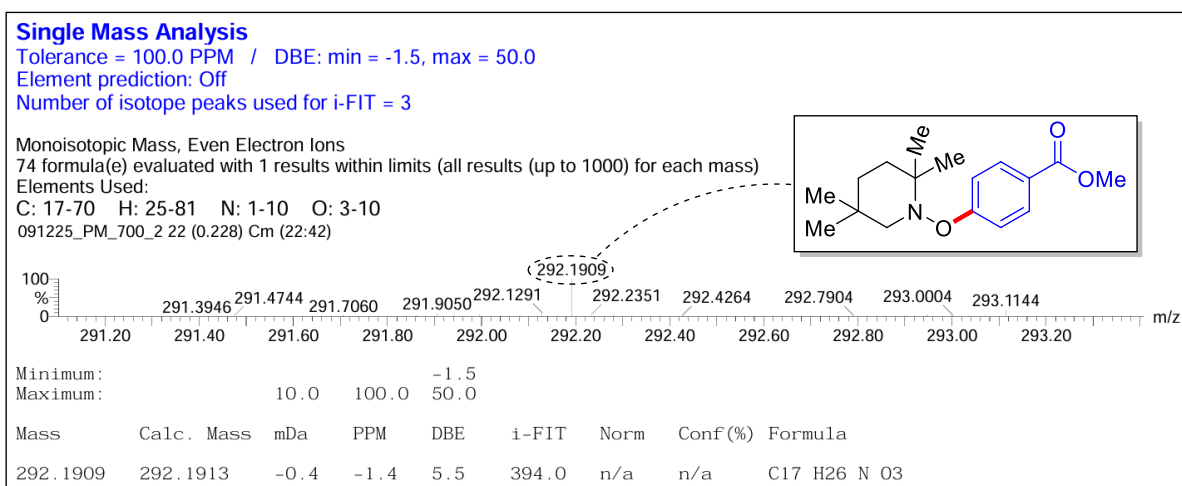

### 6. 1 mmol scale synthesis

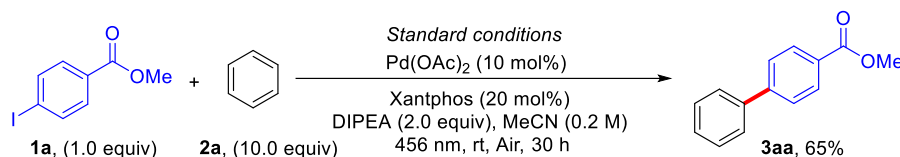

An 15 ml oven-dried glass vial was charged with a magnetic stir bar, methyl 4-iodobenzoate (**1a**) (260 mg, 0.2 mmol, 1.0 equiv), Benzene (**2a**) (890  $\mu$ l, 2.0 mmol, 10.0 equiv),  $Pd(OAc)_2$  (22 mg, 0.02 mmol, 0.1 equiv), Xantphos (116 mg, 0.04 mmol, 0.2 equiv), DIPEA (348  $\mu$ l, 0.4 mmol, 2.0 equiv). The mixture was dissolved in MeCN (0.2 M) under open atmosphere followed by the vial was sealed with a Teflon cap and rapped with parafilm. The reaction mixture was then stirred under the irradiation of 456 nm light for about 30 h at room temperature. The reaction mixtures were then filtered through a short pad of celite to remove insolubles and washed with EtOAc. The product of high analytical purity was achieved through column chromatography on silica gel, employing a (2–5%) solution of petroleum ether and ethyl acetate as the elution solvents. The product (**3aa**) was obtained as colorless

solid, recording a yield of 65% (140 mg). The product was confirmed by NMR and Mass spectroscopy.

## 7. General procedure for the visible-light-mediated C(sp)<sup>2</sup>-H Arylation (GP-2)

An oven-dried glass vial was charged with a magnetic stir bar, Aryl iodide (**1**) (0.2 mmol, 1.0 equiv), Arenes (**2**) (**a.** 2.0 mmol, 10.0 equiv for volatile and less than 100°C boiling point. **b.** 0.6 mmol, 3.0 equiv for non-volatile and more than 100°C boiling point), Pd(OAc)<sub>2</sub> (4.4 mg, 0.02 mmol, 0.1 equiv), Xantphos (23.2 mg, 0.04 mmol, 0.2 equiv), DIPEA (69.6 µl, 0.4 mmol, 2.0 equiv). The mixture was dissolved in MeCN (0.2 M) under open atmosphere followed by the vial was sealed with a Teflon cap and rapped with parafilm. The reaction mixture was then stirred under the irradiation of 456 nm light for about 30 h at room temperature. The reaction mixtures were then filtered through a short pad of celite to remove insolubles and washed with EtOAc. The product of high analytical purity was achieved through column chromatography on silica gel, employing a (2–5%) solution of petroleum ether and ethyl acetate as the elution solvents. The product was confirmed by NMR and Mass spectroscopy.

## 8. Experimental details for the synthesized compounds obtained from GP-2

### methyl [1,1'-biphenyl]-4-carboxylate (**3aa**)

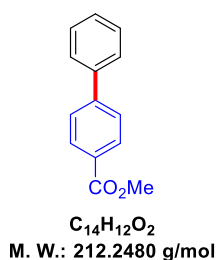

Prepared according to the **GP-2**, using methyl 4-iodobenzoate (**1a**) (52 mg, 0.2 mmol, 1.0 equiv), Benzene (**2a**) (178 µl, 2.0 mmol, 10.0 equiv), Pd(OAc)<sub>2</sub> (4.4 mg, 0.02 mmol, 0.1 equiv), Xantphos (23.2 mg, 0.04 mmol, 0.2 equiv), DIPEA (69.6 µl, 0.4 mmol, 2.0 equiv) and MeCN (0.2 M). A (2–5%) solution of petroleum ether and ethyl acetate was used as eluent for the purification of the desired product through column chromatography on silica gel. The product (**3aa**) was obtained as colorless solid, recording a yield of 70% (30 mg).

**HRMS (ESI):** m/z [M+H]<sup>+</sup> Calculated for [C<sub>14</sub>H<sub>13</sub>O<sub>2</sub>]<sup>+</sup> : 213.0916; Found 213.0933.

**<sup>1</sup>H NMR** (400 MHz, CDCl<sub>3</sub>) δ 8.12–8.10 (m, 2H), 7.68–7.65 (m, 2H), 7.64–7.61 (m, 2H), 7.49–7.45 (m, 2H), 7.42–7.38 (m, 1H), 3.94 (s, 3H).

**<sup>13</sup>C NMR** (101 MHz, CDCl<sub>3</sub>) δ 167.2, 145.8, 140.1, 130.2, 129.1, 129.0, 128.3, 127.4, 127.2, 52.3.

**benzyl [1,1'-biphenyl]-4-carboxylate (3ba)**

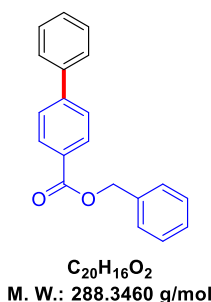

Prepared according to the **GP-2**, using methyl benzyl 4-iodobenzoate (**1b**) (67.6 mg, 0.2 mmol, 1.0 equiv), Benzene (**2a**) (178 μl, 2.0 mmol, 10.0 equiv), Pd(OAc)<sub>2</sub> (4.4 mg, 0.02 mmol, 0.1 equiv), Xantphos (23.2 mg, 0.04 mmol, 0.2 equiv), DIPEA (69.6 μl, 0.4 mmol, 2.0 equiv) and MeCN (0.2 M). A (2–5%) solution of petroleum ether and ethyl acetate was used as eluent for the purification of the desired product through column chromatography on silica gel. The product (**3ba**) was obtained as colorless solid, recording a yield of 90% (52 mg). Analytical data matched those reported in the literature.<sup>[8]</sup>

**<sup>1</sup>H NMR** (400 MHz, CDCl<sub>3</sub>) δ 8.15 (d, *J* = 8.6 Hz, 2H), 7.68–7.65 (m, 2H), 7.63 (dd, *J* = 7.3, 1.9 Hz, 2H), 7.49–7.46 (m, 4H), 7.43–7.34 (m, 4H), 5.40 (s, 2H).

**<sup>13</sup>C NMR** (101 MHz, CDCl<sub>3</sub>) δ 166.5, 145.9, 140.1, 136.2, 130.4, 129.1, 128.9, 128.8, 128.4, 128.3, 128.3, 127.4, 127.2, 66.8.

**[1,1'-biphenyl]-4-carbonitrile (3ca)**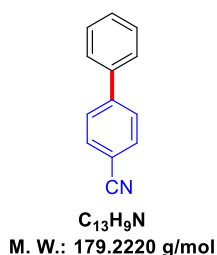

Prepared according to the **GP-2**, using 4-iodobenzonitrile (**1c**) (45.6 mg, 0.2 mmol, 1.0 equiv), Benzene (**2a**) (178  $\mu\text{l}$ , 2.0 mmol, 10.0 equiv),  $\text{Pd}(\text{OAc})_2$  (4.4 mg, 0.02 mmol, 0.1 equiv), Xantphos (23.2 mg, 0.04 mmol, 0.2 equiv), DIPEA (69.6  $\mu\text{l}$ , 0.4 mmol, 2.0 equiv) and MeCN (0.2 M). A (2–5%) solution of petroleum ether and ethyl acetate was used as eluent for the purification of the desired product through column chromatography on silica gel. The product (**3ca**) was obtained as colorless solid, recording a yield of 60% (22 mg).

**HRMS (ESI):**  $m/z$   $[\text{M}+\text{H}]^+$  Calculated for  $[\text{C}_{13}\text{H}_{10}\text{N}]^+$ : 180.0833; Found 180.0843.

**$^1\text{H}$  NMR** (400 MHz,  $\text{CDCl}_3$ )  $\delta$  7.74 – 7.72 (m, 2H), 7.69 (d,  $J$  = 8.6 Hz, 2H), 7.61 – 7.58 (m, 2H), 7.51 – 7.47 (m, 2H), 7.45 – 7.41 (m, 1H).

**$^{13}\text{C}$  NMR** (101 MHz,  $\text{CDCl}_3$ )  $\delta$  132.9, 132.3, 131.7, 130.2, 129.2, 127.0, 122.6, 119.0, 112.6.

**4-(trifluoromethyl)-1,1'-biphenyl (3da)**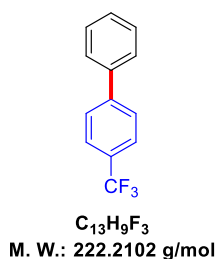

Prepared according to the **GP-2**, using methyl 1-iodo-4-(trifluoromethyl)benzene (**1d**) (54.4 mg, 0.2 mmol, 1.0 equiv), Benzene (**2a**) (178  $\mu\text{l}$ , 2.0 mmol, 10.0 equiv),  $\text{Pd}(\text{OAc})_2$  (4.4 mg, 0.02 mmol, 0.1 equiv), Xantphos (23.2 mg, 0.04 mmol, 0.2 equiv), DIPEA (69.6  $\mu\text{l}$ , 0.4 mmol, 2.0 equiv) and MeCN (0.2 M). A (2–5%) solution of petroleum ether and ethyl acetate was used as eluent for the purification of the desired product through column chromatography on silica gel. The product (**3da**) was obtained as colorless solid, recording a yield of 70% (31 mg). Analytical data matched those reported in the literature.<sup>[9]</sup>



**$^1\text{H}$  NMR** (400 MHz,  $\text{CDCl}_3$ )  $\delta$  7.70 (s, 4H), 7.62–7.59 (m, 2H), 7.50–7.46 (m, 2H), 7.43–7.39 (m, 1H).

**$^{13}\text{C}$  NMR** (101 MHz,  $\text{CDCl}_3$ )  $\delta$  143.4, 130.4 (q,  $J = 32.6$  Hz), 129.1, 128.3, 127.8, 127.6, 127.4, 126.1 (q,  $J = 3.8$  Hz), 124.3 (q,  $J = 272.0$  Hz).

**$^{19}\text{F}$  NMR** (376 MHz,  $\text{CDCl}_3$ )  $\delta$  -62.55 (3F).

#### 4-fluoro-1,1'-biphenyl (**3ea**)

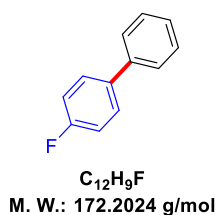

Prepared according to the **GP-2**, using methyl 1-fluoro-4-iodobenzene (**1e**) (44.4 mg, 0.2 mmol, 1.0 equiv), Benzene (**2a**) (178  $\mu\text{l}$ , 2.0 mmol, 10.0 equiv),  $\text{Pd}(\text{OAc})_2$  (4.4 mg, 0.02 mmol, 0.1 equiv), Xantphos (23.2 mg, 0.04 mmol, 0.2 equiv), DIPEA (69.6  $\mu\text{l}$ , 0.4 mmol, 2.0 equiv) and MeCN (0.2 M). A (2–5%) solution of petroleum ether and ethyl acetate was used as eluent for the purification of the desired product through column chromatography on silica gel. The product (**3ea**) was obtained as colorless solid, recording a yield of 50% (17 mg). Analytical data matched those reported in the literature.<sup>[10]</sup>

**$^1\text{H}$  NMR** (400 MHz,  $\text{CDCl}_3$ )  $\delta$  7.66–7.61 (m, 2H), 7.52–7.49 (m, 2H), 7.32–7.28 (m, 1H), 7.26–7.22 (m, 2H), 6.87–6.81 (m, 2H).

**$^{13}\text{C}$  NMR** (101 MHz,  $\text{CDCl}_3$ )  $\delta$  162.6 (d,  $J = 246.2$  Hz), 140.4, 137.4, 129.0, 128.8 (d,  $J = 7.9$  Hz), 127.4, 127.2, 115.8 (d,  $J = 21.2$  Hz).

**$^{19}\text{F}$  NMR** (376 MHz,  $\text{CDCl}_3$ )  $\delta$  -115.77 (1F).

**4-isopropyl-1,1'-biphenyl (3fa)**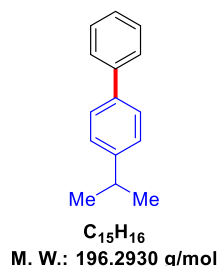

Prepared according to the **GP-2**, using methyl 1-iodo-4-isopropylbenzene (**1f**) (49.2 mg, 0.2 mmol, 1.0 equiv), Benzene (**2a**) (178  $\mu$ l, 2.0 mmol, 10.0 equiv), Pd(OAc)<sub>2</sub> (4.4 mg, 0.02 mmol, 0.1 equiv), Xantphos (23.2 mg, 0.04 mmol, 0.2 equiv), DIPEA (69.6  $\mu$ l, 0.4 mmol, 2.0 equiv) and MeCN (0.2 M). A (2–5%) solution of petroleum ether and ethyl acetate was used as eluent for the purification of the desired product through column chromatography on silica gel. The product (**3fa**) was obtained as colorless solid, recording a yield of 65% (25 mg). Analytical data matched those reported in the literature.<sup>[11]</sup>

**<sup>1</sup>H NMR** (400 MHz, CDCl<sub>3</sub>)  $\delta$  7.59 (d,  $J$  = 7.6 Hz, 2H), 7.54 (d,  $J$  = 8.2 Hz, 2H), 7.45–7.42 (m, 2H), 7.35–7.30 (m, 3H), 3.02–2.91 (m, 1H), 1.30 (d,  $J$  = 6.9 Hz, 6H).

**<sup>13</sup>C NMR** (101 MHz, CDCl<sub>3</sub>)  $\delta$  148.1, 141.3, 138.9, 128.8, 128.0, 127.2, 127.0, 123.7, 33.9, 24.2.

**4-(tert-butyl)-1,1'-biphenyl (3ga)**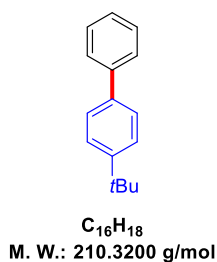

Prepared according to the **GP-2**, using methyl 1-(tert-butyl)-4-iodobenzene (**1g**) (52 mg, 0.2 mmol, 1.0 equiv), Benzene (**2a**) (178  $\mu$ l, 2.0 mmol, 10.0 equiv), Pd(OAc)<sub>2</sub> (4.4 mg, 0.02 mmol, 0.1 equiv), Xantphos (23.2 mg, 0.04 mmol, 0.2 equiv), DIPEA (69.6  $\mu$ l, 0.4 mmol, 2.0 equiv) and MeCN (0.2 M). A (2–5%) solution of petroleum ether and ethyl acetate was used as eluent for the purification of the desired product through column chromatography on silica gel. The product (**3ga**) was obtained as colorless solid, recording a yield of 43% (18 mg).

**HRMS (ESI):**  $m/z$  [M+H]<sup>+</sup> Calculated for [C<sub>16</sub>H<sub>19</sub>]<sup>+</sup> : 211.1487; Found 211.1466.

**<sup>1</sup>H NMR** (400 MHz, CDCl<sub>3</sub>) δ 7.61–7.59 (m, 2H), 7.56–7.53 (m, 2H), 7.49–7.42 (m, 4H), 7.36–7.31 (m, 1H), 1.37 (s, 9H).

**<sup>13</sup>C NMR** (101 MHz, CDCl<sub>3</sub>) δ 150.4, 141.2, 138.4, 128.8, 127.2, 127.1, 126.9, 125.9, 34.7, 31.5.

### 1,1':4',1''-terphenyl (**3ha**)

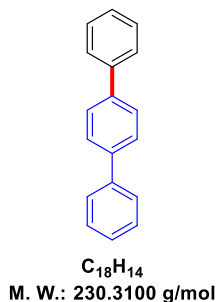

Prepared according to the **GP-2**, using methyl 4-iodo-1,1'-biphenyl (**1h**) (56 mg, 0.2 mmol, 1.0 equiv), Benzene (**2a**) (178 μl, 2.0 mmol, 10.0 equiv), Pd(OAc)<sub>2</sub> (4.4 mg, 0.02 mmol, 0.1 equiv), Xantphos (23.2 mg, 0.04 mmol, 0.2 equiv), DIPEA (69.6 μl, 0.4 mmol, 2.0 equiv) and MeCN (0.2 M). A (2–5%) solution of petroleum ether and ethyl acetate was used as eluent for the purification of the desired product through column chromatography on silica gel. The product (**3ha**) was obtained as colorless solid, recording a yield of 70% (32 mg).

**HRMS (ESI):** m/z [M+Na]<sup>+</sup> Calculated for [C<sub>18</sub>H<sub>14</sub>Na]<sup>+</sup>: 253.0993; Found 253.0995.

**<sup>1</sup>H NMR** (400 MHz, CDCl<sub>3</sub>) δ 7.69 (s, 4H), 7.67–7.64 (m, 4H), 7.48 (t, *J* = 7.6 Hz, 4H), 7.40–7.36 (m, 2H).

**<sup>13</sup>C NMR** (101 MHz, CDCl<sub>3</sub>) δ 140.8, 140.2, 129.0, 127.6, 127.5, 127.2.

### 3-methoxy-1,1'-biphenyl (**3ia**)

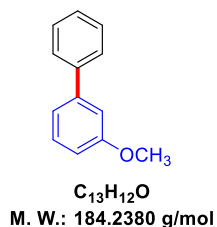

Prepared according to the **GP-2**, using methyl 1-iodo-3-methoxybenzene (**1i**) (46.8 mg, 0.2 mmol, 1.0 equiv), Benzene (**2a**) (178 μl, 2.0 mmol, 10.0 equiv), Pd(OAc)<sub>2</sub> (4.4 mg, 0.02 mmol, 0.1 equiv), Xantphos (23.2 mg, 0.04 mmol, 0.2 equiv), DIPEA (69.6 μl, 0.4 mmol, 2.0

equiv) and MeCN (0.2 M). A (2–5%) solution of petroleum ether and ethyl acetate was used as eluent for the purification of the desired product through column chromatography on silica gel. The product (**3ia**) was obtained as colorless solid, recording a yield of 55% (20 mg). Analytical data matched those reported in the literature.<sup>[12]</sup>

**<sup>1</sup>H NMR** (400 MHz, CDCl<sub>3</sub>) δ 7.61–7.59 (m, 2H), 7.47–7.42 (m, 2H), 7.39–7.34 (m, 2H), 7.20–7.18 (m, 1H), 7.14 (t, *J* = 2.3 Hz, 1H), 6.91 (dd, *J* = 8.3, 2.6 Hz, 1H), 3.87 (s, 3H).

**<sup>13</sup>C NMR** (101 MHz, CDCl<sub>3</sub>) δ 160.0, 142.9, 141.2, 129.9, 128.9, 127.6, 127.3, 119.8, 113.0, 112.8, 55.4.

### 2-chloro-1,1'-biphenyl (**3ja**)

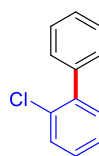

C<sub>12</sub>H<sub>9</sub>Cl  
M. W.: 188.6540 g/mol

Prepared according to the **GP-2**, using methyl 1-chloro-2-iodobenzene (**1j**) (47.6 mg, 0.2 mmol, 1.0 equiv), Benzene (**2a**) (178 μl, 2.0 mmol, 10.0 equiv), Pd(OAc)<sub>2</sub> (4.4 mg, 0.02 mmol, 0.1 equiv), Xantphos (23.2 mg, 0.04 mmol, 0.2 equiv), DIPEA (69.6 μl, 0.4 mmol, 2.0 equiv) and MeCN (0.2 M). A (2–5%) solution of petroleum ether and ethyl acetate was used as eluent for the purification of the desired product through column chromatography on silica gel. The product (**3ja**) was obtained as colorless solid, recording a yield of 85% (32 mg). Analytical data matched those reported in the literature.<sup>[13]</sup>

**<sup>1</sup>H NMR** (400 MHz, CDCl<sub>3</sub>) δ 7.49 (dd, *J* = 7.2, 1.9 Hz, 1H), 7.46–7.45 (m, 4H), 7.44–7.37 (m, 1H), 7.36–7.34 (m, 1H), 7.32 (dd, *J* = 6.8, 2.2 Hz, 1H), 7.30–7.27 (m, 1H).

**<sup>13</sup>C NMR** (101 MHz, CDCl<sub>3</sub>) δ 140.6, 139.5, 132.6, 131.5, 130.1, 129.6, 128.7, 128.2, 127.7, 127.0.

**1-phenylnaphthalene (3ka)**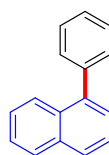

$C_{16}H_{12}$   
M. W.: 204.2720 g/mol

Prepared according to the **GP-2**, using methyl 1-iodonaphthalene (**1k**) (50.8 mg, 0.2 mmol, 1.0 equiv), Benzene (**2a**) (178  $\mu$ l, 2.0 mmol, 10.0 equiv), Pd(OAc)<sub>2</sub> (4.4 mg, 0.02 mmol, 0.1 equiv), Xantphos (23.2 mg, 0.04 mmol, 0.2 equiv), DIPEA (69.6  $\mu$ l, 0.4 mmol, 2.0 equiv) and MeCN (0.2 M). A (2–5%) solution of petroleum ether and ethyl acetate was used as eluent for the purification of the desired product through column chromatography on silica gel. The product (**3ka**) was obtained as colorless solid, recording a yield of 75% (31 mg). Analytical data matched those reported in the literature.<sup>[14]</sup>

**<sup>1</sup>H NMR** (400 MHz, CDCl<sub>3</sub>)  $\delta$  7.91 (d,  $J$  = 8.2 Hz, 2H), 7.87 (d,  $J$  = 8.3 Hz, 1H), 7.55 (d,  $J$  = 7.2 Hz, 1H), 7.52–7.48 (m, 5H), 7.46–7.42 (m, 3H).

**<sup>13</sup>C NMR** (101 MHz, CDCl<sub>3</sub>)  $\delta$  140.9, 140.4, 133.9, 131.7, 130.2, 128.9, 128.4, 128.0, 127.8, 127.4, 127.1, 126.2, 125.9, 125.5.

**4-phenylpyridine (3la)**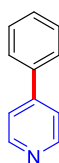

$C_{11}H_9N$   
M. W.: 155.2000 g/mol

Prepared according to the **GP-2**, using methyl 4-iodopyridine (**1l**) (40.8 mg, 0.2 mmol, 1.0 equiv), Benzene (**2a**) (178  $\mu$ l, 2.0 mmol, 10.0 equiv), Pd(OAc)<sub>2</sub> (4.4 mg, 0.02 mmol, 0.1 equiv), Xantphos (23.2 mg, 0.04 mmol, 0.2 equiv), DIPEA (69.6  $\mu$ l, 0.4 mmol, 2.0 equiv) and MeCN (0.2 M). A (2–5%) solution of petroleum ether and ethyl acetate was used as eluent for the purification of the desired product through column chromatography on silica gel. The product (**3la**) was obtained as colorless liquid, recording a yield of 45% (16 mg). Analytical data matched those reported in the literature.<sup>[15]</sup>

**<sup>1</sup>H NMR** (400 MHz, CDCl<sub>3</sub>)  $\delta$  8.67 (s, 2H), 7.66–7.63 (m, 2H), 7.52–7.44 (m, 5H).

$^{13}\text{C}$  NMR (101 MHz,  $\text{CDCl}_3$ )  $\delta$  150.4, 129.3, 129.2 (2C), 127.2, 121.8 (2C).

### 2-methoxy-4-phenylpyridine (**3ma**)

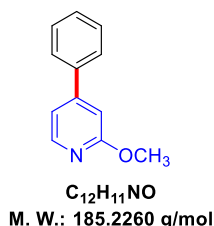

Prepared according to the **GP-2**, using methyl 4-iodo-2-methoxypyridine (**1m**) (47 mg, 0.2 mmol, 1.0 equiv), Benzene (**2a**) (178  $\mu\text{l}$ , 2.0 mmol, 10.0 equiv),  $\text{Pd}(\text{OAc})_2$  (4.4 mg, 0.02 mmol, 0.1 equiv), Xantphos (23.2 mg, 0.04 mmol, 0.2 equiv), DIPEA (69.6  $\mu\text{l}$ , 0.4 mmol, 2.0 equiv) and MeCN (0.2 M). A (2–5%) solution of petroleum ether and ethyl acetate was used as eluent for the purification of the desired product through column chromatography on silica gel. The product (**3ma**) was obtained as colorless liquid, recording a yield of 55% (20 mg). Analytical data matched those reported in the literature.<sup>[16]</sup>

$^1\text{H}$  NMR (400 MHz,  $\text{CDCl}_3$ )  $\delta$  8.21 (d,  $J$  = 5.5 Hz, 1H), 7.63–7.60 (m, 2H), 7.49–7.41 (m, 3H), 7.11 (dd,  $J$  = 5.4, 1.7 Hz, 1H), 6.96 (s, 1H), 3.99 (s, 3H).

$^{13}\text{C}$  NMR (101 MHz,  $\text{CDCl}_3$ )  $\delta$  165.0, 151.3, 147.3, 138.4, 129.1, 129.1, 127.1, 115.5, 108.6, 53.7.

### 3-fluoro-4-phenylpyridine (**3na**)

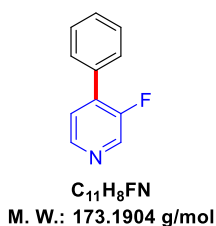

Prepared according to the **GP-2**, using methyl 3-fluoro-4-iodopyridine (**1n**) (44.4 mg, 0.2 mmol, 1.0 equiv), Benzene (**2a**) (178  $\mu\text{l}$ , 2.0 mmol, 10.0 equiv),  $\text{Pd}(\text{OAc})_2$  (4.4 mg, 0.02 mmol, 0.1 equiv), Xantphos (23.2 mg, 0.04 mmol, 0.2 equiv), DIPEA (69.6  $\mu\text{l}$ , 0.4 mmol, 2.0 equiv) and MeCN (0.2 M). A (2–5%) solution of petroleum ether and ethyl acetate was used as eluent for the purification of the desired product through column chromatography on silica gel. The product (**3na**) was obtained as colorless liquid, recording a yield of 70% (24 mg).

**HRMS (ESI):**  $m/z$   $[M+H]^+$  Calculated for  $[C_{11}H_9FN]^+$  : 174.0719; Found 174.0725.

**$^1H$  NMR** (400 MHz,  $CDCl_3$ )  $\delta$  8.54 (d,  $J$  = 2.6 Hz, 1H), 8.47 (d,  $J$  = 5.1 Hz, 1H), 7.63–7.60 (m, 2H), 7.52–7.46 (m, 3H), 7.42–7.39 (m, 1H).

**$^{13}C$  NMR** (101 MHz,  $CDCl_3$ )  $\delta$  156.8 (d,  $J$  = 257.0 Hz), 146.1 (d,  $J$  = 5.5 Hz), 139.2 (d,  $J$  = 25.9 Hz), 136.2 (d,  $J$  = 10.6 Hz), 133.1, 129.4, 129.0, 124.4.

**$^{19}F$  NMR** (376 MHz,  $CDCl_3$ )  $\delta$  -132.85 (1F).

### 2-chloro-4-phenylpyridine (30a)

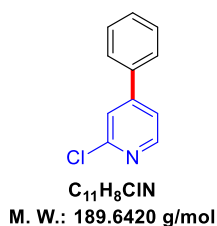

Prepared according to the **GP-2**, using methyl 2-chloro-4-iodopyridine (**1o**) (47.8 mg, 0.2 mmol, 1.0 equiv), Benzene (**2a**) (178  $\mu$ l, 2.0 mmol, 10.0 equiv),  $Pd(OAc)_2$  (4.4 mg, 0.02 mmol, 0.1 equiv), Xantphos (23.2 mg, 0.04 mmol, 0.2 equiv), DIPEA (69.6  $\mu$ l, 0.4 mmol, 2.0 equiv) and MeCN (0.2 M). A (2–5%) solution of petroleum ether and ethyl acetate was used as eluent for the purification of the desired product through column chromatography on silica gel. The product (**30a**) was obtained as colorless liquid, recording a yield of 75% (28 mg).

**HRMS (ESI):**  $m/z$   $[M+H]^+$  Calculated for  $[C_{11}H_9ClN]^+$  : 190.0424; Found 190.0435.

**$^1H$  NMR** (400 MHz,  $CDCl_3$ )  $\delta$  8.42 (d,  $J$  = 5.1 Hz, 1H), 7.62–7.59 (m, 2H), 7.54 (s, 1H), 7.52–7.46 (m, 3H), 7.43 (dd,  $J$  = 5.4, 1.7 Hz, 1H).

**$^{13}C$  NMR** (101 MHz,  $CDCl_3$ )  $\delta$  152.3, 151.7, 150.1, 136.9, 129.8, 129.4, 127.2, 122.2, 120.6.

### 3-phenylpyridine (3pa)

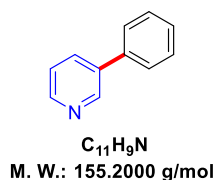

Prepared according to the **GP-2**, using methyl 3-iodopyridine (**1p**) (40.8 mg, 0.2 mmol, 1.0 equiv), Benzene (**2a**) (178  $\mu$ l, 2.0 mmol, 10.0 equiv),  $Pd(OAc)_2$  (4.4 mg, 0.02 mmol, 0.1 equiv), Xantphos (23.2 mg, 0.04 mmol, 0.2 equiv), DIPEA (69.6  $\mu$ l, 0.4 mmol, 2.0 equiv) and

MeCN (0.2 M). A (2–5%) solution of petroleum ether and ethyl acetate was used as eluent for the purification of the desired product through column chromatography on silica gel. The product (**3pa**) was obtained as colorless liquid, recording a yield of 65% (20 mg).

**HRMS (ESI):**  $m/z$   $[M+H]^+$  Calculated for  $[C_{11}H_{10}N]^+$  : 156.0808; Found 156.0813.

**$^1H$  NMR** (400 MHz,  $CDCl_3$ )  $\delta$  8.85 (d,  $J$  = 2.3 Hz, 1H), 8.59 (dd,  $J$  = 4.9, 1.6 Hz, 1H), 7.88 (dt,  $J$  = 8.2, 2.2 Hz, 1H), 7.60–7.57 (m, 2H), 7.51–7.46 (m, 2H), 7.43–7.36 (m, 2H).

**$^{13}C$  NMR** (101 MHz,  $CDCl_3$ )  $\delta$  148.6, 148.5, 138.0, 136.8, 134.5, 129.2, 128.3, 127.3, 123.7.

### 2-phenylthiophene (**3qa**)

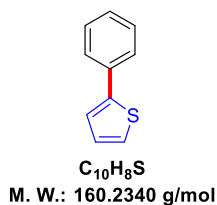

Prepared according to the **GP-2**, using methyl 2-iodothiophene (**1q**) (42 mg, 0.2 mmol, 1.0 equiv), Benzene (**2a**) (178  $\mu$ l, 2.0 mmol, 10.0 equiv),  $Pd(OAc)_2$  (4.4 mg, 0.02 mmol, 0.1 equiv), Xantphos (23.2 mg, 0.04 mmol, 0.2 equiv), DIPEA (69.6  $\mu$ l, 0.4 mmol, 2.0 equiv) and MeCN (0.2 M). A (2–5%) solution of petroleum ether and ethyl acetate was used as eluent for the purification of the desired product through column chromatography on silica gel. The product (**3qa**) was obtained as colorless liquid, recording a yield of 75% (24 mg).

**HRMS (ESI):**  $m/z$   $[M+H]^+$  Calculated for  $[C_{10}H_9S]^+$  : 161.0425; Found 161.0435.

**$^1H$  NMR** (400 MHz,  $CDCl_3$ )  $\delta$  7.65–7.62 (m, 2H), 7.42–7.37 (m, 2H), 7.34–7.28 (m, 3H), 7.11–7.09 (m, 1H).

**$^{13}C$  NMR** (101 MHz,  $CDCl_3$ )  $\delta$  144.5, 134.5, 129.0, 128.1, 127.6, 126.1, 124.9, 123.2.

### 5-phenylpyrimidine (**3ra**)

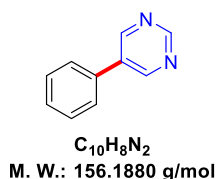

Prepared according to the **GP-2**, using methyl 5-iodopyrimidine (**1r**) (41 mg, 0.2 mmol, 1.0 equiv), Benzene (**2a**) (178  $\mu$ l, 2.0 mmol, 10.0 equiv),  $Pd(OAc)_2$  (4.4 mg, 0.02 mmol, 0.1



equiv), Xantphos (23.2 mg, 0.04 mmol, 0.2 equiv), DIPEA (69.6  $\mu$ l, 0.4 mmol, 2.0 equiv) and MeCN (0.2 M). A (2–5%) solution of petroleum ether and ethyl acetate was used as eluent for the purification of the desired product through column chromatography on silica gel. The product (**3ra**) was obtained as colorless liquid, recording a yield of 70% (22 mg). Analytical data matched those reported in the literature.<sup>[17]</sup>

**<sup>1</sup>H NMR** (400 MHz, CDCl<sub>3</sub>)  $\delta$  9.20 (s, 1H), 8.95 (s, 2H), 7.60–7.56 (m, 2H), 7.54–7.50 (m, 2H), 7.49–7.44 (m, 1H).

**<sup>13</sup>C NMR** (101 MHz, CDCl<sub>3</sub>)  $\delta$  157.6, 155.0, 134.5, 134.4, 129.6, 129.1, 127.1.

### 3-phenylbenzo[b]thiophene (**3sa**)

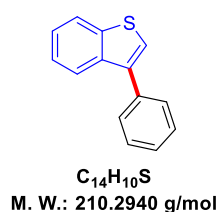

Prepared according to the **GP-2**, using methyl 3-iodobenzo[b]thiophene (**1s**) (52 mg, 0.2 mmol, 1.0 equiv), Benzene (**2a**) (178  $\mu$ l, 2.0 mmol, 10.0 equiv), Pd(OAc)<sub>2</sub> (4.4 mg, 0.02 mmol, 0.1 equiv), Xantphos (23.2 mg, 0.04 mmol, 0.2 equiv), DIPEA (69.6  $\mu$ l, 0.4 mmol, 2.0 equiv) and MeCN (0.2 M). A (2–5%) solution of petroleum ether and ethyl acetate was used as eluent for the purification of the desired product through column chromatography on silica gel. The product (**3sa**) was obtained as colorless liquid, recording a yield of 80% (34 mg). Analytical data matched those reported in the literature.<sup>[18]</sup>

**<sup>1</sup>H NMR** (400 MHz, CDCl<sub>3</sub>)  $\delta$  7.96–7.91 (m, 2H), 7.62–7.59 (m, 2H), 7.52–7.48 (m, 2H), 7.44–7.39 (m, 4H).

**<sup>13</sup>C NMR** (101 MHz, CDCl<sub>3</sub>)  $\delta$  140.8, 138.2, 138.0, 136.1, 129.1, 128.9, 127.7, 126.6, 124.6, 124.5, 123.6, 123.1.

### Arene variation

**Toluene as arene (**3ab**):** The product was obtained as a colorless solid, mixture of three isomers in a ratio of o:m:p = 3:1.7:1. Spectral data for all products matched the reported literature values. *ortho*<sup>[19]</sup>, *meta*<sup>[19]</sup>, *para*.<sup>[20]</sup>

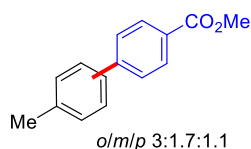

Prepared according to the **GP-2**, using methyl 4-iodobenzoate (**1a**) (52 mg, 0.2 mmol, 1.0 equiv), Toluene (**2b**) (106  $\mu$ l, 0.6 mmol, 3.0 equiv), Pd(OAc)<sub>2</sub> (4.4 mg, 0.02 mmol, 0.1 equiv), Xantphos (23.2 mg, 0.04 mmol, 0.2 equiv), DIPEA (69.6  $\mu$ l, 0.4 mmol, 2.0 equiv) and MeCN (0.2 M). A (2–5%) solution of petroleum ether and ethyl acetate was used as eluent for the purification of the desired product through column chromatography on silica gel. The product (**3ab**) was obtained as colorless solid, recording a yield of 60% (27 mg). Analytical data matched those reported in the literature *ortho*, *meta*, *para*.<sup>[19, 20]</sup>

**<sup>1</sup>H NMR** (400 MHz, CDCl<sub>3</sub>)  $\delta$  8.11–8.07 (m, 3.8H), 7.65 (dd,  $J$  = 8.2, 3.1 Hz, 1.9H), 7.55–7.52 (m, 0.75H), 7.46–7.44 (m, 1.12H), 7.42–7.39 (m, 2.03H), 7.36 (t,  $J$  = 7.5 Hz, 0.69H), 7.30–7.25 (m, 4.15H), 7.24–7.20 (m, 1.84H), 3.95 (s, 3H<sub>*ortho*</sub>), 3.94 (s, 2H<sub>*meta*</sub>), 3.94 (s, 1H<sub>*para*</sub>), 2.44 (s, 2H<sub>*meta*</sub>), 2.41 (s, 1H<sub>*para*</sub>), 2.27 (s, 3H<sub>*ortho*</sub>).

**<sup>13</sup>C NMR** (101 MHz, CDCl<sub>3</sub>)  $\delta$  167.2, 146.9, 145.9, 141.0, 140.1, 138.7, 138.3, 137.2, 135.3, 130.6, 130.2, 130.2, 129.8, 129.7, 129.6, 129.4, 129.0, 129.0, 128.9, 128.7, 128.5, 128.2, 128.0, 127.2, 127.2, 126.9, 126.0, 124.5, 52.3, 21.7, 21.3, 20.5.

***tert*-butylbenzene as arene (**3ac**):** The product was obtained as a colorless solid, mixture of two isomers in a ratio of m:p = 3:1.7. Spectral data for para product matched the reported literature values. *Para*.<sup>[21]</sup>

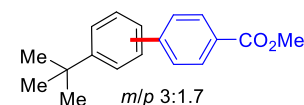

Prepared according to the **GP-2**, using methyl 4-iodobenzoate (**1a**) (52 mg, 0.2 mmol, 1.0 equiv), *tert*-butylbenzene (**2c**) (92  $\mu$ l, 0.6 mmol, 3.0 equiv), Pd(OAc)<sub>2</sub> (4.4 mg, 0.02 mmol, 0.1 equiv), Xantphos (23.2 mg, 0.04 mmol, 0.2 equiv), DIPEA (69.6  $\mu$ l, 0.4 mmol, 2.0 equiv) and MeCN (0.2 M). A (2–5%) solution of petroleum ether and ethyl acetate was used as eluent for the purification of the desired product through column chromatography on silica gel. The product (**3ac**) was obtained as colorless solid, recording a yield of 55% (30 mg). Analytical data matched those reported in the literature, *para*.<sup>[21]</sup>

**<sup>1</sup>H NMR** (400 MHz, CDCl<sub>3</sub>) δ 8.12–8.08 (m, 3.1H), 7.68–7.65 (m, 3.32H), 7.63–7.62 (m, 1.05H), 7.59–7.56 (m, 1.17H), 7.51–7.48 (m, 1.16H), 7.46–7.43 (m, 2.01H), 7.42–7.38 (m, 1.17H), 3.94 (s, 3H<sub>meta</sub>), 3.94 (s, 1.7H<sub>para</sub>), 1.38 (s, 9.0H<sub>meta</sub>), 1.37 (s, 5.3H<sub>para</sub>).

**<sup>13</sup>C NMR** (101 MHz, CDCl<sub>3</sub>) δ 167.2, 152.0, 146.4, 139.9, 130.2, 128.8, 127.3, 127.1, 127.0, 126.1, 125.4, 124.7, 124.5, 52.3, 35.0, 31.5, 31.4.

**methyl [1,1':2',1''-terphenyl]-4-carboxylate (3ad)**

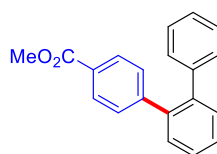

C<sub>20</sub>H<sub>16</sub>O<sub>2</sub>  
M. W.: 288.3460 g/mol

Prepared according to the **GP-2**, using methyl 4-iodobenzoate (**1a**) (52 mg, 0.2 mmol, 1.0 equiv), 1,1'-biphenyl (**2d**) (92.4 mg, 0.6 mmol, 3.0 equiv), Pd(OAc)<sub>2</sub> (4.4 mg, 0.02 mmol, 0.1 equiv), Xantphos (23.2 mg, 0.04 mmol, 0.2 equiv), DIPEA (69.6 μl, 0.4 mmol, 2.0 equiv) and MeCN (0.2 M). A (2–5%) solution of petroleum ether and ethyl acetate was used as eluent for the purification of the desired product through column chromatography on silica gel. The product (**3ad**) was obtained as colorless solid, recording a yield of 60% (35 mg). Analytical data matched those reported in the literature.<sup>[22]</sup>

**<sup>1</sup>H NMR** (400 MHz, CDCl<sub>3</sub>) δ 7.88 (d, *J* = 8.4 Hz, 2H), 7.46–7.42 (m, 4H), 7.23–7.19 (m, 5H), 7.14–7.09 (m, 2H), 3.89 (s, 3H).

**<sup>13</sup>C NMR** (101 MHz, CDCl<sub>3</sub>) δ 167.2, 146.5, 141.1, 140.8, 139.6, 130.9, 130.5, 130.0, 130.0, 129.3 (2C), 128.3, 128.2, 127.7, 126.9, 52.2.

**Fluorobenzene as arene (3ae):** The product was obtained as a colorless solid, mixture of three isomers in a ratio of *o*:*m*:*p* = 3:2.3:0.5. Spectral data for all products matched the reported literature values. *ortho*, *meta*, *para*.<sup>[23]</sup>

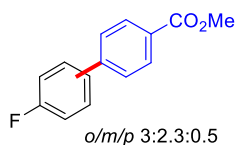

Prepared according to the **GP-2**, using methyl 4-iodobenzoate (**1a**) (52 mg, 0.2 mmol, 1.0 equiv), Fluorobenzene (**2e**) (193  $\mu$ l, 2.0 mmol, 10 equiv), Pd(OAc)<sub>2</sub> (4.4 mg, 0.02 mmol, 0.1 equiv), Xantphos (23.2 mg, 0.04 mmol, 0.2 equiv), DIPEA (69.6  $\mu$ l, 0.4 mmol, 2.0 equiv) and MeCN (0.2 M). A (2–5%) solution of petroleum ether and ethyl acetate was used as eluent for the purification of the desired product through column chromatography on silica gel. The product (**3ae**) was obtained as colorless solid, recording a yield of 65% (29 mg). Analytical data matched those reported in the literature *ortho*, *meta*, *para*.<sup>[23]</sup>

**<sup>1</sup>H NMR** (400 MHz, CDCl<sub>3</sub>)  $\delta$  8.13–8.09 (m, 1.88H), 7.68–7.61 (m, 1.98H), 7.61–7.57 (m, 0.28H), 7.48–7.40 (m, 1.28H), 7.39–7.30 (m, 0.94H), 7.24–7.20 (m, 0.50H), 7.18–7.15 (m, 0.47H), 7.13–7.06 (m, 0.37H) 3.95 (s, 3H).

**<sup>13</sup>C NMR** (101 MHz, CDCl<sub>3</sub>)  $\delta$  167.1, 167.0, 163.3 (d,  $J$  = 247.45 Hz), 159.8 (d,  $J$  = 250.48 Hz), 144.4 (d,  $J$  = 2.02 Hz), 142.4 (d,  $J$  = 8.08 Hz), 140.5, 130.8(d,  $J$  = 3.03 Hz), 130.6 (d,  $J$  = 8.08 Hz), 130.3, 129.9 (d,  $J$  = 8.08 Hz), 129.8, 129.5, 129.3, 129.2 (d,  $J$  = 8.08 Hz), 128.2, 128.0, 127.4, 127.2, 127.0, 124.7 (d,  $J$  = 4.04 Hz), 123.1, 116.4 (d,  $J$  = 22.2 Hz), 116.0 (d,  $J$  = 22.2 Hz), 115.1(d,  $J$  = 21.21 Hz), 114.3 (d,  $J$  = 22.2 Hz), 52.4 (t,  $J$  = 3.03 Hz).

**<sup>19</sup>F NMR** (376 MHz, CDCl<sub>3</sub>)  $\delta$  -112.54 ( $F_{meta}$ ), -114.11 ( $F_{para}$ ), -117.43 ( $F_{ortho}$ ).

#### methyl 2',4'-dimethyl-[1,1'-biphenyl]-4-carboxylate (**3af**)

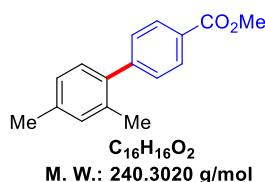

Prepared according to the **GP-2**, using methyl 4-iodobenzoate (**1a**) (52 mg, 0.2 mmol, 1.0 equiv), *m*-xylene (**2f**) (63.6  $\mu$ l, 0.6 mmol, 3.0 equiv), Pd(OAc)<sub>2</sub> (4.4 mg, 0.02 mmol, 0.1 equiv), Xantphos (23.2 mg, 0.04 mmol, 0.2 equiv), DIPEA (69.6  $\mu$ l, 0.4 mmol, 2.0 equiv) and MeCN (0.2 M). A (2–5%) solution of petroleum ether and ethyl acetate was used as eluent for the purification of the desired product through column chromatography on silica gel. The product (**3af**) was obtained as colorless solid, recording a yield of 56% (27 mg). Analytical data matched those reported in the literature.<sup>[24]</sup>

**<sup>1</sup>H NMR** (400 MHz, CDCl<sub>3</sub>)  $\delta$  8.10–8.06 (m, 2H), 7.41–7.37 (m, 2H), 7.14–7.07 (m, 3H), 3.94 (s, 3H), 2.37 (s, 3H), 2.24 (s, 3H).

$^{13}\text{C}$  NMR (101 MHz,  $\text{CDCl}_3$ )  $\delta$  167.3, 146.9, 138.1, 137.7, 135.1, 131.4, 129.6, 129.5, 129.5, 128.5, 126.8, 52.2, 21.2, 20.5.

**methyl 2',5'-dimethyl-[1,1'-biphenyl]-4-carboxylate (**3ag**)**

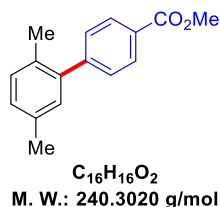

Prepared according to the **GP-2**, using methyl 4-iodobenzoate (**1a**) (52 mg, 0.2 mmol, 1.0 equiv), *p*-xylene (**2g**) (63.6  $\mu\text{l}$ , 0.6 mmol, 3.0 equiv),  $\text{Pd}(\text{OAc})_2$  (4.4 mg, 0.02 mmol, 0.1 equiv), Xantphos (23.2 mg, 0.04 mmol, 0.2 equiv), DIPEA (69.6  $\mu\text{l}$ , 0.4 mmol, 2.0 equiv) and MeCN (0.2 M). A (2–5%) solution of petroleum ether and ethyl acetate was used as eluent for the purification of the desired product through column chromatography on silica gel. The product (**3ag**) was obtained as colorless solid, recording a yield of 50% (24 mg). Analytical data matched those reported in the literature.<sup>[25]</sup>

$^1\text{H}$  NMR (400 MHz,  $\text{CDCl}_3$ )  $\delta$  8.09–8.06 (m, 2H), 7.41–7.38 (m, 2H), 7.17 (d,  $J$  = 7.8 Hz, 1H), 7.10 (d,  $J$  = 7.6 Hz, 1H), 7.05 (s, 1H), 3.95 (s, 3H), 2.36 (s, 3H), 2.22 (s, 3H).

$^{13}\text{C}$  NMR (101 MHz,  $\text{CDCl}_3$ )  $\delta$  167.3, 147.1, 140.8, 135.5, 132.1, 130.6, 130.4, 129.5, 129.4, 128.7, 128.6, 52.3, 21.0, 20.0.

**Naphthalene as arene (3ah):** Two products were obtained as a colorless solid. We are isolated separately. The reaction produces a mixture of two structural isomers. The ratio of the two products  $C_1:C_2 = 5:4$ .

**methyl 4-(naphthalen-1-yl)benzoate (3ah) (C<sub>1</sub>)**

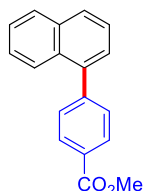

$C_{18}H_{14}O_2$   
M. W.: 262.3080 g/mol

Prepared according to the **GP-2**, using methyl 4-iodobenzoate (**1a**) (52 mg, 0.2 mmol, 1.0 equiv), naphthalene (**2h**) (76.8 mg, 0.6 mmol, 3.0 equiv),  $Pd(OAc)_2$  (4.4 mg, 0.02 mmol, 0.1 equiv), Xantphos (23.2 mg, 0.04 mmol, 0.2 equiv), DIPEA (69.6  $\mu$ l, 0.4 mmol, 2.0 equiv) and MeCN (0.2 M). A (2–5%) solution of petroleum ether and ethyl acetate was used as eluent for the purification of the desired product through column chromatography on silica gel. The product (**3ah**) (**C<sub>1</sub>**) was obtained as colorless solid, recording a yield of 40% (21 mg). Analytical data matched those reported in the literature.<sup>[26]</sup>

**<sup>1</sup>H NMR** (400 MHz,  $CDCl_3$ )  $\delta$  8.17 (d,  $J = 8.2$  Hz, 2H), 7.94–7.84 (m, 3H), 7.58 (d,  $J = 8.3$  Hz, 2H), 7.56–7.49 (m, 2H), 7.47–7.42 (m, 2H), 3.98 (s, 3H).

**<sup>13</sup>C NMR** (101 MHz,  $CDCl_3$ )  $\delta$  167.2, 145.7, 139.2, 133.9, 131.3, 130.3, 129.7, 129.1, 128.5, 128.4, 127.1, 126.5, 126.1, 125.7, 125.5, 52.4.

**methyl 4-(naphthalen-2-yl)benzoate (3ah) (C<sub>2</sub>)**

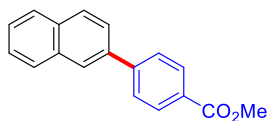

$C_{18}H_{14}O_2$   
M. W.: 262.3080 g/mol

Prepared according to the **GP-2**, using methyl 4-iodobenzoate (**1a**) (52 mg, 0.2 mmol, 1.0 equiv), naphthalene (**2h**) (76.8 mg, 0.6 mmol, 3.0 equiv),  $Pd(OAc)_2$  (4.4 mg, 0.02 mmol, 0.1 equiv), Xantphos (23.2 mg, 0.04 mmol, 0.2 equiv), DIPEA (69.6  $\mu$ l, 0.4 mmol, 2.0 equiv) and MeCN (0.2 M). A (2–5%) solution of petroleum ether and ethyl acetate was used as eluent for the purification of the desired product through column chromatography on silica gel. The

product (**3ah**) (**C<sub>2</sub>**) was obtained as colorless solid, recording a yield of 30% (16 mg). Analytical data matched those reported in the literature.<sup>[27]</sup>

**<sup>1</sup>H NMR** (400 MHz, CDCl<sub>3</sub>)  $\delta$  8.15 (d,  $J$  = 8.3 Hz, 2H), 8.09 (s, 1H), 7.96–7.87 (m, 3H), 7.80 (d,  $J$  = 8.4 Hz, 2H), 7.77 (dd,  $J$  = 8.5, 1.9 Hz, 1H), 7.56–7.49 (m, 2H), 3.96 (s, 3H).

**<sup>13</sup>C NMR** (101 MHz, CDCl<sub>3</sub>)  $\delta$  167.2, 145.7, 137.4, 133.7, 133.1, 130.3, 129.0, 128.8, 128.5, 127.8, 127.4, 126.7, 126.6, 126.5, 125.4, 52.4.

**methyl 2',4',6'-trimethyl-[1,1'-biphenyl]-4-carboxylate (**3ai**)**

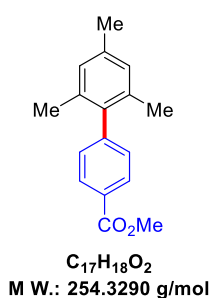

Prepared according to the **GP-2**, using methyl 4-iodobenzoate (**1a**) (52 mg, 0.2 mmol, 1.0 equiv), mesitylene (**2i**) (72 mg, 0.6 mmol, 3.0 equiv), Pd(OAc)<sub>2</sub> (4.4 mg, 0.02 mmol, 0.1 equiv), Xantphos (23.2 mg, 0.04 mmol, 0.2 equiv), DIPEA (69.6  $\mu$ l, 0.4 mmol, 2.0 equiv) and MeCN (0.2 M). A (2–5%) solution of petroleum ether and ethyl acetate was used as eluent for the purification of the desired product through column chromatography on silica gel. The product (**3ai**) was obtained as colorless solid, recording a yield of 65% (33 mg).

**HRMS (ESI):**  $m/z$  [M+H]<sup>+</sup> Calculated for [C<sub>17</sub>H<sub>19</sub>O<sub>2</sub>]<sup>+</sup> : 255.1385; Found 255.1392.

**<sup>1</sup>H NMR** (400 MHz, CDCl<sub>3</sub>)  $\delta$  8.09 (d,  $J$  = 8.1 Hz, 2H), 7.23 (d,  $J$  = 8.4 Hz, 2H), 6.95 (s, 2H), 3.94 (s, 3H), 2.33 (s, 3H), 1.98 (s, 6H).

**<sup>13</sup>C NMR** (101 MHz, CDCl<sub>3</sub>)  $\delta$  167.3, 146.4, 138.1, 137.2, 135.7, 129.9, 129.6, 128.3, 52.3, 21.2, 20.8.

**Anthracene as arene (**3aj**):** The products were obtained as a colorless solid. The reaction produces a mixture of three structural isomers. The major product Methyl 4-(anthracen-9-yl)benzoate (**3aj**) (constituting ~35% of the total yield 65%) is the stable isomer, while the other two positional isomers in a ratio = 3:1.

**methyl 4-(anthracen-9-yl)benzoate (3aj) (C<sup>10</sup>)**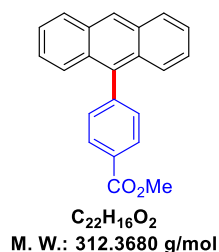

Prepared according to the **GP-2**, using methyl 4-iodobenzoate (**1a**) (52 mg, 0.2 mmol, 1.0 equiv), anthracene (**2j**) (108 mg, 0.6 mmol, 3.0 equiv), Pd(OAc)<sub>2</sub> (4.4 mg, 0.02 mmol, 0.1 equiv), Xantphos (23.2 mg, 0.04 mmol, 0.2 equiv), DIPEA (69.6  $\mu$ l, 0.4 mmol, 2.0 equiv) and MeCN (0.2 M). A (2–5%) solution of petroleum ether and ethyl acetate was used as eluent for the purification of the desired product through column chromatography on silica gel. The product (**3aj**) was obtained as colorless solid, recording a yield of 35% (22 mg). Analytical data matched those reported in the literature.<sup>[27]</sup>

**<sup>1</sup>H NMR** (400 MHz, CDCl<sub>3</sub>)  $\delta$  8.53 (s, 1H), 8.26 (d,  $J$  = 8.2 Hz, 2H), 8.06 (d,  $J$  = 8.4 Hz, 2H), 7.58 (d,  $J$  = 8.7 Hz, 2H), 7.54–7.52 (m, 2H), 7.49–7.45 (m, 2H), 7.38–7.34 (m, 2H), 4.01 (s, 3H).

**<sup>13</sup>C NMR** (101 MHz, CDCl<sub>3</sub>)  $\delta$  167.3, 144.1, 135.8, 131.6, 131.4, 123.0, 129.8, 129.5, 128.6, 127.3, 126.5, 125.8, 125.3, 52.4.

**methyl 4-(anthracen-9-yl)benzoate (3aj) (C<sub>1</sub> and C<sub>2</sub>)**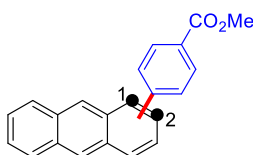

**<sup>1</sup>H NMR** (400 MHz, CDCl<sub>3</sub>)  $\delta$  8.51 (s, 1H), 8.39 (s, 1H), 8.23 (d,  $J$  = 8.0 Hz, 2.04H), 8.11–8.01 (m, 2.96H), 7.87 (d,  $J$  = 8.2 Hz, 0.99H), 7.74 (d,  $J$  = 7.9 Hz, 0.4H) 7.68 (d,  $J$  = 8.2 Hz, 2.13H), 7.63–7.60 (m, 0.81H), 7.55–7.48 (m, 2.74H), 7.47–7.39 (m, 3.05H), 7.37–7.33 (m, 0.94H), 4.00 (s, 3H), 3.96 (s, 0.96H).

**<sup>13</sup>C NMR** (101 MHz, CDCl<sub>3</sub>)  $\delta$  167.3, 145.9, 139.3, 133.0, 132.0, 131.9, 131.6, 130.3, 129.9, 129.9, 129.3, 129.0, 128.8, 128.7, 128.1, 128.0, 127.0, 126.9, 126.5, 126.1, 125.9, 125.8, 125.7, 125.5, 124.9, 124.7, 124.2, 52.4.



**methyl 4-(4-methylquinolin-5-yl)benzoate (3ak)**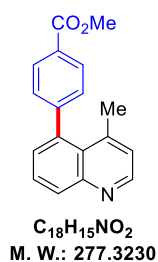

Prepared according to the **GP-2**, using methyl 4-iodobenzoate (**1a**) (52 mg, 0.2 mmol, 1.0 equiv), 4-methylquinoline (**2k**) (85.9  $\mu$ l, 0.6 mmol, 3.0 equiv), Pd(OAc)<sub>2</sub> (4.4 mg, 0.02 mmol, 0.1 equiv), Xantphos (23.2 mg, 0.04 mmol, 0.2 equiv), DIPEA (69.6  $\mu$ l, 0.4 mmol, 2.0 equiv) and MeCN (0.2 M). A (2–5%) solution of petroleum ether and ethyl acetate was used as eluent for the purification of the desired product through column chromatography on silica gel. The product (**3ak**) was obtained as colorless liquid, recording a yield of 43% (24 mg).

**MS (ESI)** m/z: [M + H]<sup>+</sup> Calcd for [C<sub>18</sub>H<sub>16</sub>NO<sub>2</sub>]<sup>+</sup>: 278.12; Found 278.20.

**<sup>1</sup>H NMR** (400 MHz, CDCl<sub>3</sub>)  $\delta$  8.77 (d,  $J$  = 4.3 Hz, 1H), 8.16 (dd,  $J$  = 8.6, 1.3 Hz, 1H), 8.10 (d,  $J$  = 8.2 Hz, 2H), 7.68 (dd,  $J$  = 8.4, 7.0 Hz, 1H), 7.43 (d,  $J$  = 8.2 Hz, 2H), 7.35 (dd,  $J$  = 7.0, 1.6 Hz, 1H), 7.15 (d,  $J$  = 4.4 Hz, 1H), 3.97 (s, 3H), 2.01 (s, 3H).

**<sup>13</sup>C NMR** (101 MHz, CDCl<sub>3</sub>)  $\delta$  167.1, 150.1, 149.2, 148.8, 145.4, 139.4, 130.7, 129.7, 129.6, 129.3 (2C), 127.9, 126.7, 124.6, 52.4, 24.7.

**methyl 4-(quinoxalin-5-yl)benzoate (3al)**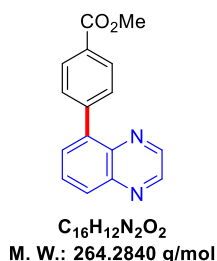

Prepared according to the **GP-2**, using methyl 4-iodobenzoate (**1a**) (52 mg, 0.2 mmol, 1.0 equiv), quinoxaline (**2l**) (78 mg, 0.6 mmol, 3.0 equiv), Pd(OAc)<sub>2</sub> (4.4 mg, 0.02 mmol, 0.1 equiv), Xantphos (23.2 mg, 0.04 mmol, 0.2 equiv), DIPEA (69.6  $\mu$ l, 0.4 mmol, 2.0 equiv) and MeCN (0.2 M). A (2–5%) solution of petroleum ether and ethyl acetate was used as eluent for

the purification of the desired product through column chromatography on silica gel. The product (**3al**) was obtained as colorless solid, recording a yield of 57% (30 mg).

**MS (ESI)**  $m/z$ :  $[M + H]^+$  Calcd for  $[C_{16}H_{13}N_2O_2]^+$ : 265.10; Found 265.23.

**$^1H$  NMR** (400 MHz,  $CDCl_3$ )  $\delta$  8.89 (d,  $J = 1.5$  Hz, 2H), 8.19–8.16 (m, 3H), 7.89–7.82 (m, 2H), 7.75 (d,  $J = 8.3$  Hz, 2H), 3.96 (s, 3H).

**$^{13}C$  NMR** (101 MHz,  $CDCl_3$ )  $\delta$  167.2, 145.0, 145.0, 143.0, 141.0, 140.2, 130.8 (2C), 130.0, 129.8, 129.5 (2C), 129.5, 52.4.

**methyl 4-(1H-pyrrol-2-yl)benzoate (3am)**

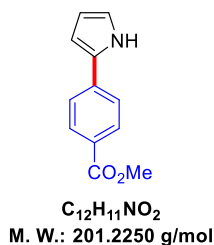

Prepared according to the **GP-2**, using methyl 4-iodobenzoate (**1a**) (52 mg, 0.2 mmol, 1.0 equiv), 1H-pyrrole (**2m**) (134  $\mu$ l, 2.0 mmol, 10.0 equiv),  $Pd(OAc)_2$  (4.4 mg, 0.02 mmol, 0.1 equiv), Xantphos (23.2 mg, 0.04 mmol, 0.2 equiv), DIPEA (69.6  $\mu$ l, 0.4 mmol, 2.0 equiv) and MeCN (0.2 M). A (2–5%) solution of petroleum ether and ethyl acetate was used as eluent for the purification of the desired product through column chromatography on silica gel. The product (**3am**) was obtained as colorless liquid, recording a yield of 55% (22 mg). Analytical data matched those reported in the literature.<sup>[28]</sup>

**$^1H$  NMR** (400 MHz,  $CDCl_3$ )  $\delta$  8.61 (br, 1H), 8.03 (d,  $J = 8.7$  Hz, 2H), 7.52 (d,  $J = 8.3$  Hz, 2H), 6.94–6.92 (m, 1H), 6.67–6.65 (m, 1H), 6.34–6.32 (m, 1H), 3.92 (s, 3H).

**$^{13}C$  NMR** (101 MHz,  $CDCl_3$ )  $\delta$  167.1, 136.9, 131.1, 130.5, 127.4, 123.3, 120.4, 110.8, 108.1, 52.2.

**methyl 4-(furan-2-yl)benzoate (3an)**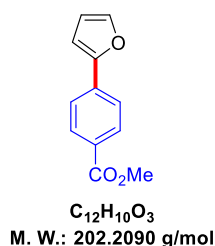

Prepared according to the **GP-2**, using methyl 4-iodobenzoate (**1a**) (52 mg, 0.2 mmol, 1.0 equiv), Furan (**2n**) (136  $\mu$ l, 2 mmol, 10.0 equiv), Pd(OAc)<sub>2</sub> (4.4 mg, 0.02 mmol, 0.1 equiv), Xantphos (23.2 mg, 0.04 mmol, 0.2 equiv), DIPEA (69.6  $\mu$ l, 0.4 mmol, 2.0 equiv) and MeCN (0.2 M). A (2–5%) solution of petroleum ether and ethyl acetate was used as eluent for the purification of the desired product through column chromatography on silica gel. The product (**3an**) was obtained as colorless liquid, recording a yield of 60% (24 mg). Analytical data matched those reported in the literature.<sup>[29]</sup>

**<sup>1</sup>H NMR** (400 MHz, CDCl<sub>3</sub>)  $\delta$  8.05 (d,  $J$  = 8.3 Hz, 2H), 7.73 (d,  $J$  = 8.3 Hz, 2H), 7.52 (d,  $J$  = 1.6 Hz, 1H), 6.79 (d,  $J$  = 3.6 Hz, 1H), 6.51 (dd,  $J$  = 3.2, 1.8 Hz, 1H), 3.92 (s, 3H).

**<sup>13</sup>C NMR** (101 MHz, CDCl<sub>3</sub>)  $\delta$  167.0, 153.1, 143.3, 134.9, 130.3, 128.6, 123.5, 112.2, 107.4, 52.3.

**methyl 4-(thiophen-2-yl)benzoate (3ao)**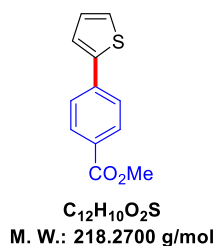

Prepared according to the **GP-2**, using methyl 4-iodobenzoate (**1a**) (52 mg, 0.2 mmol, 1.0 equiv), Thiophene (**2o**) (168  $\mu$ l, 2 mmol, 10.0 equiv), Pd(OAc)<sub>2</sub> (4.4 mg, 0.02 mmol, 0.1 equiv), Xantphos (23.2 mg, 0.04 mmol, 0.2 equiv), DIPEA (69.6  $\mu$ l, 0.4 mmol, 2.0 equiv) and MeCN (0.2 M). A (2–5%) solution of petroleum ether and ethyl acetate was used as eluent for the purification of the desired product through column chromatography on silica gel. The product (**3ao**) was obtained as colorless liquid, recording a yield of 60% (26 mg). Analytical data matched those reported in the literature.<sup>[30]</sup>

**<sup>1</sup>H NMR** (400 MHz, CDCl<sub>3</sub>) δ 8.04 (d, *J* = 8.3 Hz, 2H), 7.68 (d, *J* = 8.3 Hz, 2H), 7.44–7.42 (m, 1H), 7.37 (d, *J* = 4.9 Hz, 1H), 7.13–7.11 (m, 1H), 3.93 (s, 3H).

**<sup>13</sup>C NMR** (101 MHz, CDCl<sub>3</sub>) δ 166.9, 143.2, 138.8, 130.4, 128.9, 128.5, 126.4, 125.7, 124.6, 52.3.

**2-isopropyl-5-methylcyclohexyl [1,1'-biphenyl]-4-carboxylate (3ta)**

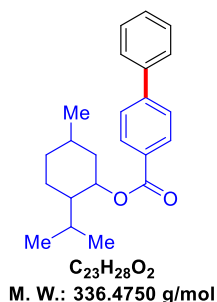

Prepared according to the **GP-2**, using 2-isopropyl-5-methylcyclohexyl 4-iodobenzoate (**1t**) (77.2 mg, 0.2 mmol, 1.0 equiv), Benzene (**2a**) (178 μl, 2.0 mmol, 10.0 equiv), Pd(OAc)<sub>2</sub> (4.4 mg, 0.02 mmol, 0.1 equiv), Xantphos (23.2 mg, 0.04 mmol, 0.2 equiv), DIPEA (69.6 μl, 0.4 mmol, 2.0 equiv) and MeCN (0.2 M). A (2–5%) solution of petroleum ether and ethyl acetate was used as eluent for the purification of the desired product through column chromatography on silica gel. The product (**3ta**) was obtained as colorless solid, recording a yield of 82% (55 mg). Analytical data matched those reported in the literature.<sup>[31]</sup>

**<sup>1</sup>H NMR** (400 MHz, CDCl<sub>3</sub>) δ 8.14–8.11 (m, 2H), 7.68–7.61 (m, 4H), 7.50–7.44 (m, 2H), 7.42–7.38 (m, 1H), 4.97 (td, *J* = 10.9, 4.4 Hz, 1H), 2.18–2.12 (m, 1H), 2.04–1.95 (m, 1H), 1.78–1.72 (m, 2H), 1.62–1.53 (m, 3H), 1.17–1.09 (m, 2H), 0.94 (dd, *J* = 6.7, 3.0 Hz, 6H), 0.82 (d, *J* = 7.1 Hz, 3H).

**<sup>13</sup>C NMR** (101 MHz, CDCl<sub>3</sub>) δ 166.1, 145.6, 140.3, 132.8, 130.2, 129.7, 129.1, 128.4, 128.2, 127.4, 127.2, 75.0, 47.4, 41.1, 34.5, 31.6, 26.6, 23.8, 22.2, 20.9, 16.7.

**(10R,13R)-10,13-dimethyl-17-((R)-6-methylheptan-2-yl)-  
2,3,4,7,8,9,10,11,12,13,14,15,16,17-tetradecahydro-1H-cyclopenta[a]phenanthren-3-yl  
[1,1'-biphenyl]-4-carboxylate (Cholesterol) (3ua)**

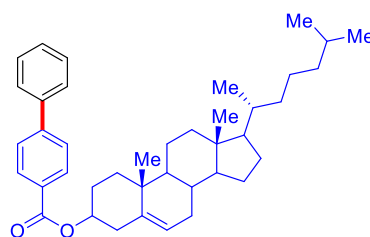

$C_{40}H_{54}O_2$   
M. W.: 566.8700 g/mol

Prepared according to the **GP-2**, using Cholesterol tag iodoester (**1u**) (123.3 mg, 0.2 mmol, 1.0 equiv), Benzene (**2a**) (178  $\mu$ l, 2.0 mmol, 10.0 equiv), Pd(OAc)<sub>2</sub> (4.4 mg, 0.02 mmol, 0.1 equiv), Xantphos (23.2 mg, 0.04 mmol, 0.2 equiv), DIPEA (69.6  $\mu$ l, 0.4 mmol, 2.0 equiv) and MeCN (0.2 M). A (2–5%) solution of petroleum ether and ethyl acetate was used as eluent for the purification of the desired product through column chromatography on silica gel. The product (**3ua**) was obtained as colorless solid, recording a yield of 45% (51 mg). Analytical data matched those reported in the literature.<sup>[32]</sup>

**<sup>1</sup>H NMR** (400 MHz, CDCl<sub>3</sub>)  $\delta$  8.16 (d,  $J$  = 8.2 Hz, 2H), 7.67–7.62 (m, 4H), 7.47 (t,  $J$  = 7.5 Hz, 2H), 7.42–7.37 (m, 1H), 5.44 (d,  $J$  = 3.9 Hz, 1H), 4.93–4.85 (m, 1H), 2.49 (d,  $J$  = 8.0 Hz, 2H), 2.05–1.90 (m, 4H), 1.88–1.80 (m, 1H), 1.78–1.69 (m, 1H), 1.63–1.56 (m, 2H), 1.54–1.44 (m, 4H), 1.39–1.33 (m, 3H), 1.29–1.21 (m, 3H), 1.19–1.12 (m, 4H), 1.08 (s, 3H), 1.06–0.97 (m, 4H), 0.93 (d,  $J$  = 6.5 Hz, 3H), 0.88 (d,  $J$  = 1.8 Hz, 3H), 0.87 (d,  $J$  = 1.9 Hz, 3H), 0.70 (s, 3H).

**<sup>13</sup>C NMR** (101 MHz, CDCl<sub>3</sub>)  $\delta$  166.0, 145.6, 140.2, 139.8, 130.2, 129.7, 129.0, 128.2, 127.4, 127.1, 122.9, 74.7, 56.8, 56.2, 50.1, 42.4, 39.8, 39.6, 38.4, 37.2, 36.8, 36.3, 35.9, 32.1, 32.0, 28.4, 28.2, 28.0, 24.4, 24.0, 23.0, 22.7, 21.2, 19.5, 18.9, 12.0.

(1*s*,4*R*,4'*S*,6*a*'*R*,6*b*'*S*,8*a*'*S*,8*b*'*R*,9'*S*,11*a*'*S*,12*a*'*S*,12*b*'*S*)-4,6*a*',8*a*',9'-tetramethyl-1',3',4',5',6',6*a*',6*b*',7',8',8*a*',8*b*',9',11*a*',12',12*a*',12*b*'-hexadecahydrospiro[cyclohexane-1,10'-naphtho[2,1':4,5]indeno[2,1-*b*]furan]-4'-yl [1,1'-biphenyl]-4-carboxylate (Nitogenin) (**3va**)

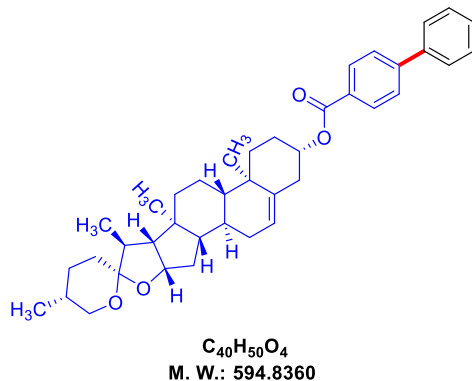

Prepared according to the **GP-2**, using Nitogenin tag iodoester (**1v**) (128.8 mg, 0.2 mmol, 1.0 equiv), Benzene (**2a**) (178  $\mu$ l, 2.0 mmol, 10.0 equiv), Pd(OAc)<sub>2</sub> (4.4 mg, 0.02 mmol, 0.1 equiv), Xantphos (23.2 mg, 0.04 mmol, 0.2 equiv), DIPEA (69.6  $\mu$ l, 0.4 mmol, 2.0 equiv) and MeCN (0.2 M). A (2–5%) solution of petroleum ether and ethyl acetate was used as eluent for the purification of the desired product through column chromatography on silica gel. The product (**3va**) was obtained as colorless solid, recording a yield of 80% (95 mg).

**MS (ESI)** *m/z*: [M + H]<sup>+</sup> Calcd for [C<sub>40</sub>H<sub>51</sub>O<sub>4</sub>]<sup>+</sup>: 595.38; Found 595.47.

**<sup>1</sup>H NMR** (400 MHz, CDCl<sub>3</sub>)  $\delta$  8.11 (d, *J* = 8.5 Hz, 2H), 7.67–7.61 (m, 4H), 7.47 (t, *J* = 7.5 Hz, 2H), 7.41–7.37 (m, 1H), 5.43 (d, *J* = 4.9 Hz, 1H), 4.92–4.84 (m, 1H), 4.45–4.39 (m, 1H), 3.50–3.46 (m, 1H), 3.38 (t, *J* = 10.8 Hz, 1H), 2.49 (d, *J* = 8.1 Hz, 2H), 2.06–1.97 (m, 3H), 1.95–1.85 (m, 2H), 1.81–1.72 (m, 3H), 1.71–1.64 (m, 3H), 1.61–1.39 (m, 6H), 1.34–1.13 (m, 4H), 1.10 (s, 3H), 1.06–1.02 (m, 1H), 0.98 (d, *J* = 6.9 Hz, 3H), 0.79 (d, *J* = 6.9 Hz, 6H).

**<sup>13</sup>C NMR** (101 MHz, CDCl<sub>3</sub>)  $\delta$  166.0, 145.6, 140.2, 139.8, 130.2, 129.6, 129.1, 128.2, 127.4, 127.1, 122.6, 109.4, 81.0, 74.6, 67.0, 62.2, 56.6, 50.0, 41.7, 40.4, 39.9, 38.3, 37.1, 36.9, 32.2, 32.0, 31.5, 31.5, 30.4, 28.9, 28.0, 21.0, 19.6, 17.3, 16.4, 14.7.

**(2R)-2,5,7,8-tetramethyl-2-(4,8,12-trimethyltridecyl)chroman-6-yl [1,1'-biphenyl]-4-carboxylate (Vitamin E) (3wa)**

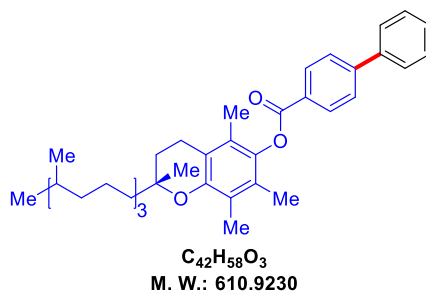

Prepared according to the **GP-2**, using Vitamin E tag iodoester (**1w**) (86 mg, 0.2 mmol, 1.0 equiv), Benzene (**2a**) (178  $\mu$ l, 2.0 mmol, 10.0 equiv), Pd(OAc)<sub>2</sub> (4.4 mg, 0.02 mmol, 0.1 equiv), Xantphos (23.2 mg, 0.04 mmol, 0.2 equiv), DIPEA (69.6  $\mu$ l, 0.4 mmol, 2.0 equiv) and MeCN (0.2 M). A (2–5%) solution of petroleum ether and ethyl acetate was used as eluent for the purification of the desired product through column chromatography on silica gel. The product (**3wa**) was obtained as colorless liquid, recording a yield of 75% (31 mg).

**MS (ESI)** m/z: [M + Na]<sup>+</sup> Calcd for [C<sub>42</sub>H<sub>58</sub>O<sub>3</sub>Na]<sup>+</sup>: 633.42; Found 633.40.

**<sup>1</sup>H NMR** (400 MHz, CDCl<sub>3</sub>)  $\delta$  8.33 (d,  $J$  = 8.2 Hz, 2H), 7.75 (d,  $J$  = 8.3 Hz, 2H), 7.68–7.66 (m, 2H), 7.52–7.48 (m, 2H), 7.45–7.41 (m, 1H), 2.64 (t,  $J$  = 6.8 Hz, 2H), 2.14 (s, 3H), 2.09 (s, 3H), 2.05 (s, 3H), 1.87–1.77 (m, 2H), 1.57–1.48 (m, 2H), 1.46–1.37 (m, 4H), 1.31–1.24 (m, 10H), 1.19–1.01 (m, 8H), 0.88 (s, 3H), 0.87 (s, 3H), 0.85 (s, 3H).

**<sup>13</sup>C NMR** (101 MHz, CDCl<sub>3</sub>)  $\delta$  165.2, 149.6, 146.3, 140.8, 140.1, 130.8, 129.1, 128.5, 128.4, 127.5, 127.4, 127.1, 125.3, 123.3, 117.6, 75.2, 40.6, 39.5, 37.5, 37.4, 32.9, 31.2, 29.8, 28.1, 25.0, 24.6, 24.3, 23.8, 22.9, 22.8, 21.2, 20.8, 19.9, 19.8, 13.2, 12.4, 12.0.

## 9. Experimental NMR data

## methyl [1,1'-biphenyl]-4-carboxylate (3aa)

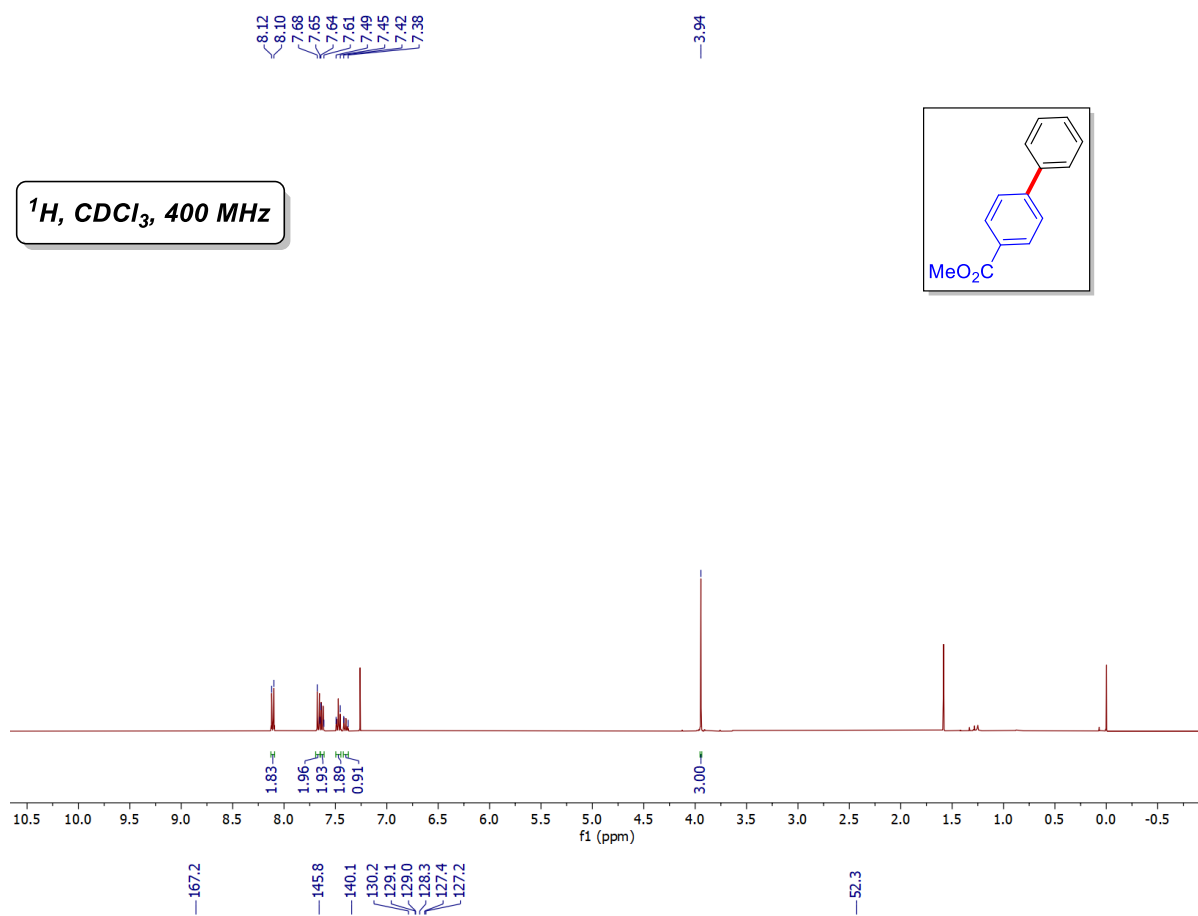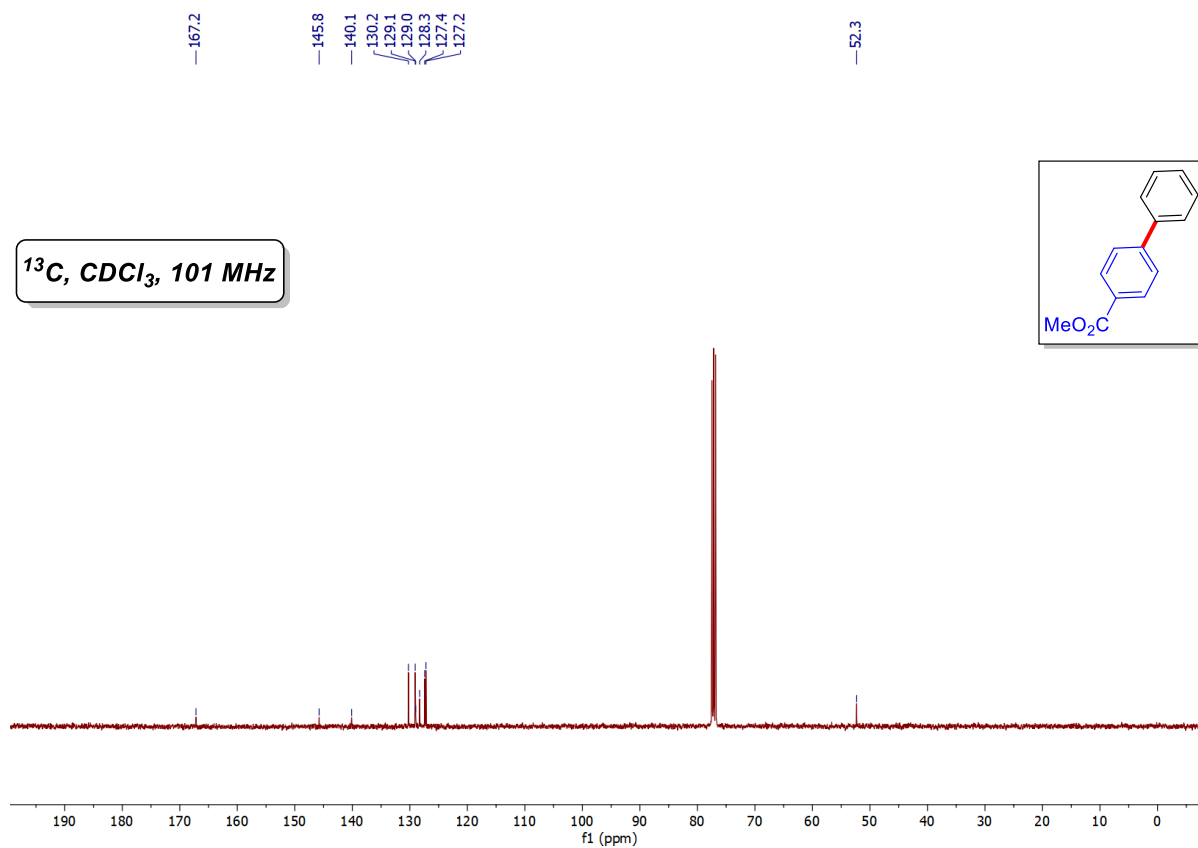



## benzyl [1,1'-biphenyl]-4-carboxylate (3ba)

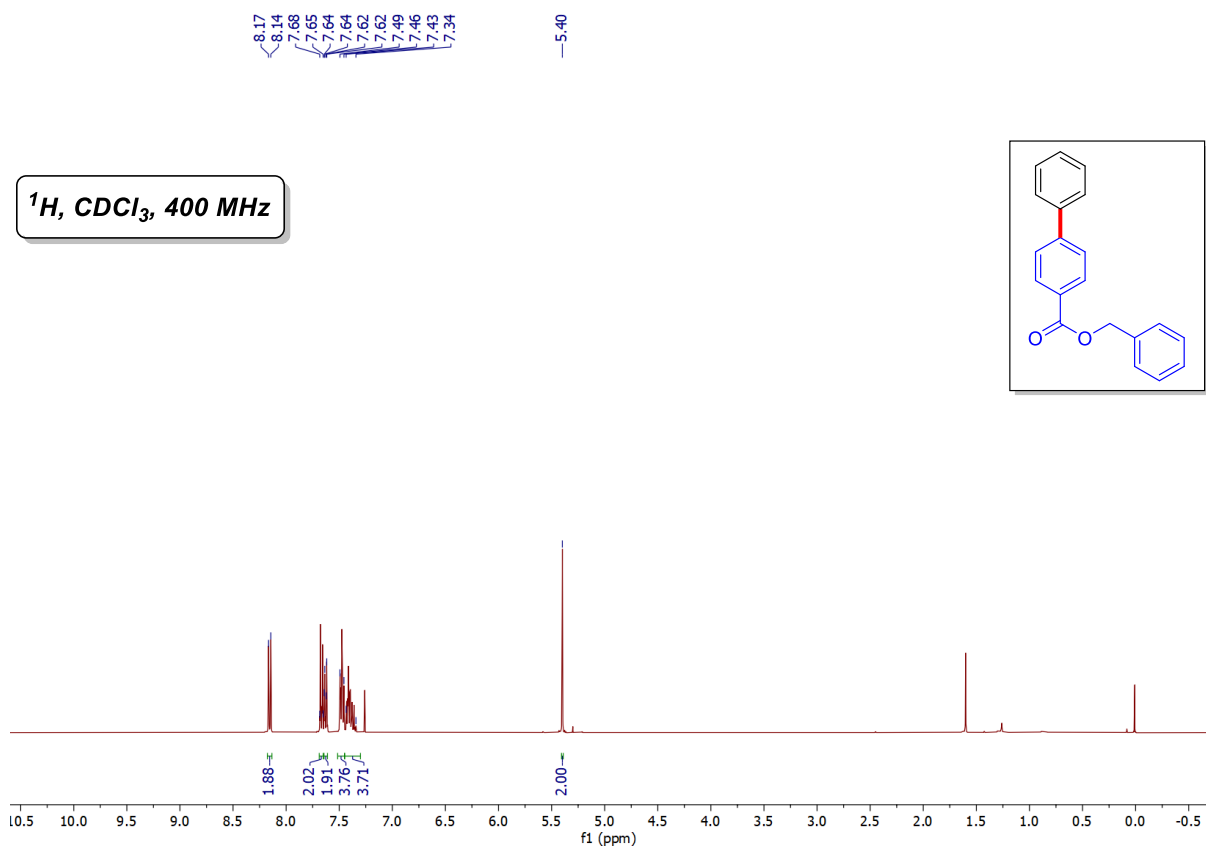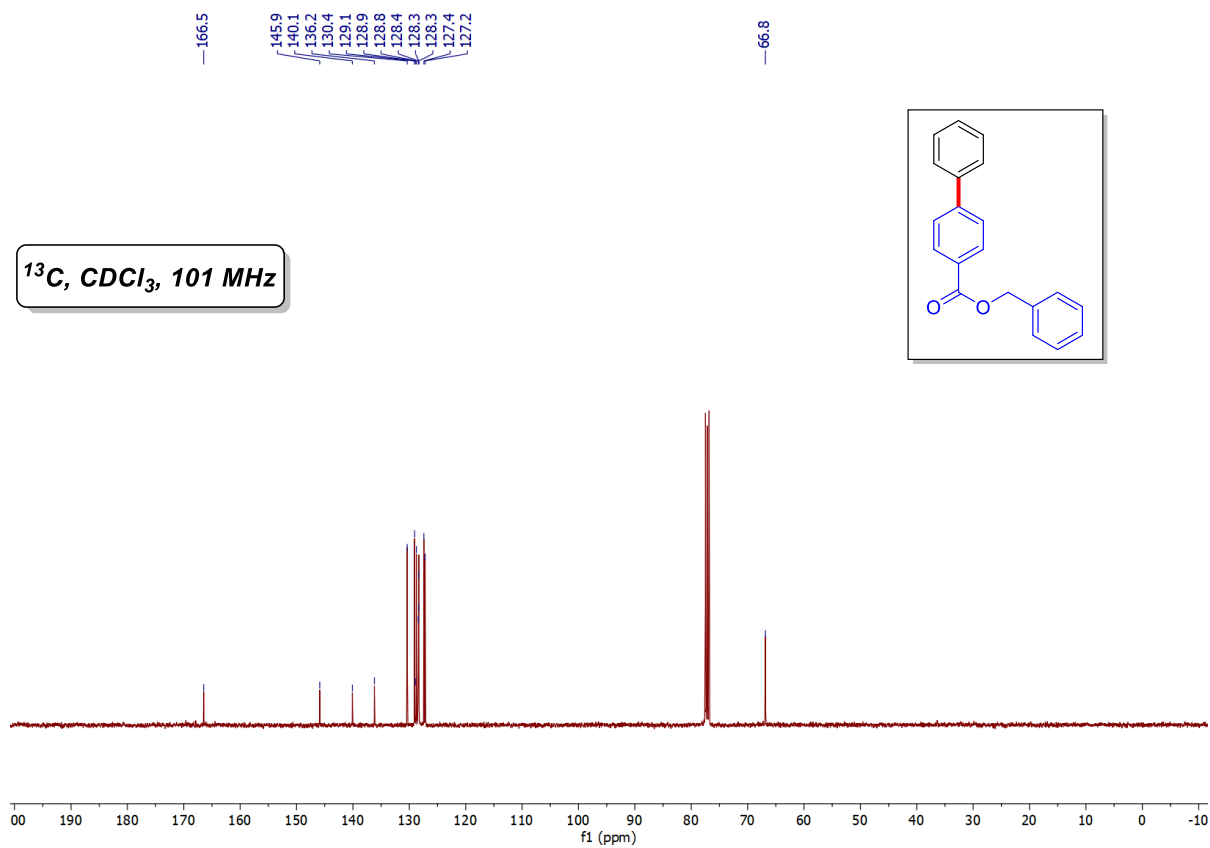

## [1,1'-biphenyl]-4-carbonitrile (3ca)

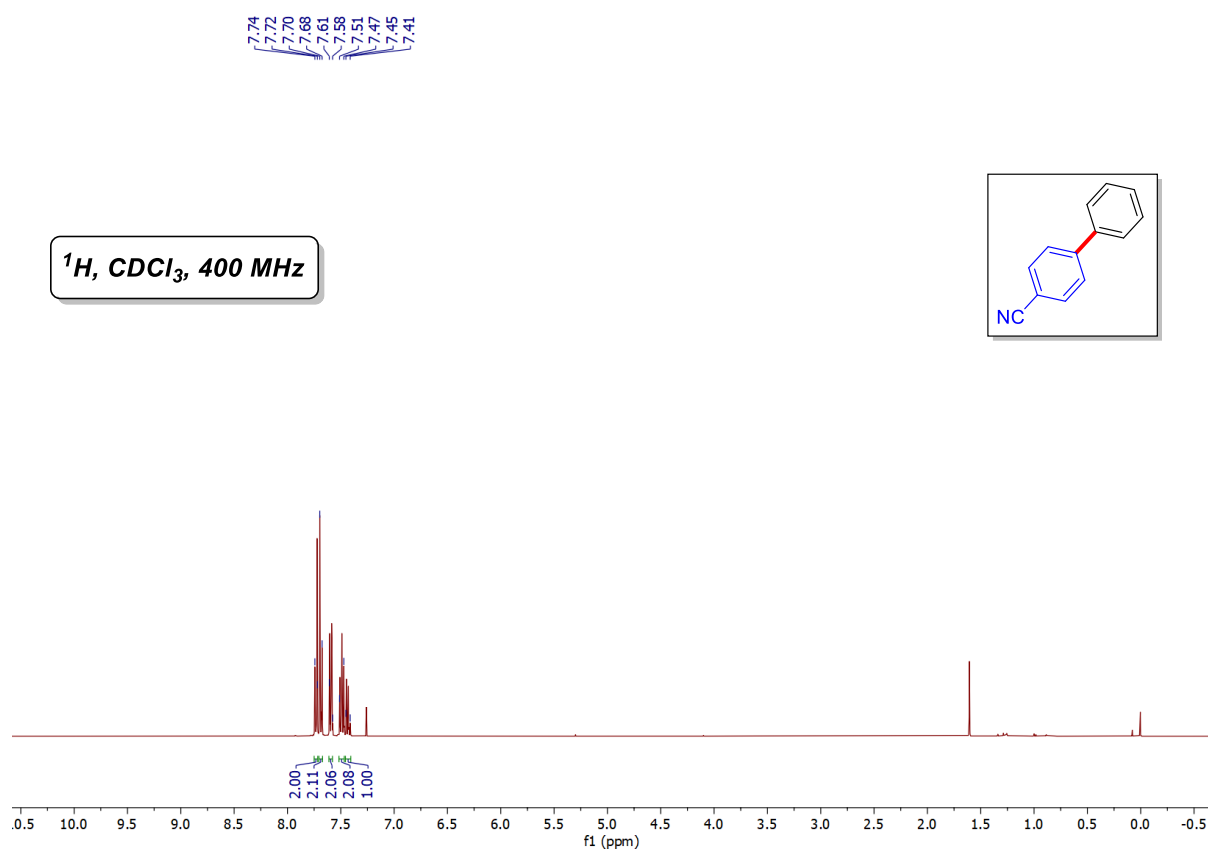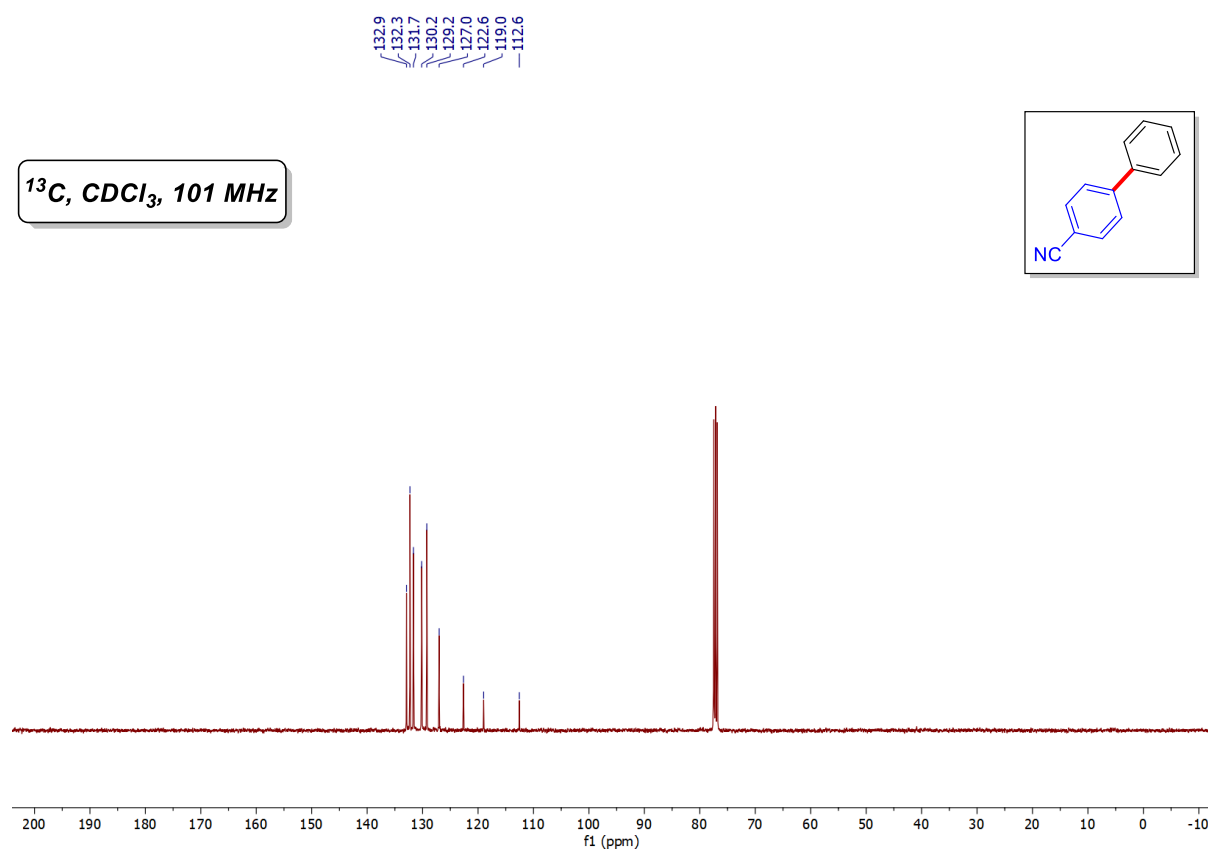

## 4-(trifluoromethyl)-1,1'-biphenyl (3da)

7.70  
7.62  
7.59  
7.56  
7.46  
7.43  
7.39

$^1\text{H}$ ,  $\text{CDCl}_3$ , 400 MHz

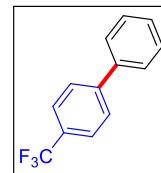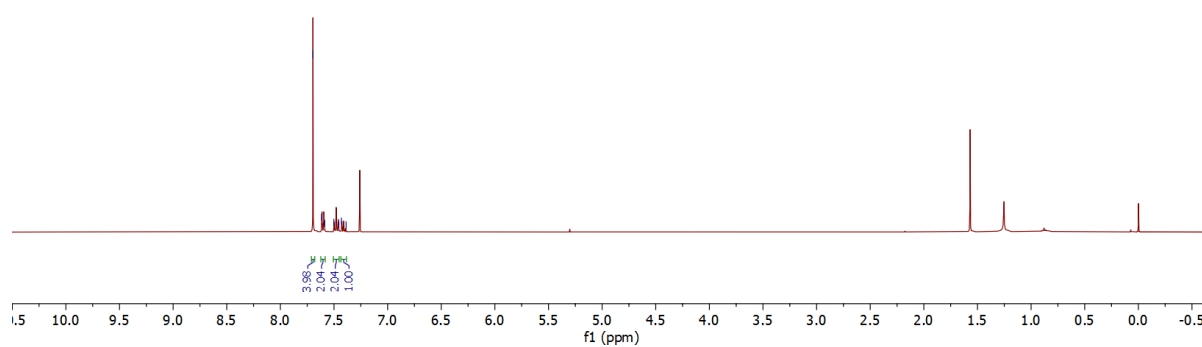

143.4  
130.9  
130.6  
130.3  
129.9  
129.3  
128.3  
127.8  
127.6  
127.4  
127.3  
126.2  
125.1  
125.1  
125.0  
125.6  
122.9  
120.2

$^{13}\text{C}$ ,  $\text{CDCl}_3$ , 101 MHz

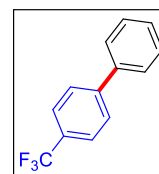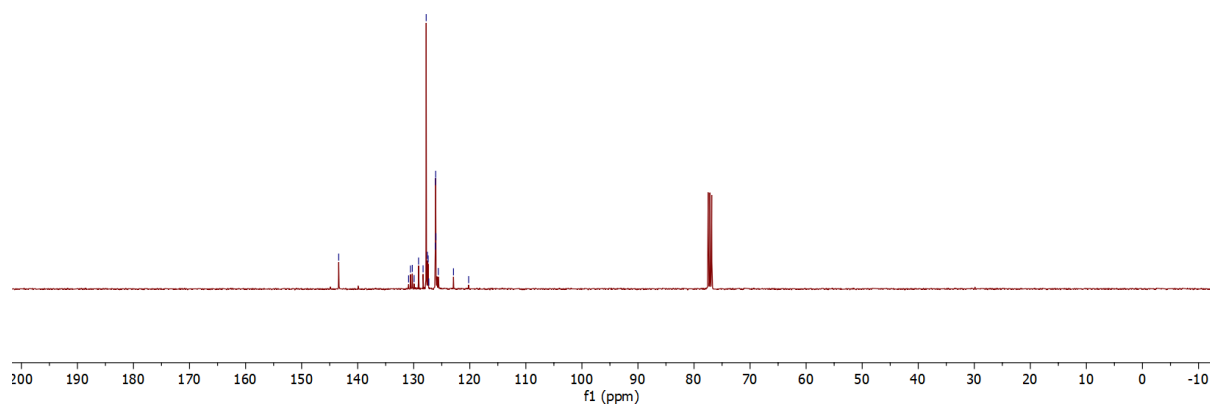

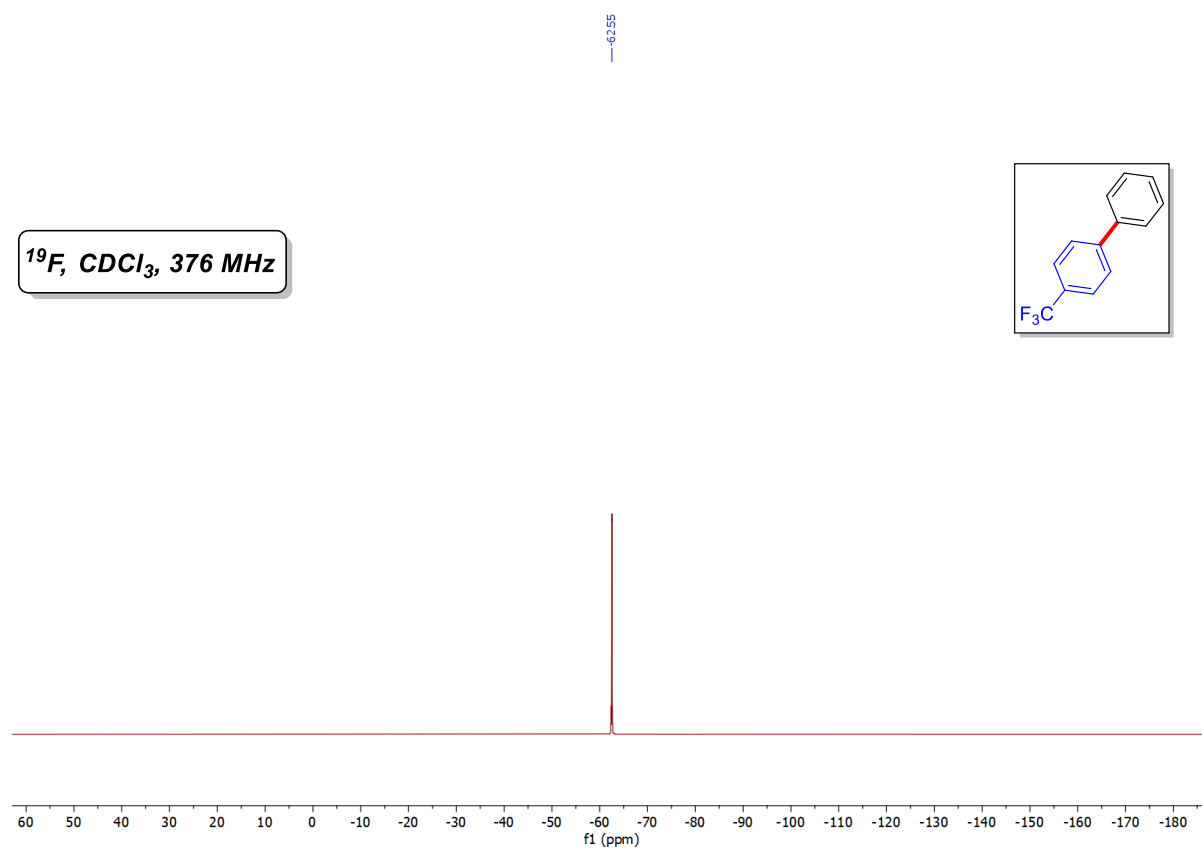

## 4-fluoro-1,1'-biphenyl (3ea)

 $^1\text{H}$ ,  $\text{CDCl}_3$ , 400 MHz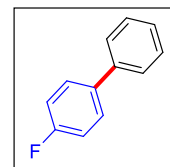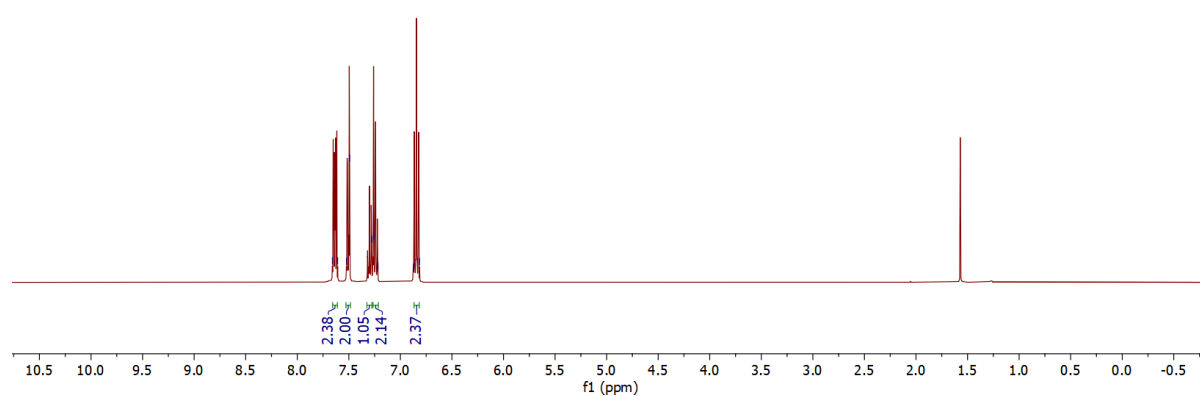 $^{13}\text{C}$ ,  $\text{CDCl}_3$ , 101 MHz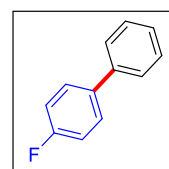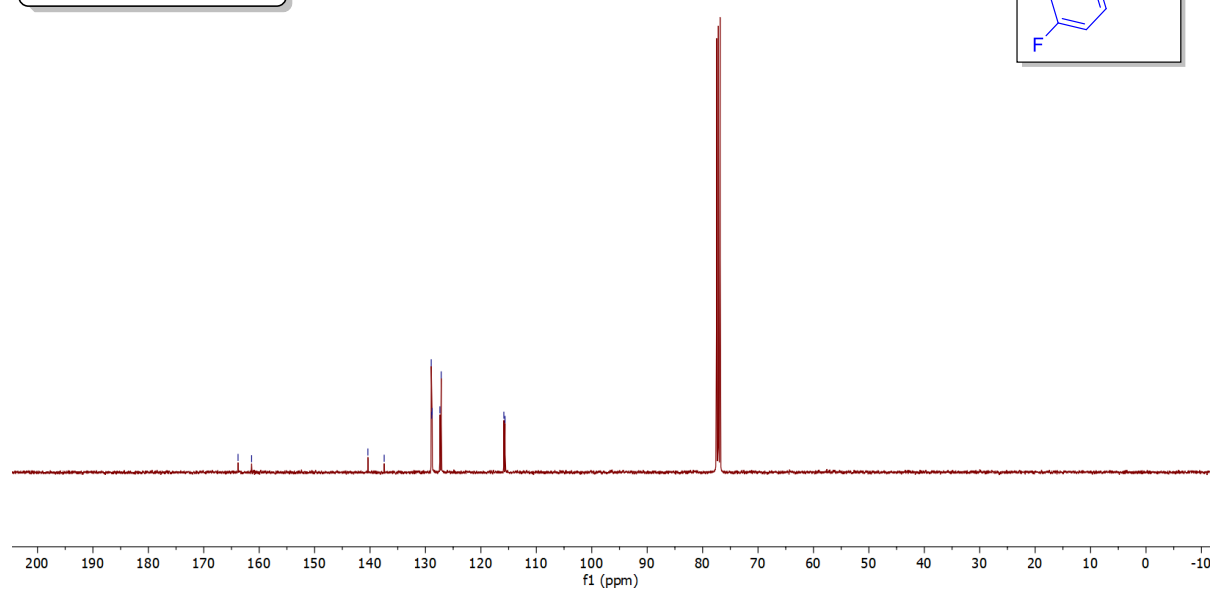

**$^{19}\text{F}$ ,  $\text{CDCl}_3$ , 376 MHz**

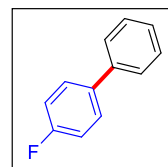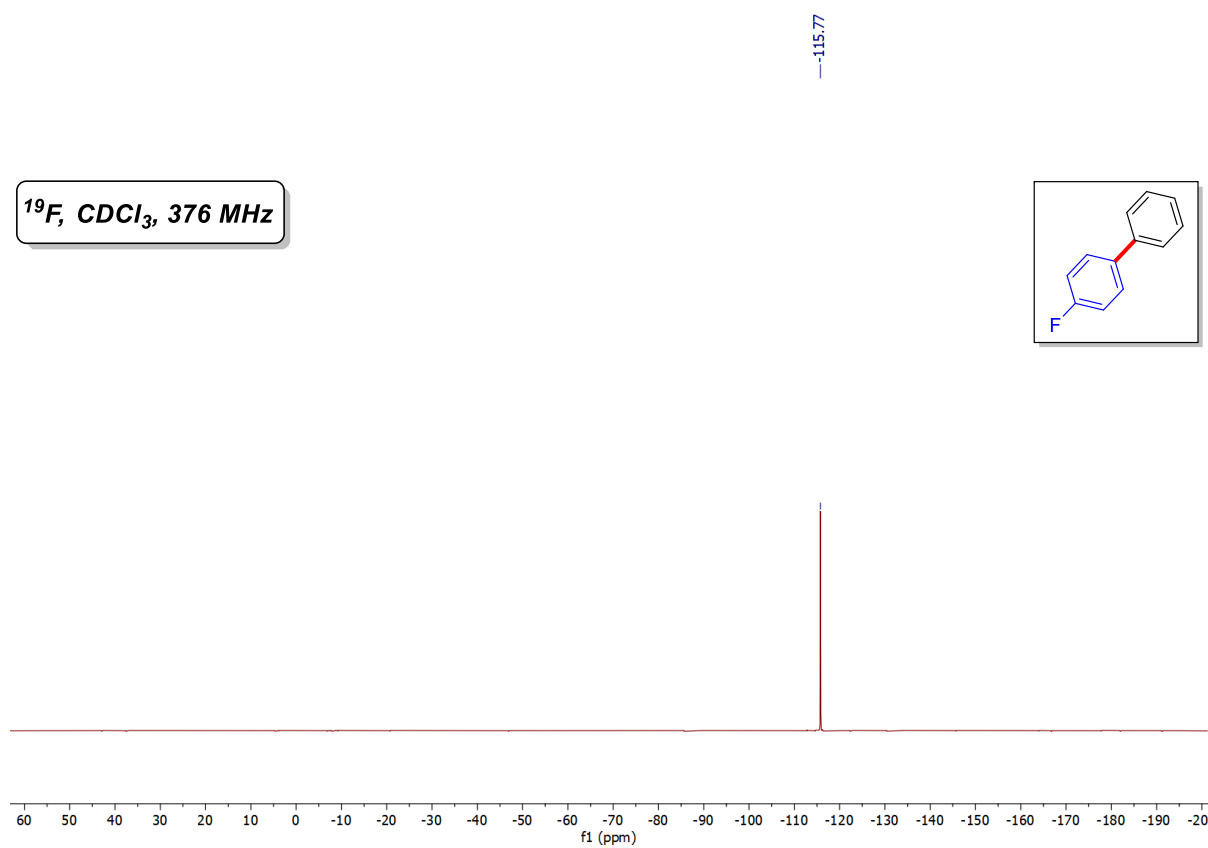

**4-isopropyl-1,1'-biphenyl (3aj)**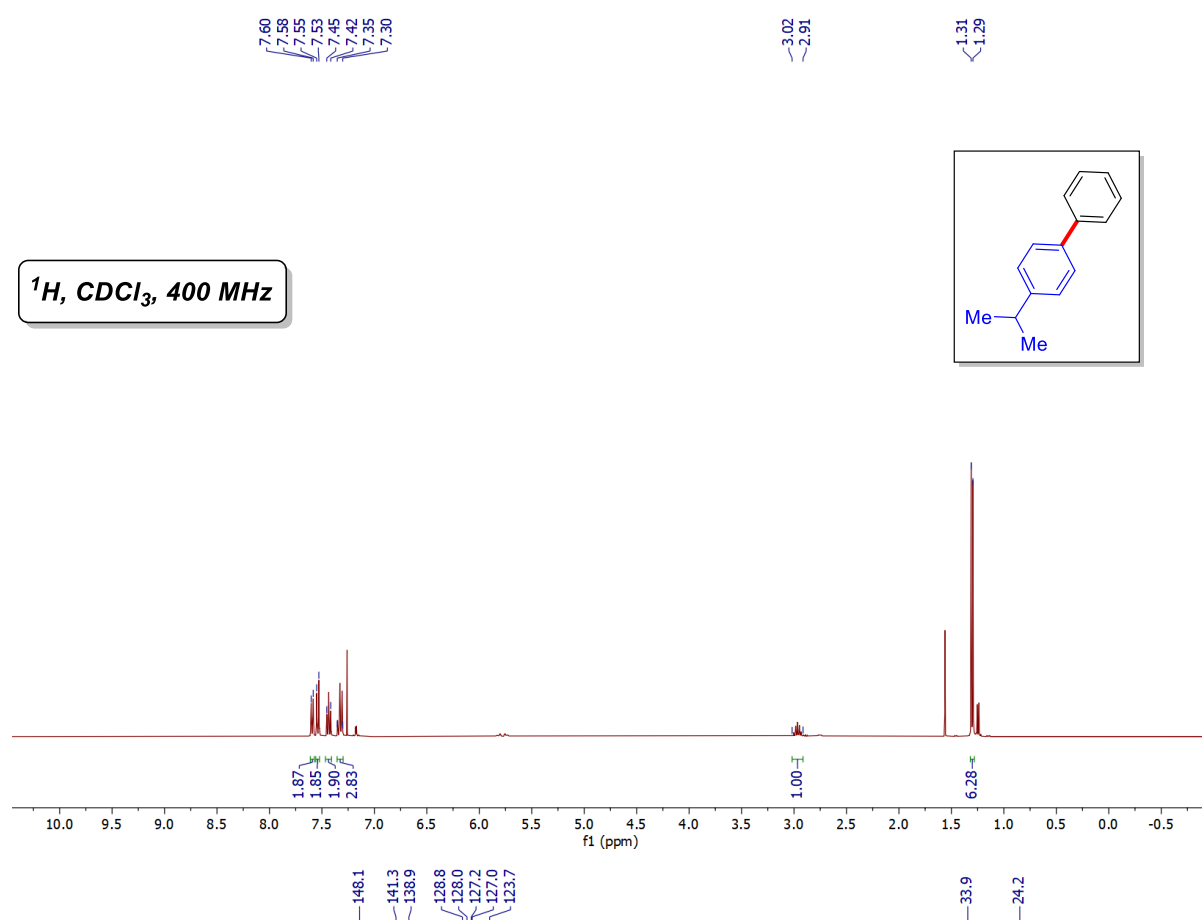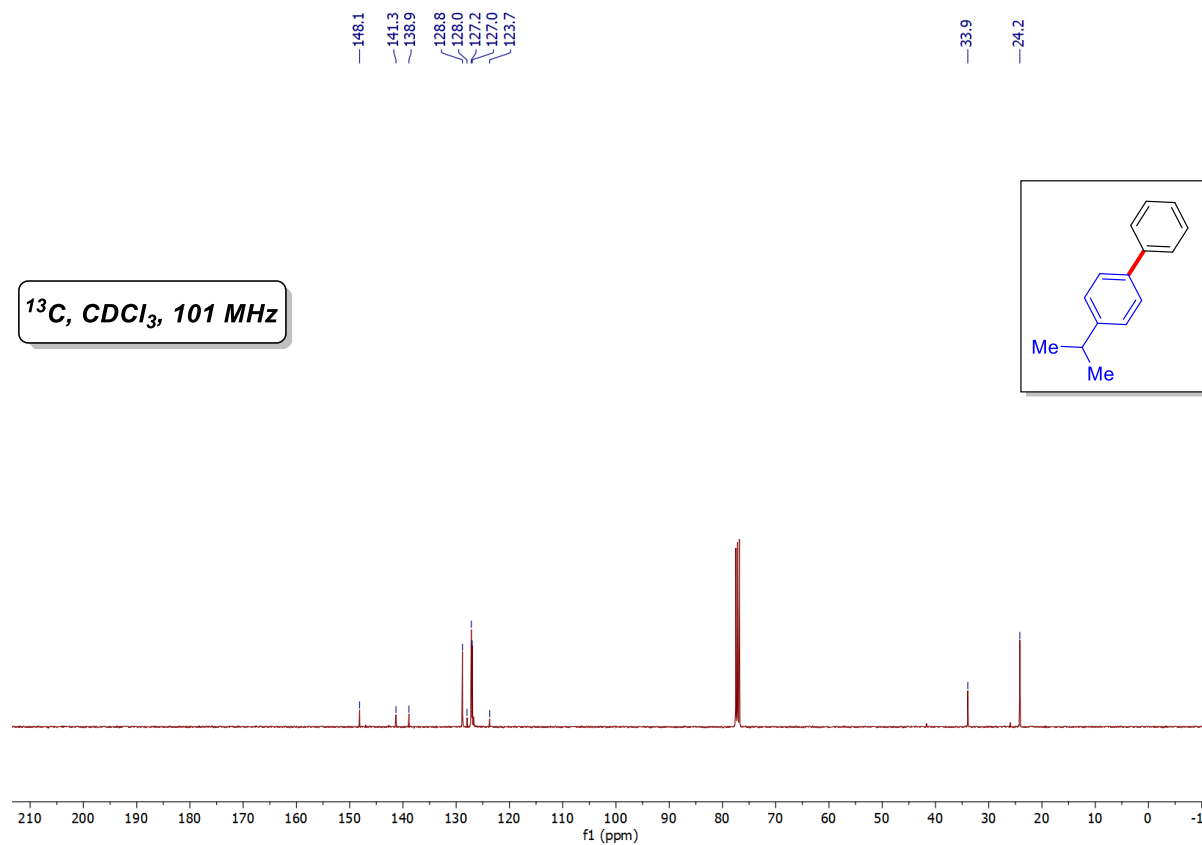**4-(tert-butyl)-1,1'-biphenyl (3ga)**

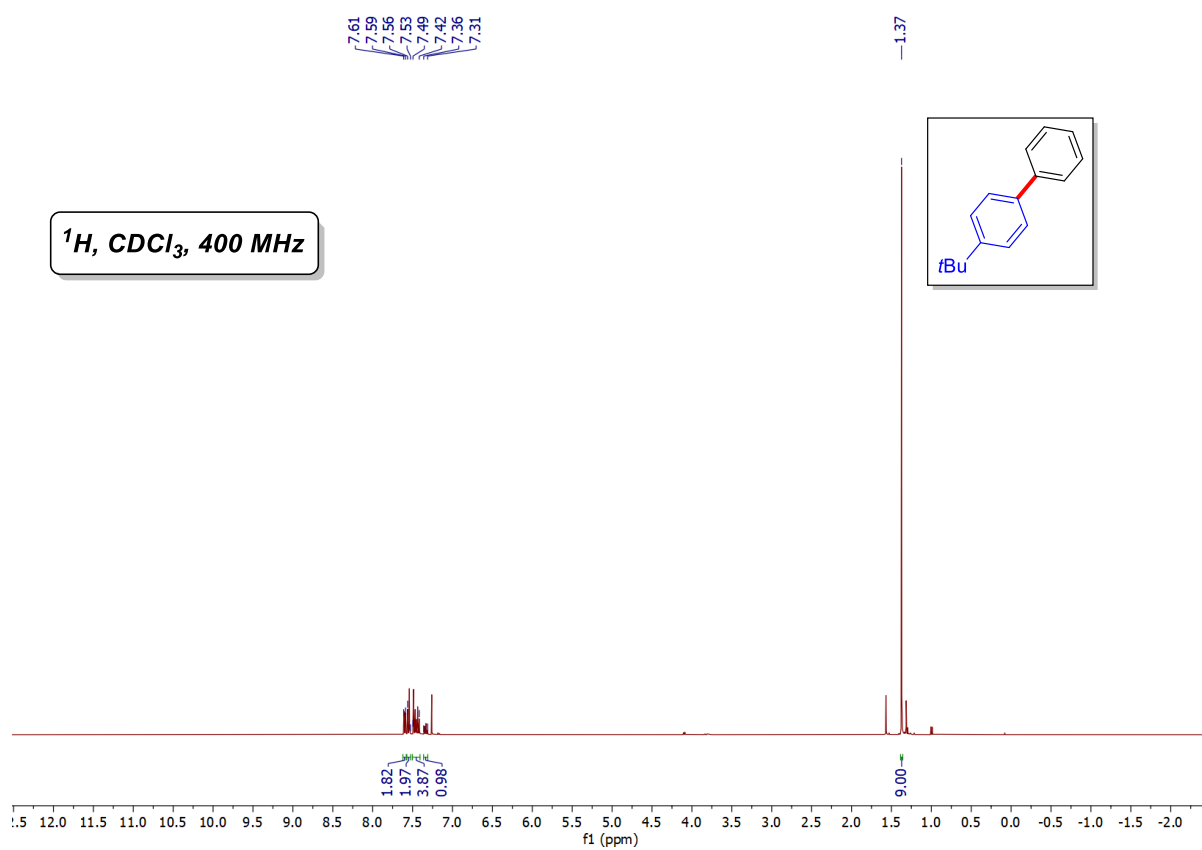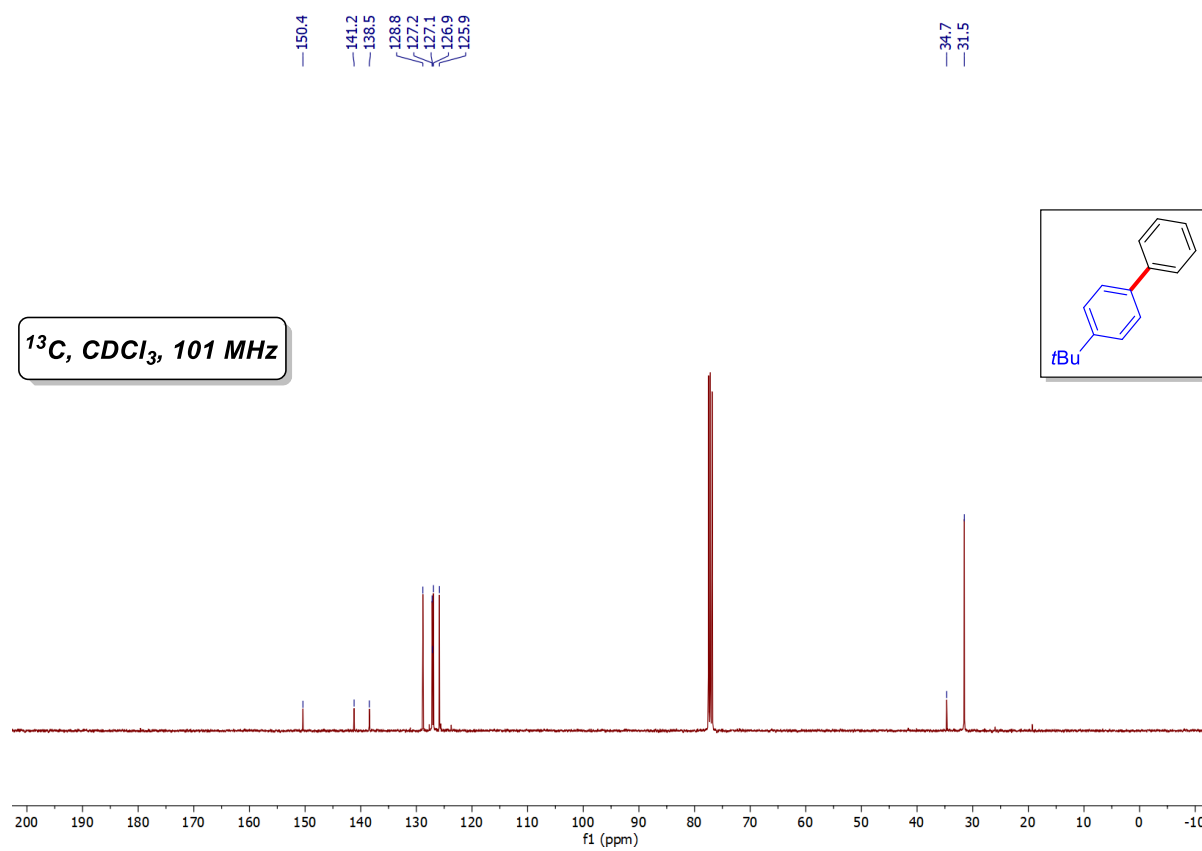



**1,1':4',1''-terphenyl (3ha)**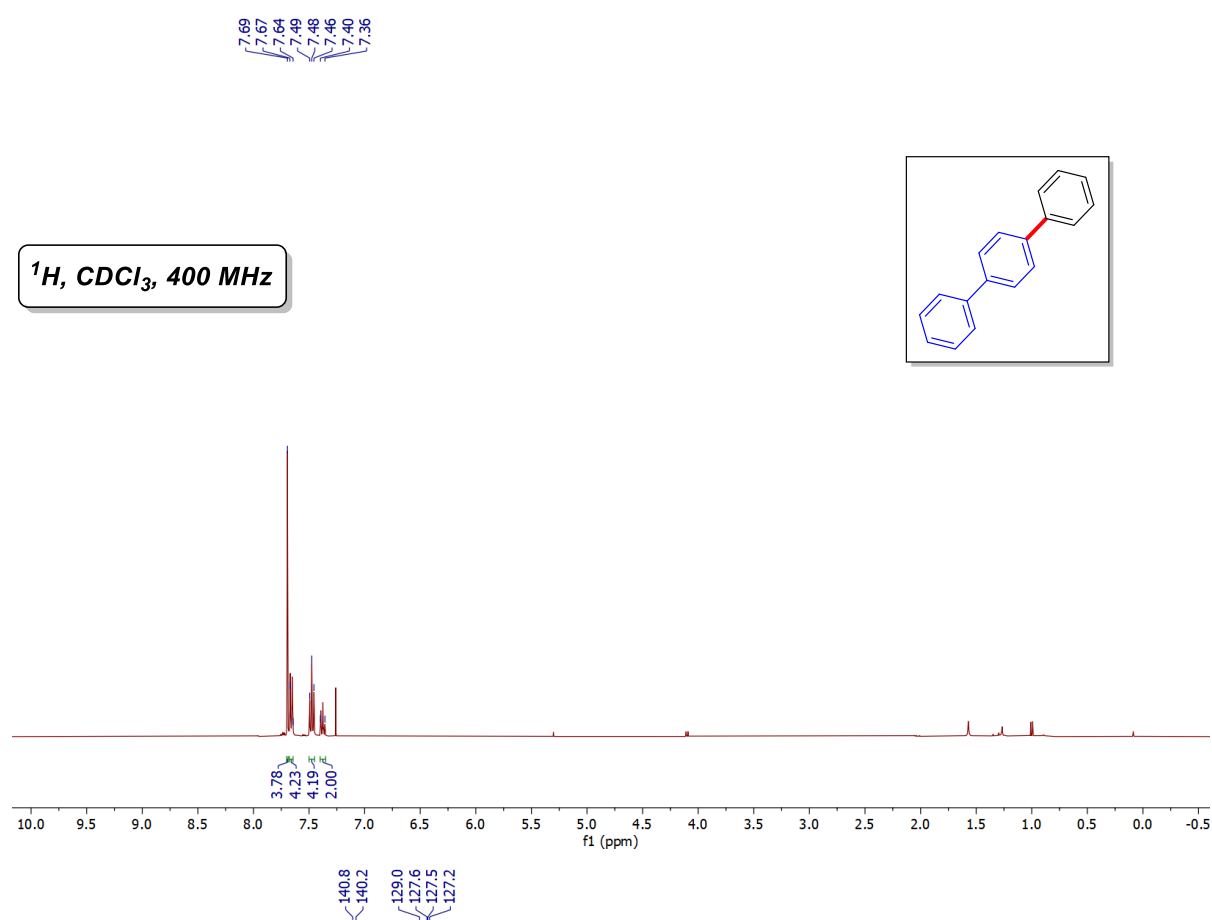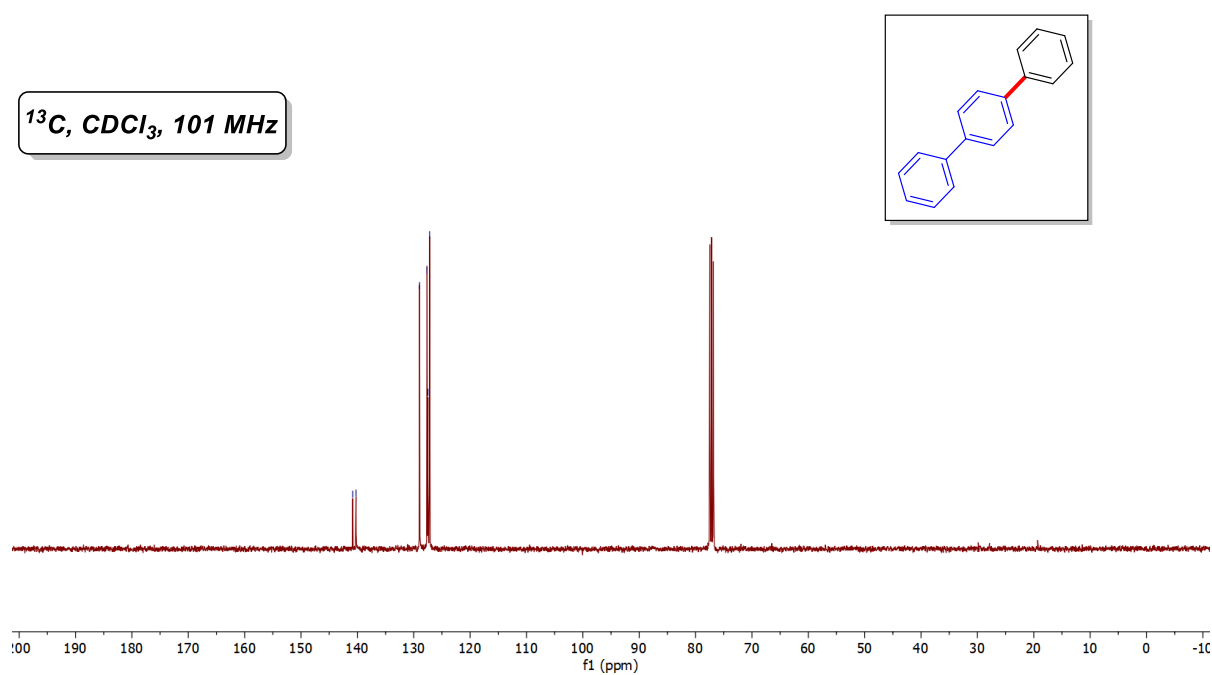

**3-methoxy-1,1'-biphenyl (3ia)**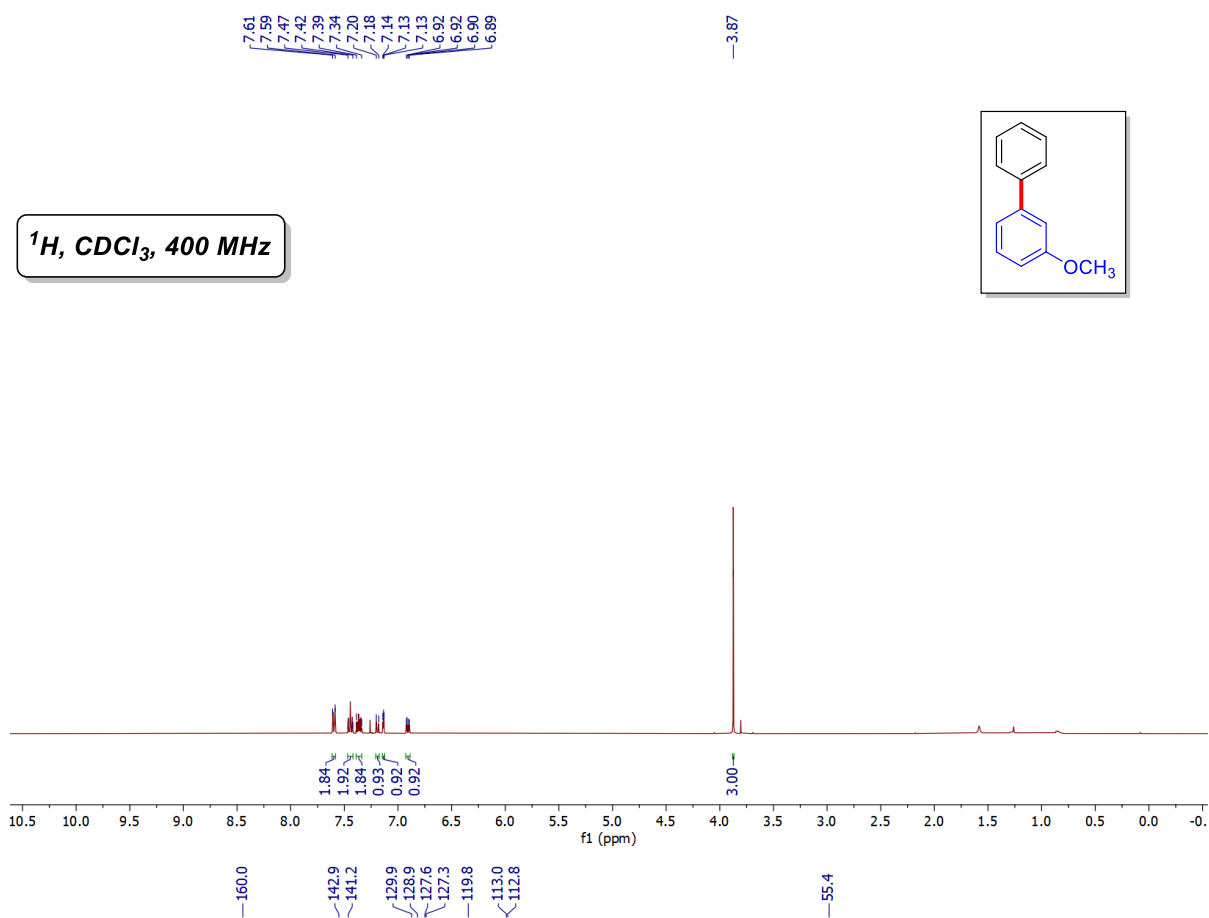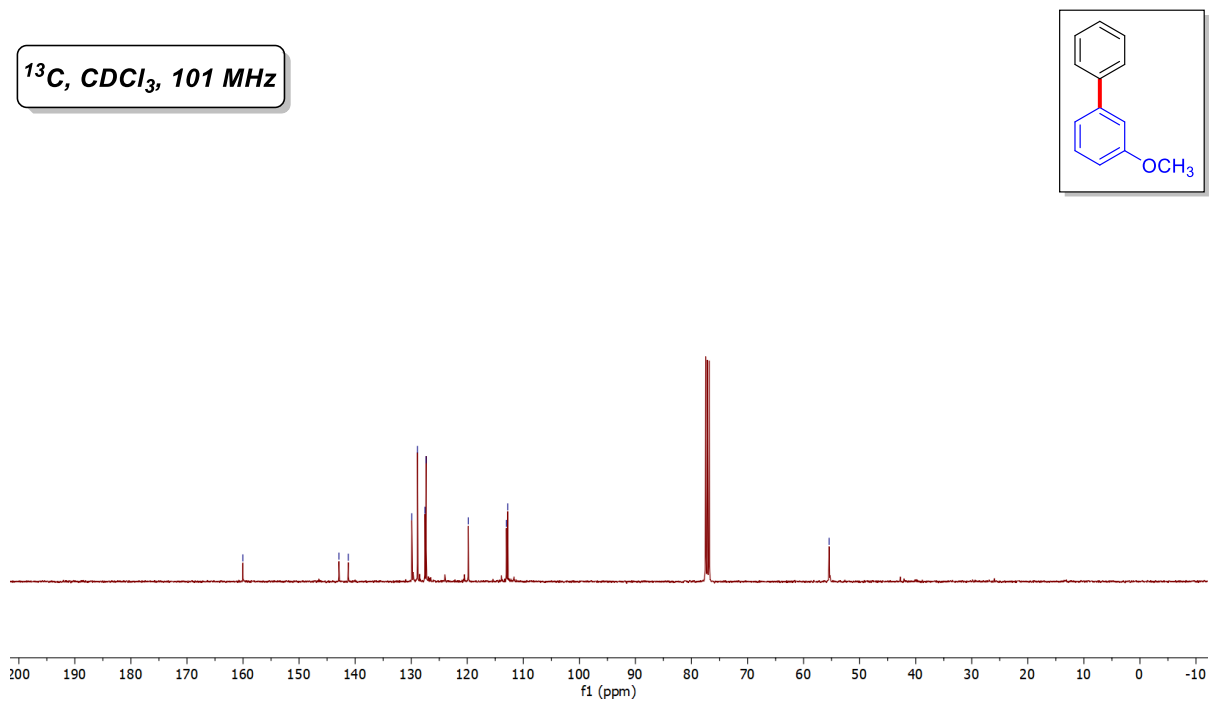

**2-chloro-1,1'-biphenyl (3ja)**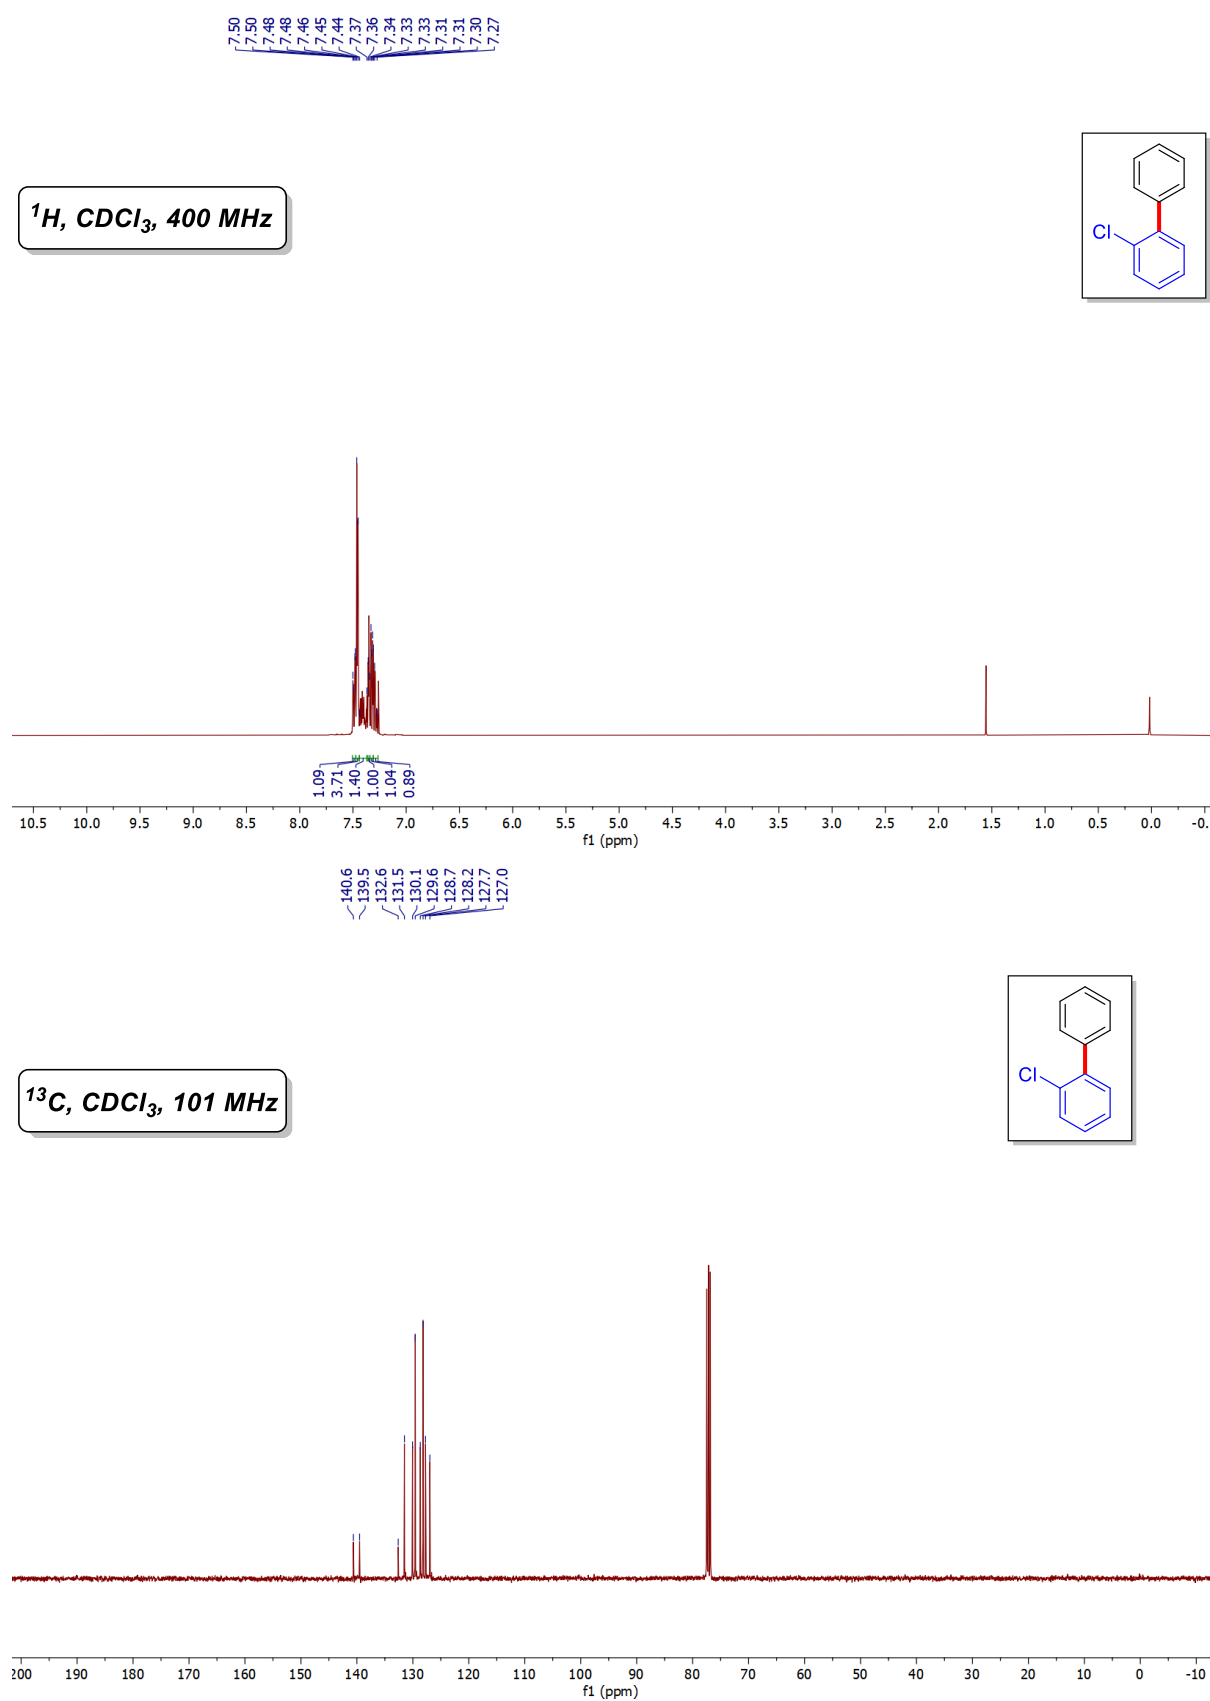

**1-phenylnaphthalene (3ka)**

7.92  
7.90  
7.88  
7.86  
7.55  
7.54  
7.52  
7.48  
7.46  
7.42

**$^1\text{H}$ ,  $\text{CDCl}_3$ , 400 MHz**

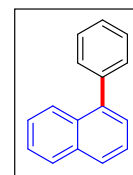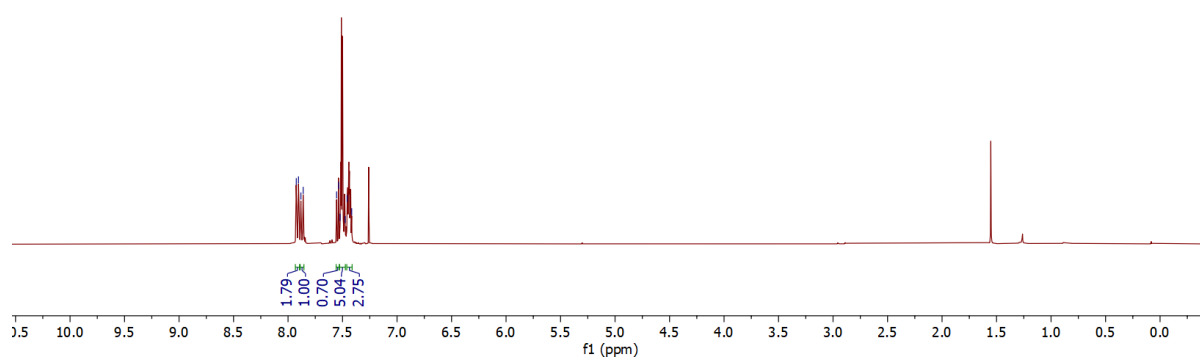

140.9  
140.4  
133.9  
131.7  
130.2  
128.9  
128.4  
128.0  
127.8  
127.4  
127.1  
126.2  
125.9  
125.5

**$^{13}\text{C}$ ,  $\text{CDCl}_3$ , 101 MHz**

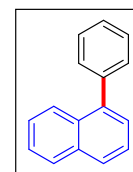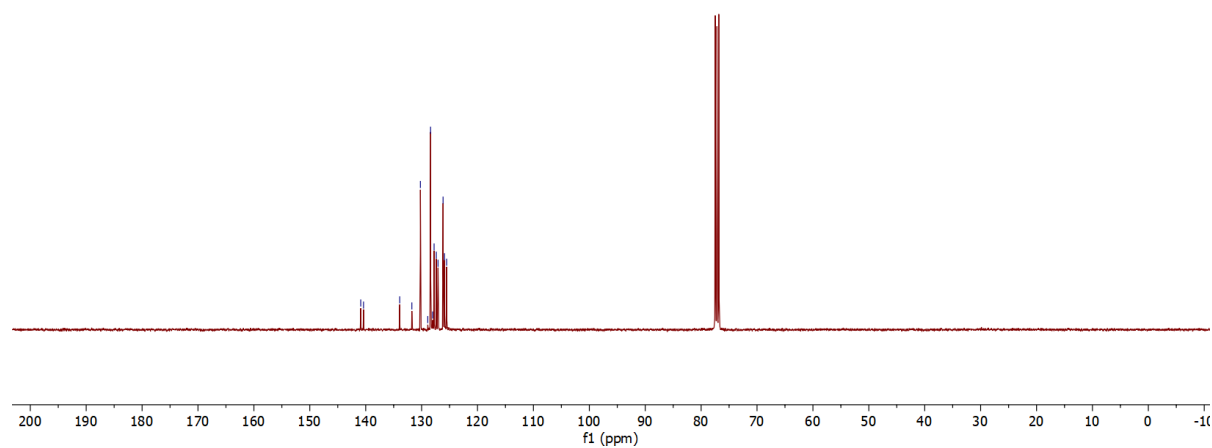

## 4-phenylpyridine (3la)

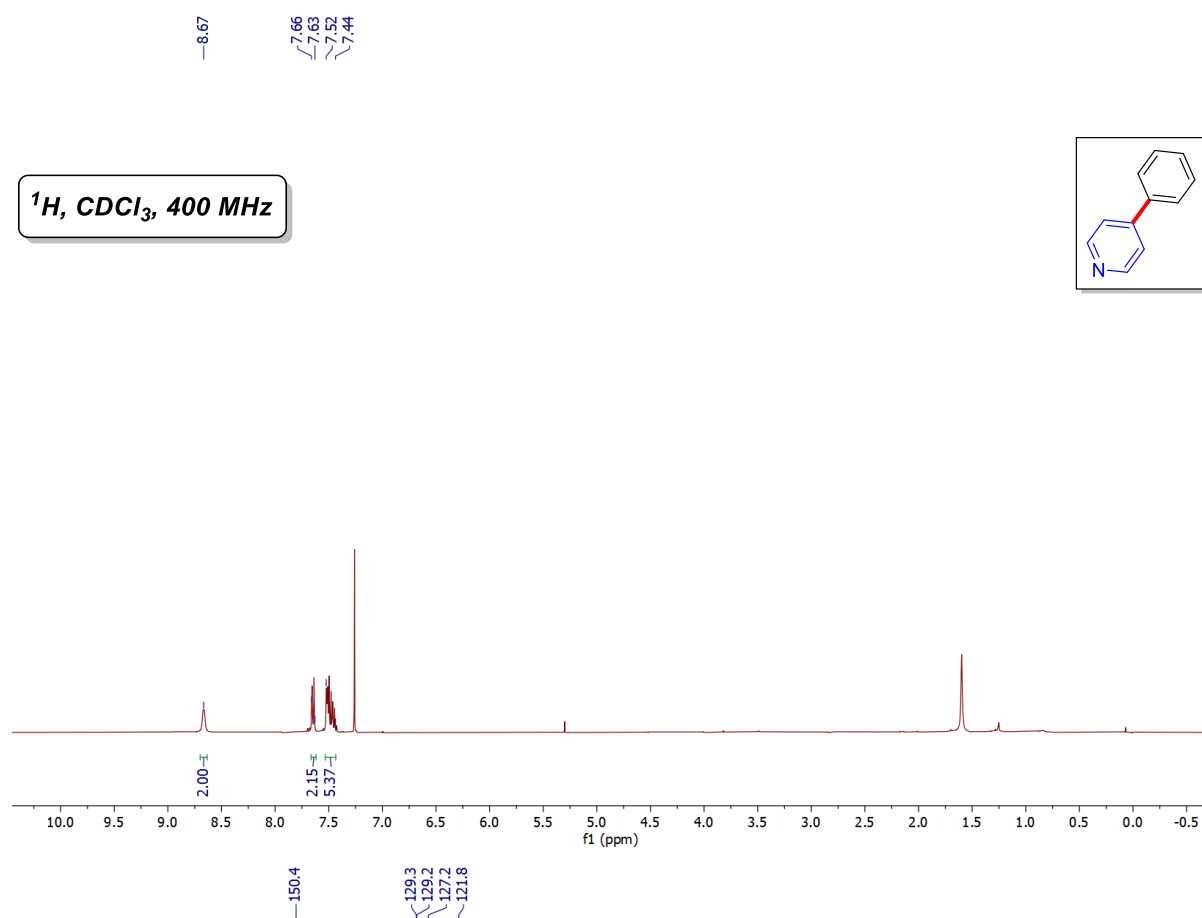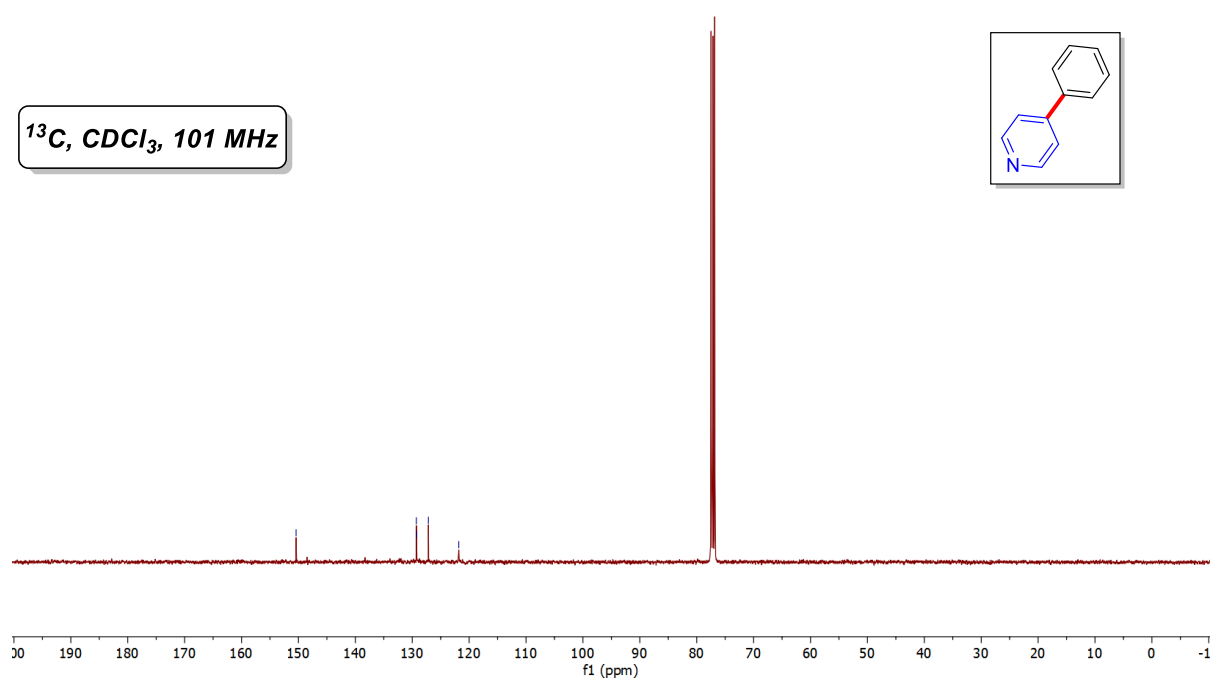

**2-methoxy-4-phenylpyridine (3ma)**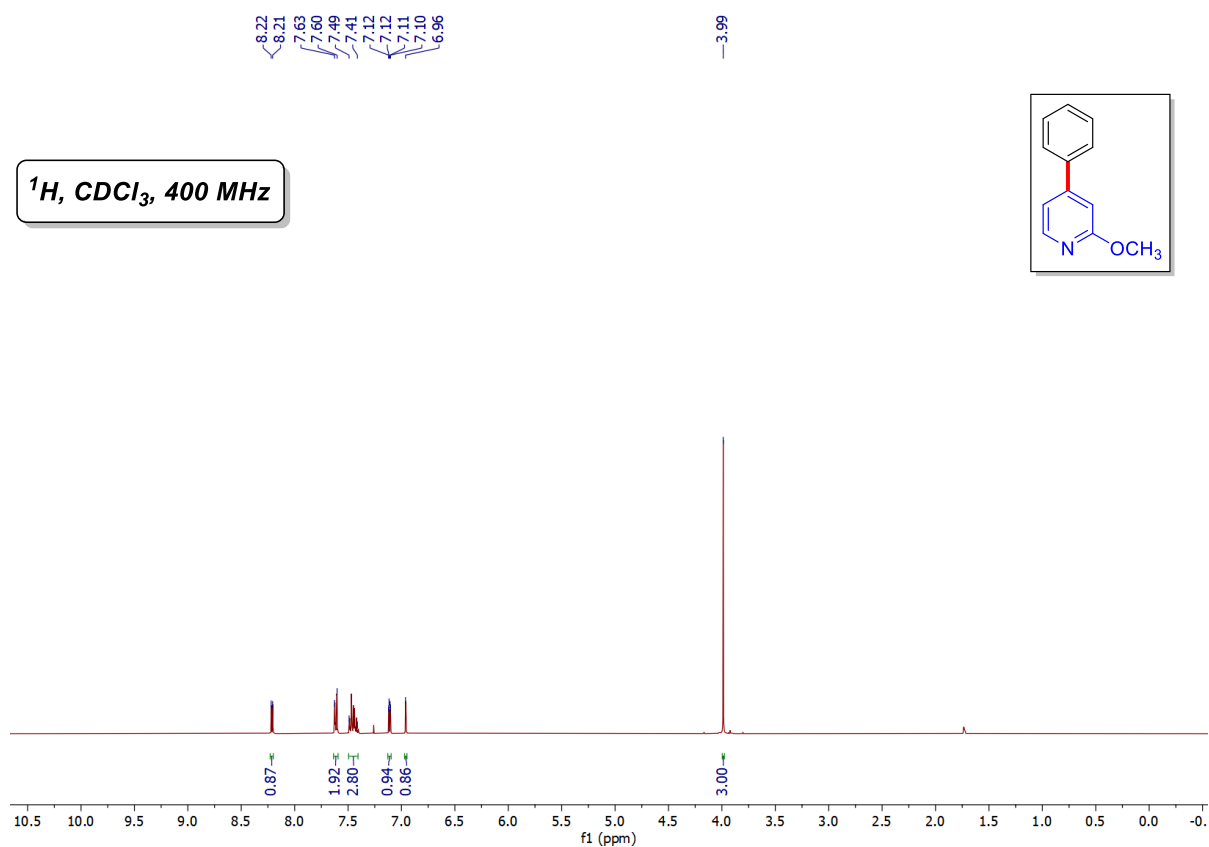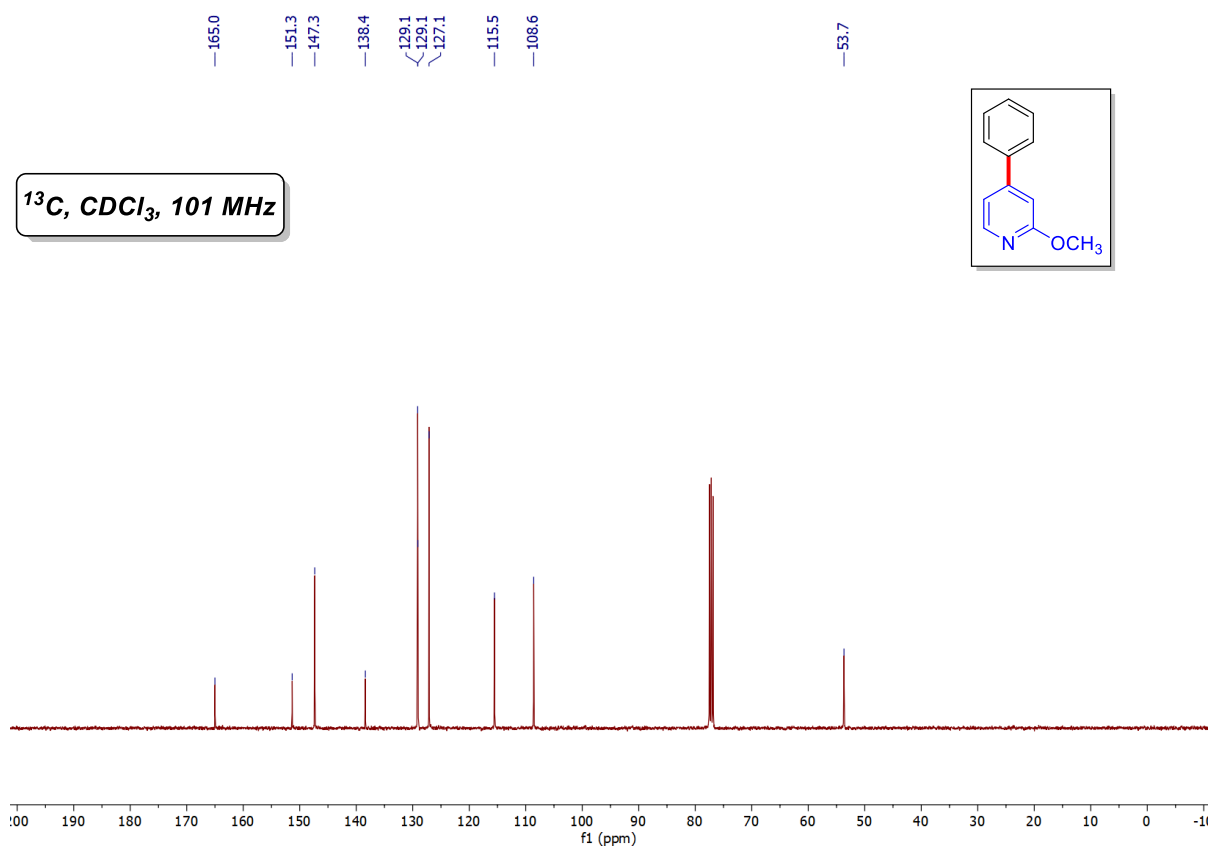

**3-fluoro-4-phenylpyridine (3na)**

8.54  
8.54  
8.47  
8.46  
7.63  
7.60  
7.52  
7.46  
7.42  
7.39

**$^1\text{H}$ ,  $\text{CDCl}_3$ , 400 MHz**

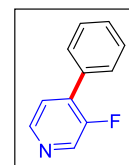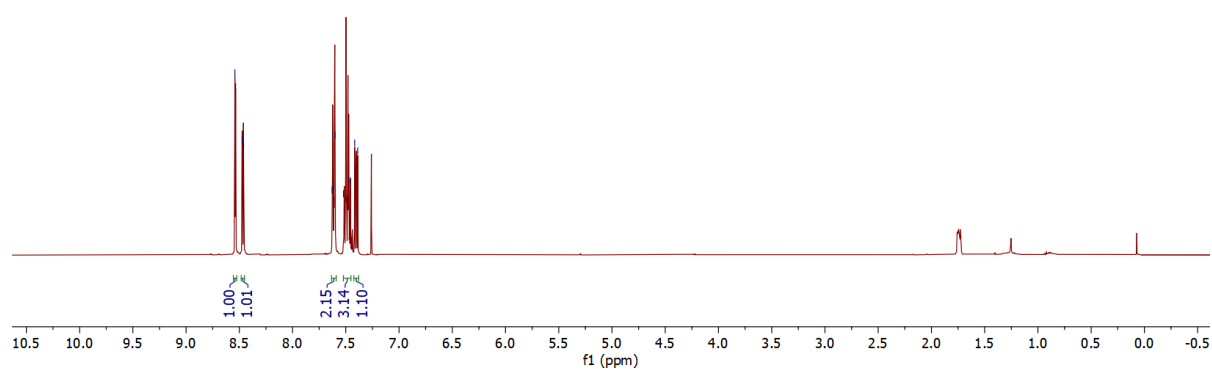

158.1  
155.5  
146.2  
146.1  
139.3  
139.0  
136.2  
136.1  
133.1  
129.4  
129.0  
124.4

**$^{13}\text{C}$ ,  $\text{CDCl}_3$ , 101 MHz**

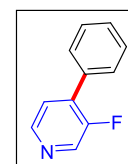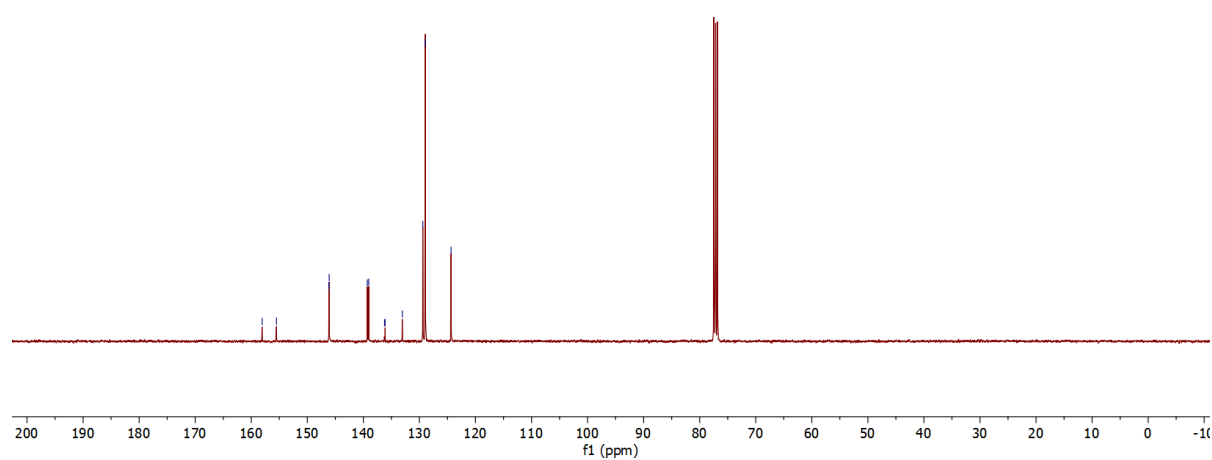

**$^{19}\text{F}$ ,  $\text{CDCl}_3$ , 376 MHz**

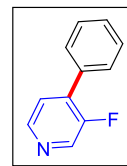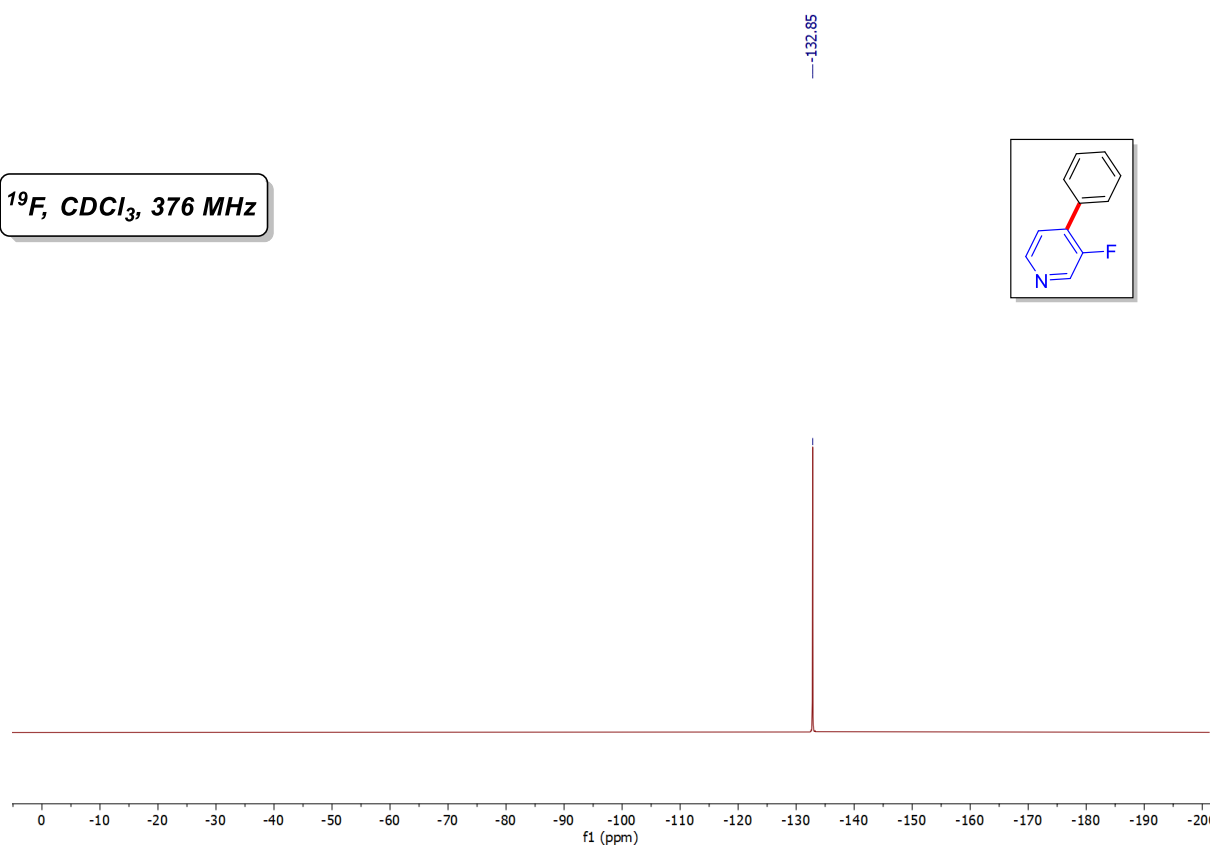



**2-chloro-4-phenylpyridine (3oa)**

8.43  
8.42  
7.62  
7.59  
7.54  
7.52  
7.46  
7.44  
7.43  
7.42

**<sup>1</sup>H, CDCl<sub>3</sub>, 400 MHz**

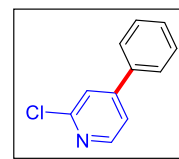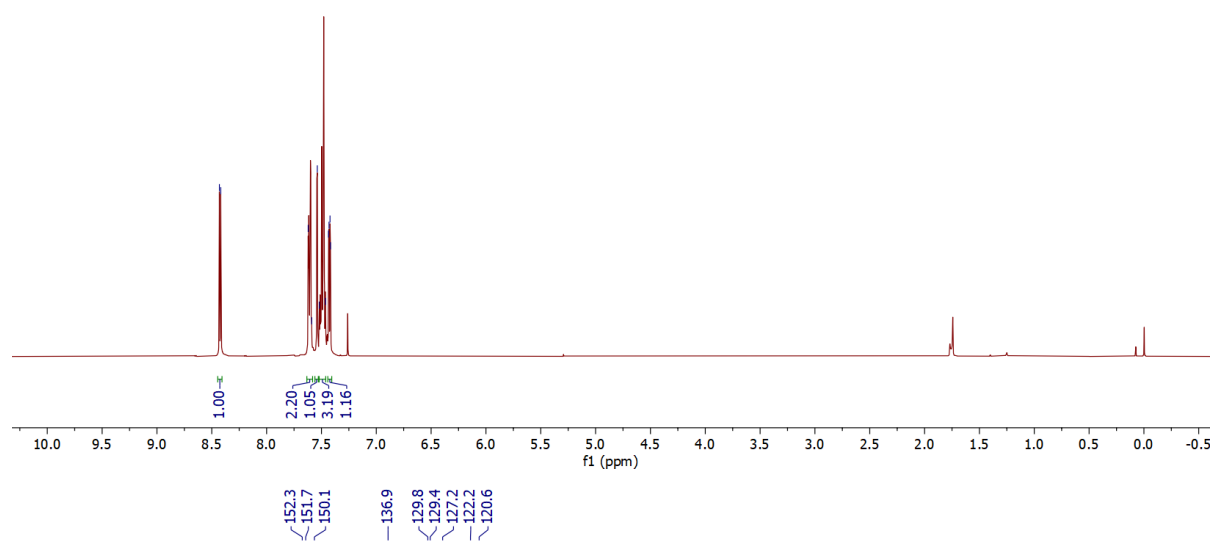

**<sup>13</sup>C, CDCl<sub>3</sub>, 101 MHz**

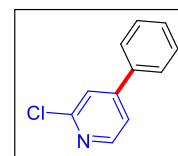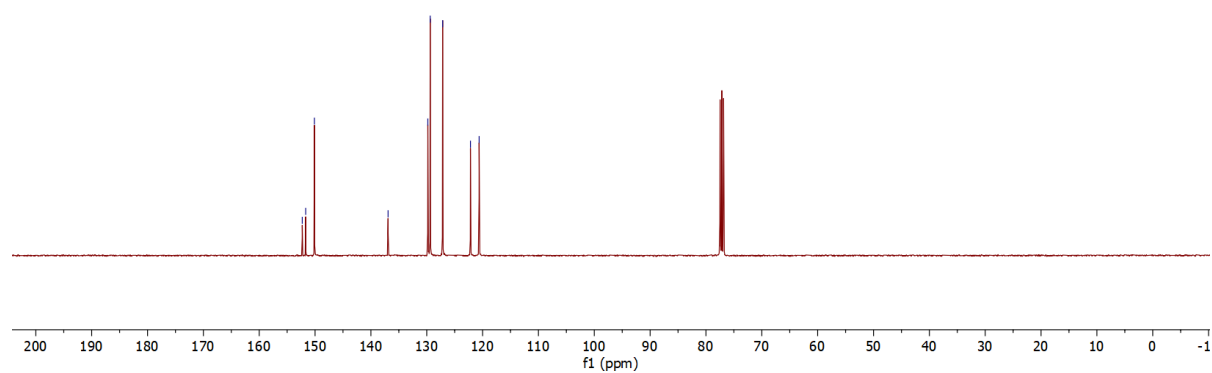

**3-phenylpyridine (3pa)**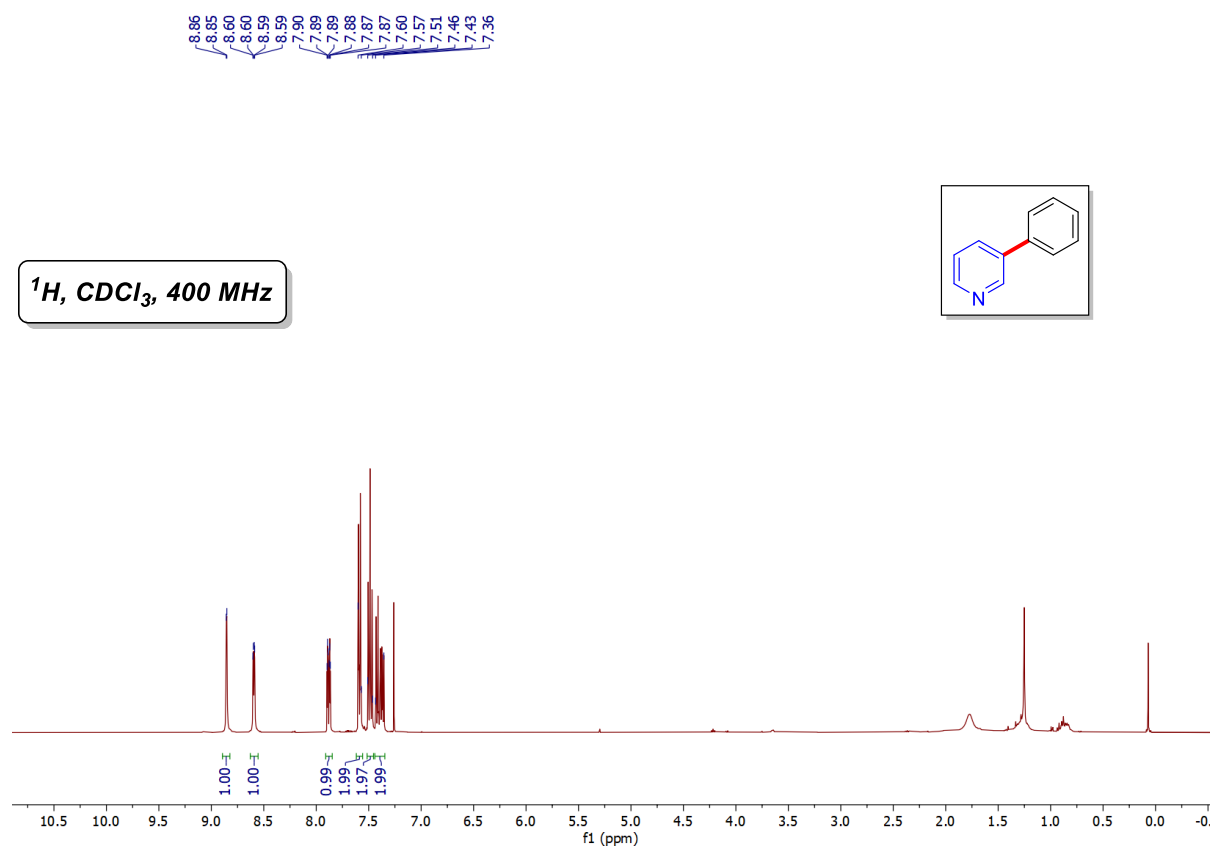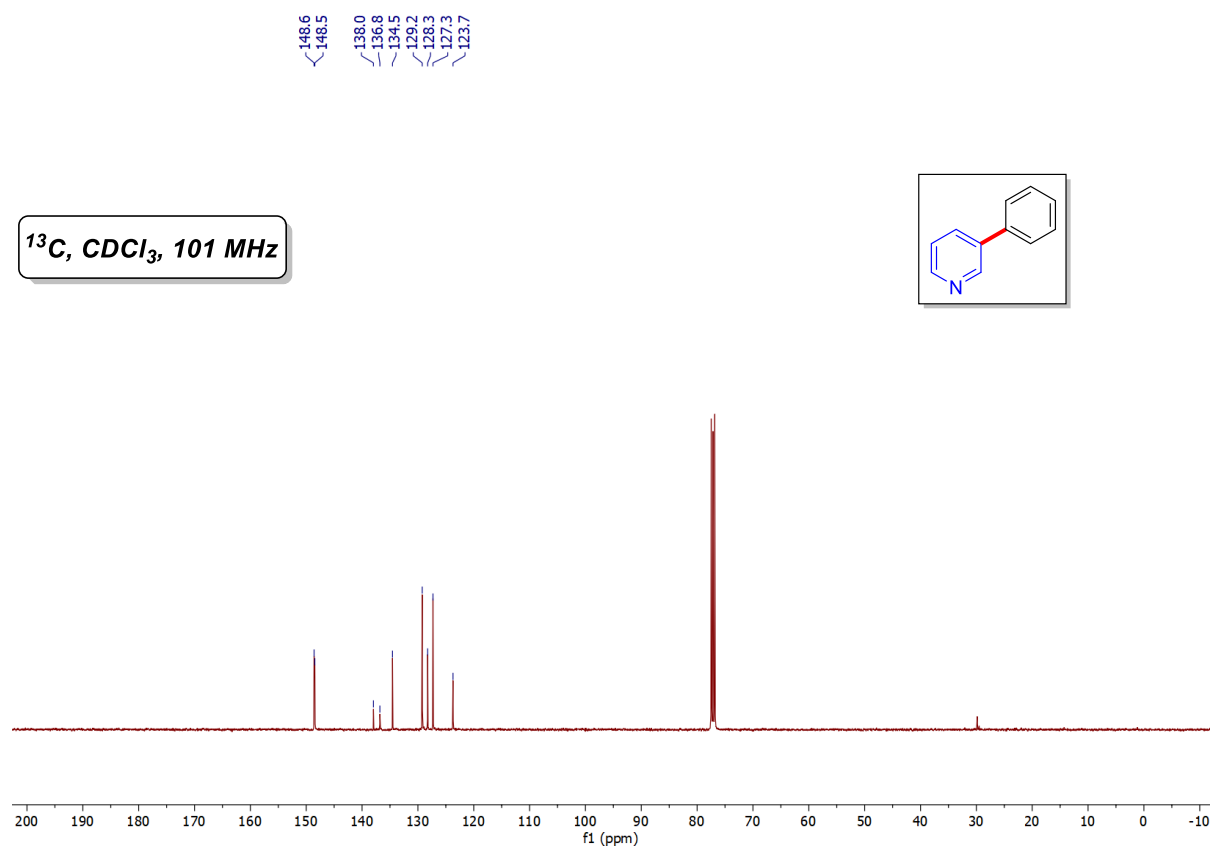

## 2-phenylthiophene (3qa)

7.65  
7.62  
7.42  
7.37  
7.34  
7.28  
7.11  
7.09

$^1\text{H}$ ,  $\text{CDCl}_3$ , 400 MHz

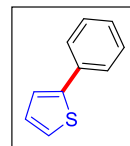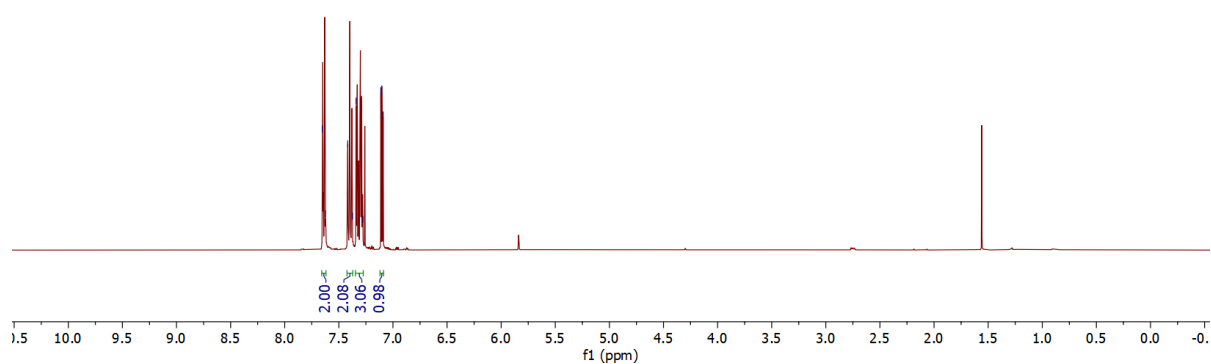

144.5  
134.5  
129.0  
128.1  
127.6  
126.1  
124.9  
123.2

$^{13}\text{C}$ ,  $\text{CDCl}_3$ , 101 MHz

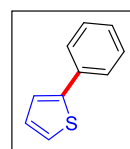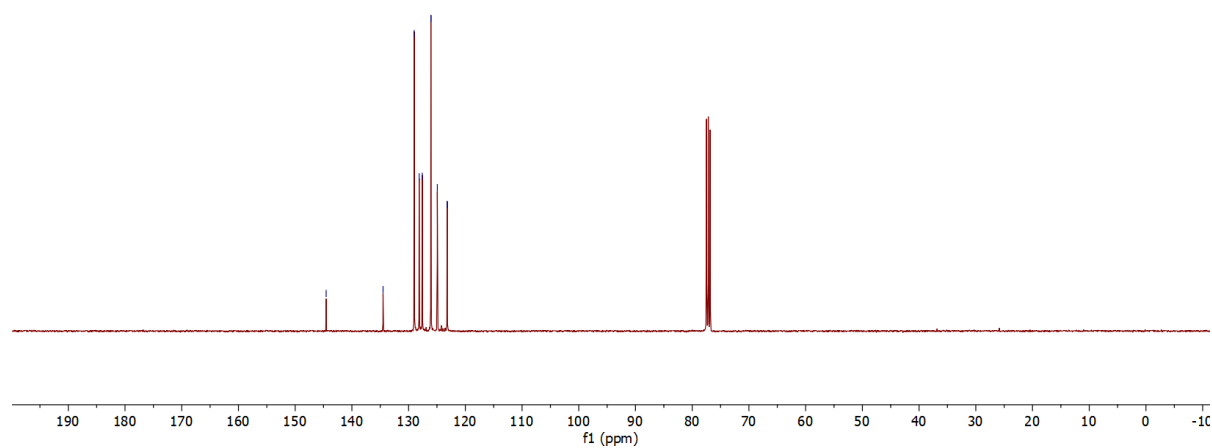

## 5-phenylpyrimidine (3ra)

9.20  
8.95  
7.60  
7.56  
7.54  
7.50  
7.49  
7.44

$^1\text{H}$ ,  $\text{CDCl}_3$ , 400 MHz

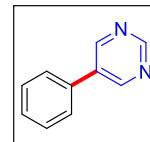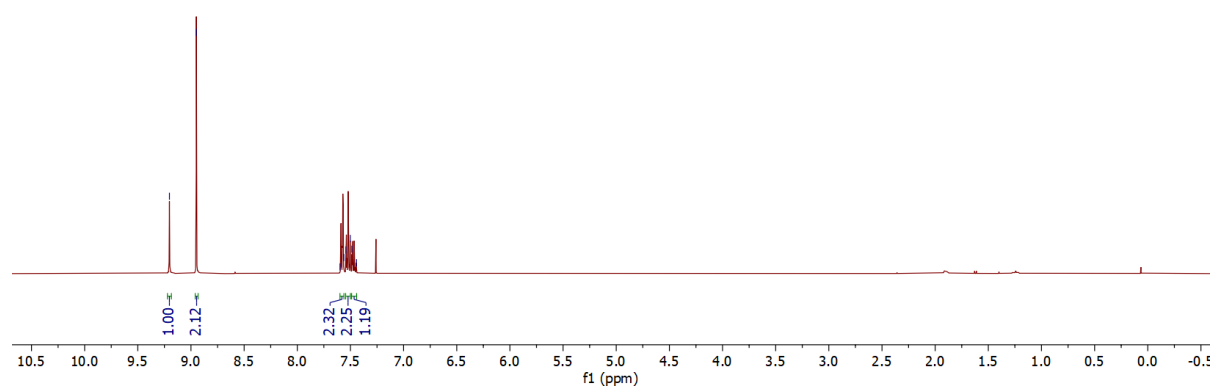

157.6  
155.0  
134.5  
134.4  
129.6  
129.1  
127.1

$^{13}\text{C}$ ,  $\text{CDCl}_3$ , 101 MHz

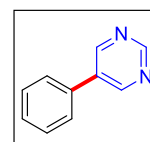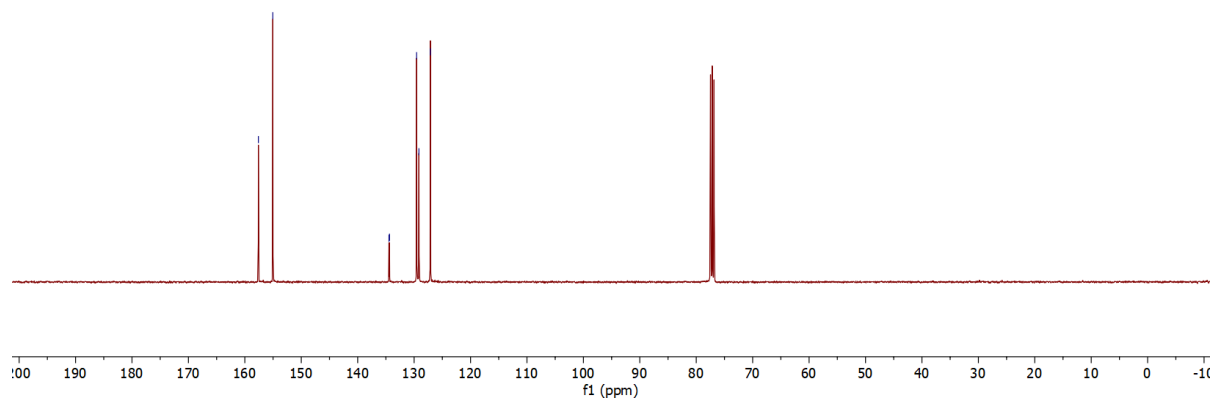

**3-phenylbenzo[b]thiophene (3sa)**

7.96  
7.91  
7.62  
7.59  
7.52  
7.48  
7.44  
7.39

**$^1\text{H}$ ,  $\text{CDCl}_3$ , 400 MHz**

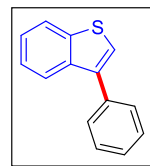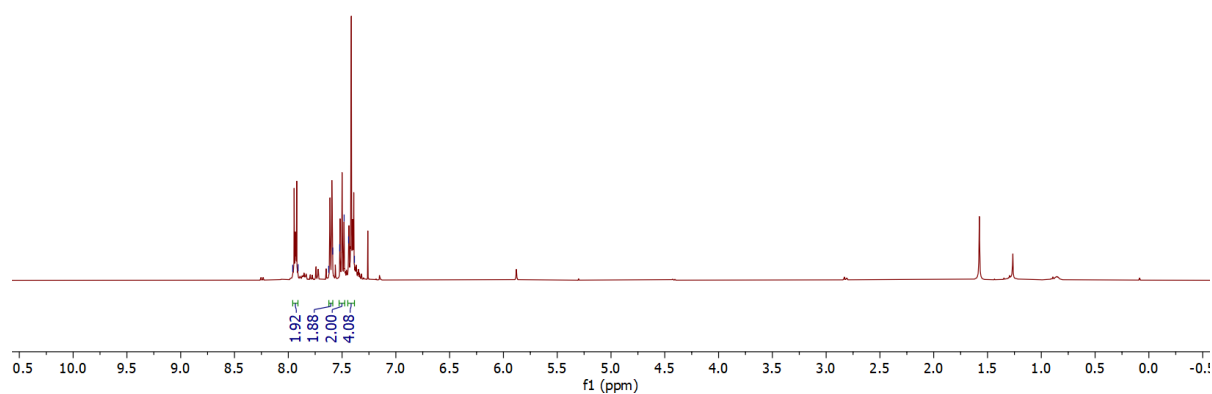

140.8  
138.2  
138.0  
136.1  
129.1  
128.9  
127.7  
126.6  
124.6  
124.5  
123.6  
123.1

**$^{13}\text{C}$ ,  $\text{CDCl}_3$ , 101 MHz**

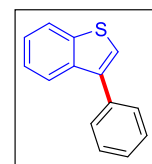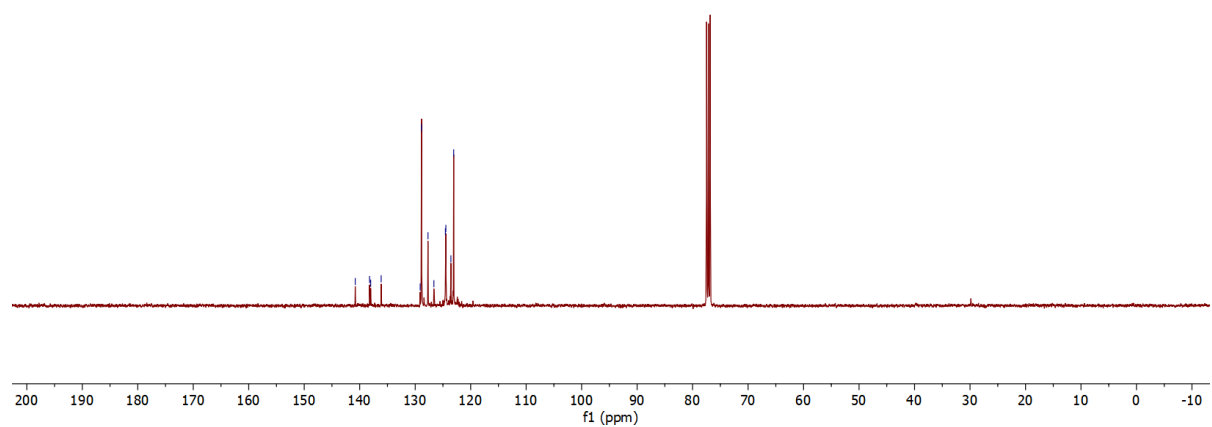

## Arene variation

## Toluene as arene (3ab)

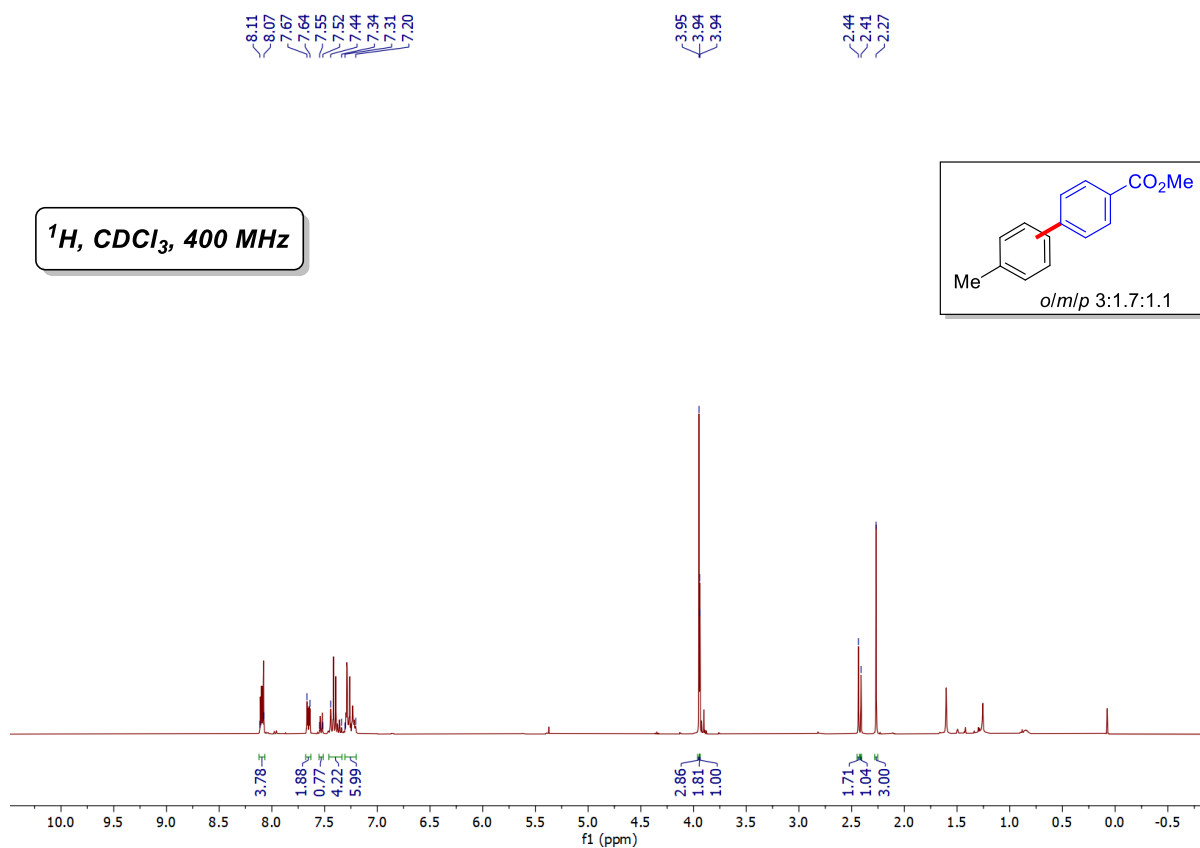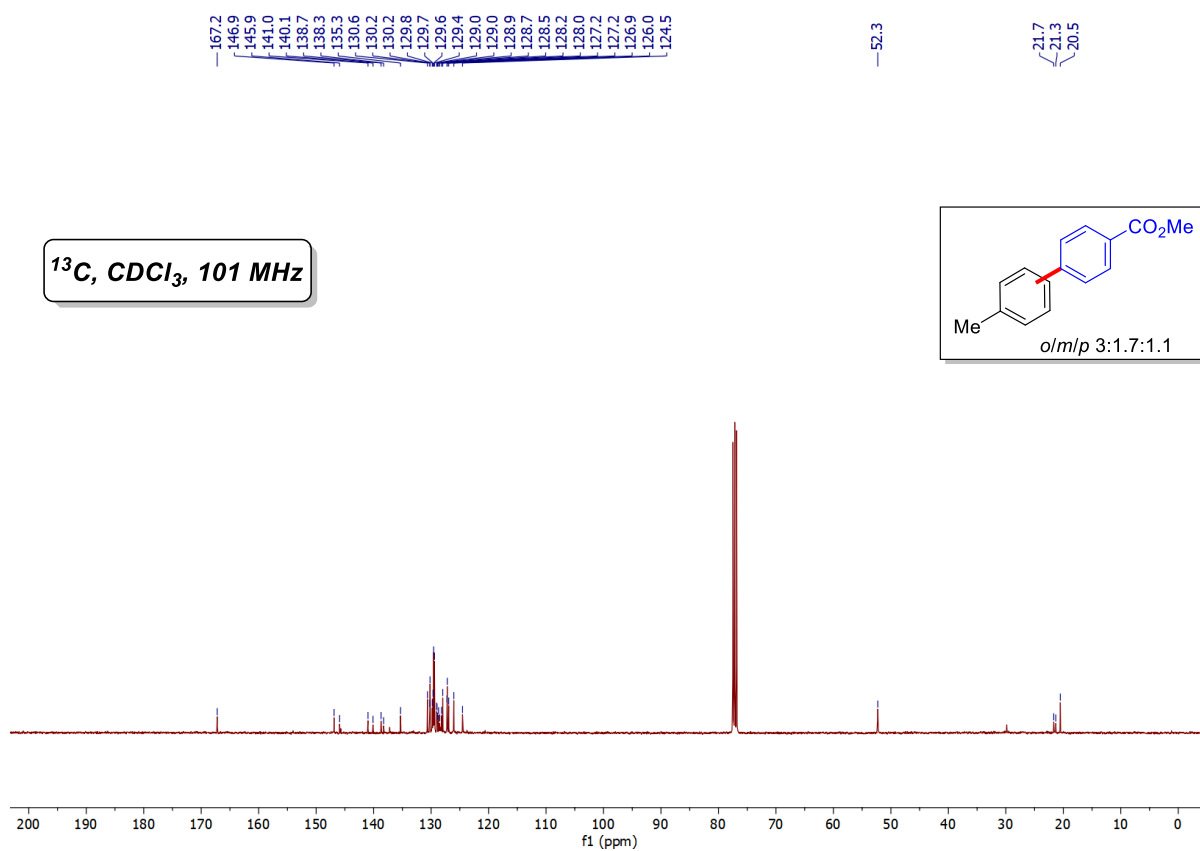

***Tert*-butylbenzene  
(3ac)****as****arene**

8.12  
8.08  
7.68  
7.65  
7.63  
7.62  
7.59  
7.56  
7.51  
7.48  
7.46  
7.43  
7.42  
7.38

3.94  
3.94

1.38  
1.37

 **$^1\text{H}$ ,  $\text{CDCl}_3$ , 400 MHz**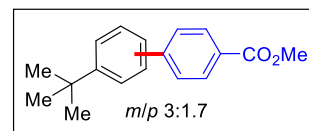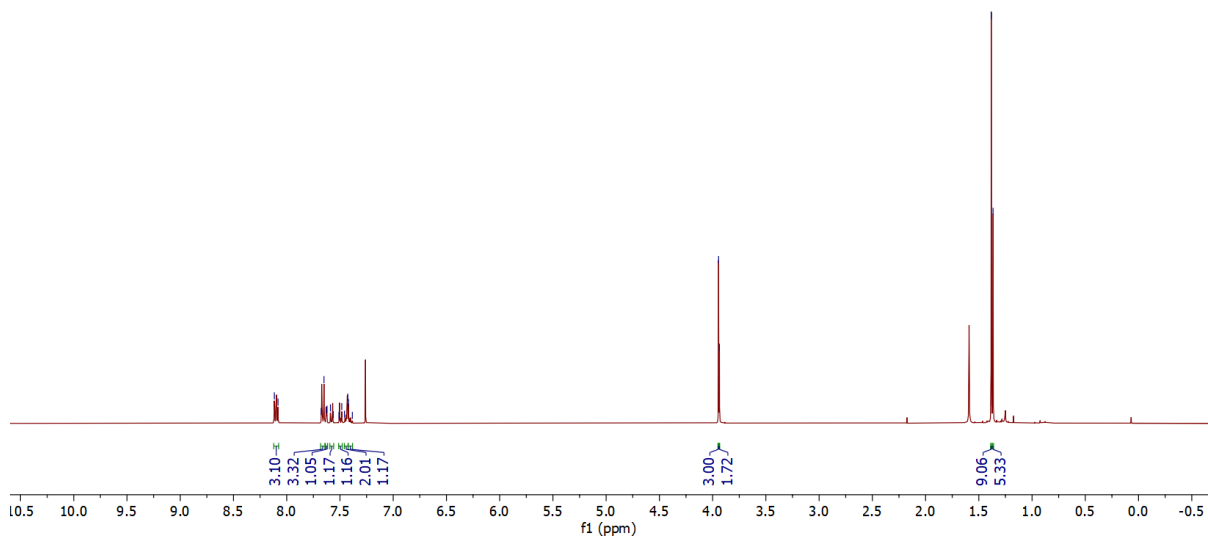 **$^{13}\text{C}$ ,  $\text{CDCl}_3$ , 101 MHz**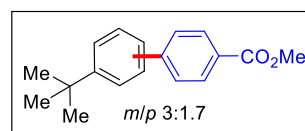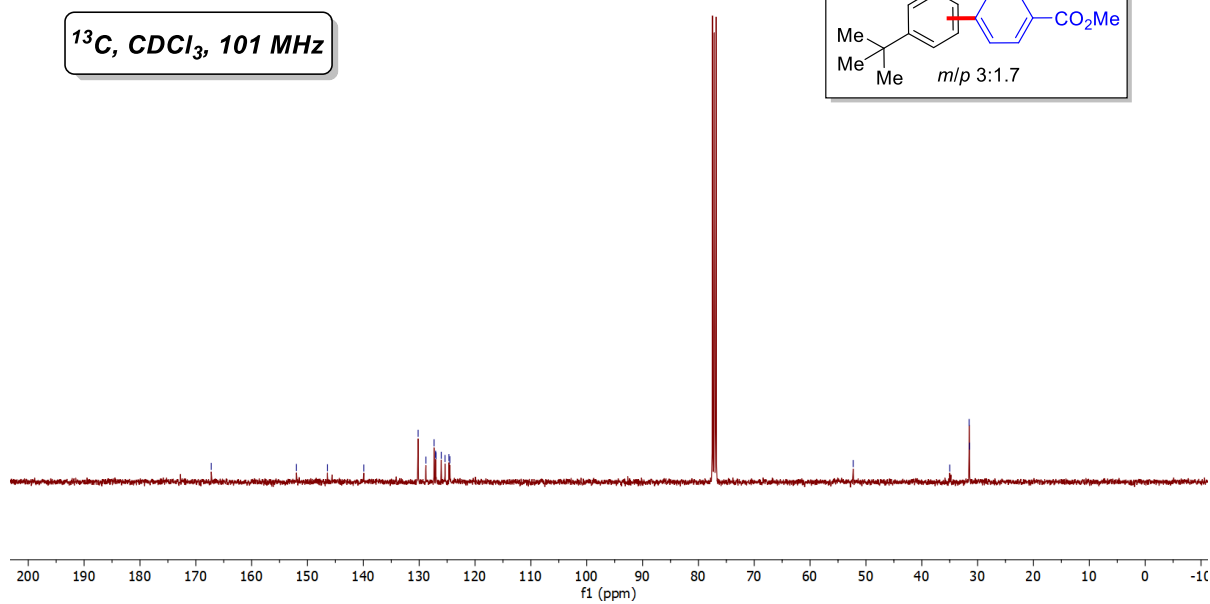

## methyl [1,1':2',1''-terphenyl]-4-carboxylate (3ad)

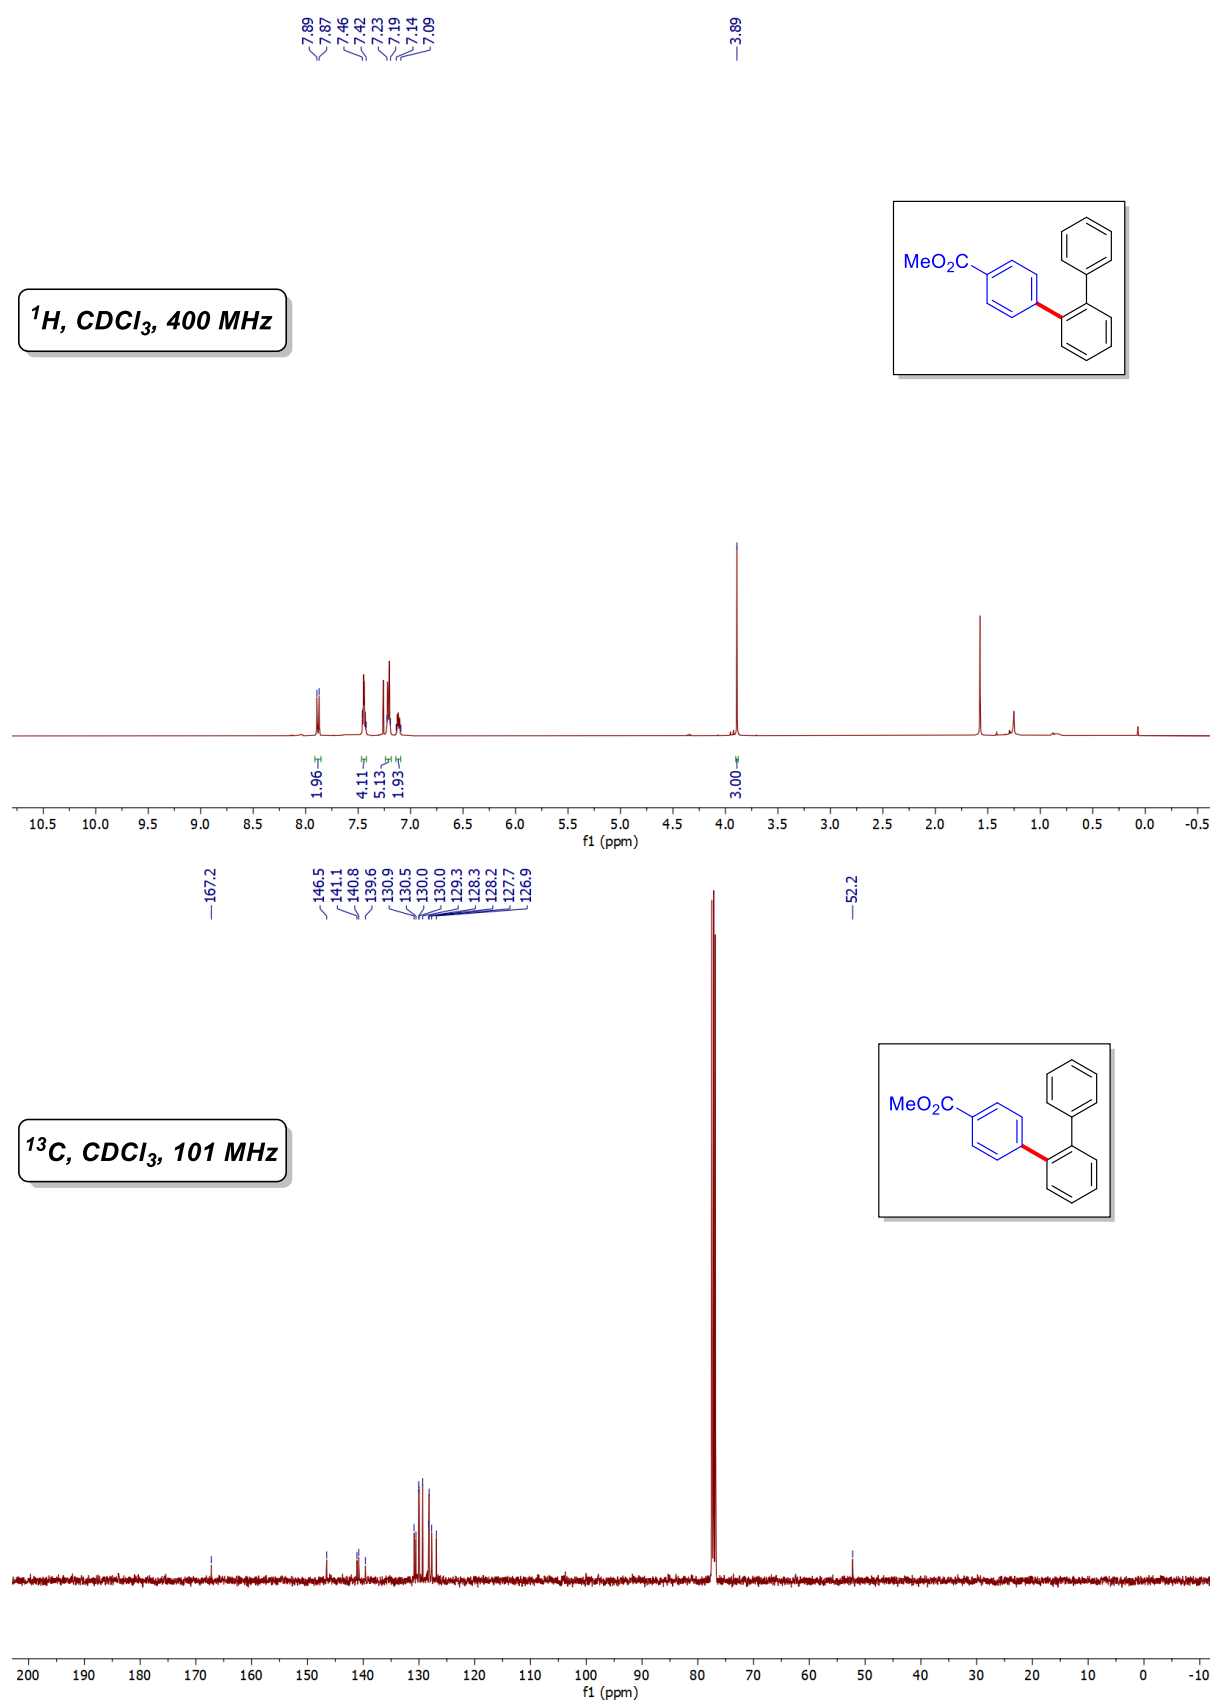



Fluorobenzene

as

arene

(3ae)

 $^1\text{H}$ ,  $\text{CDCl}_3$ , 400 MHz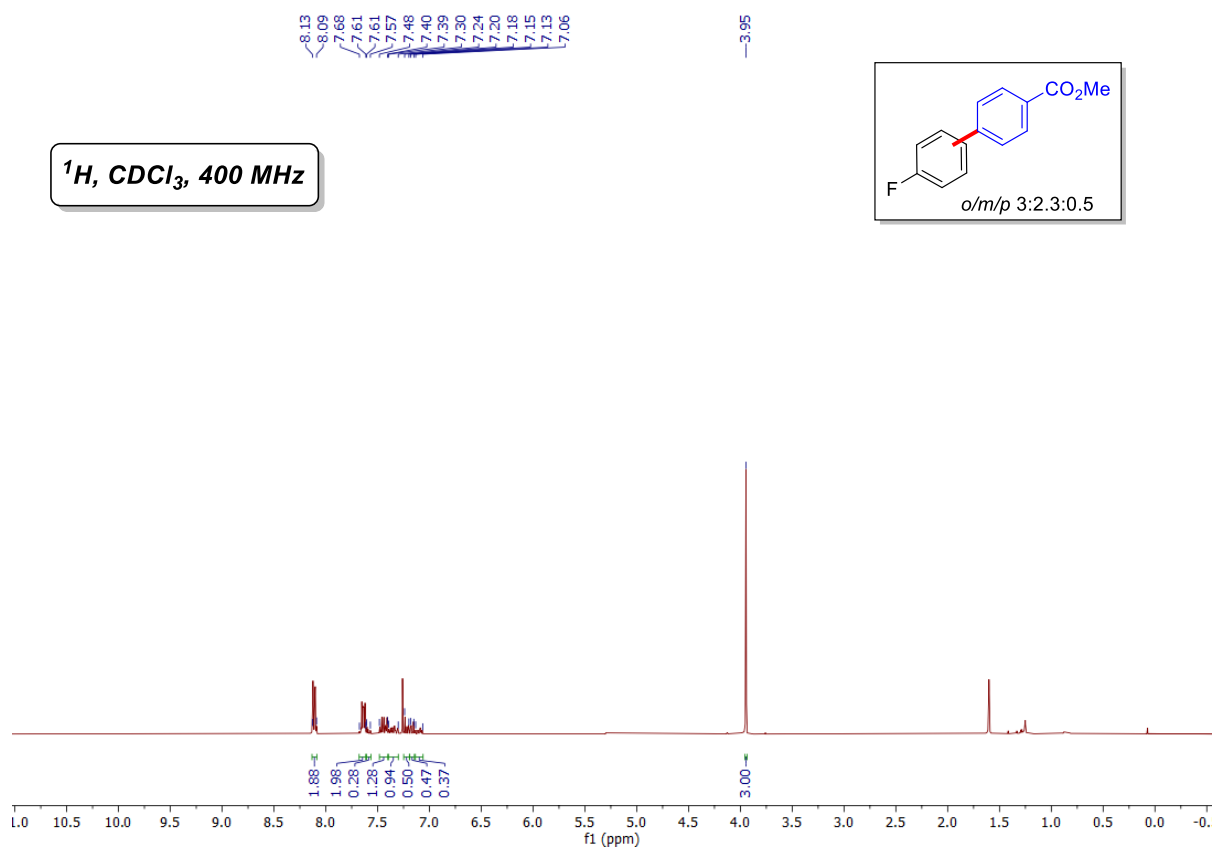

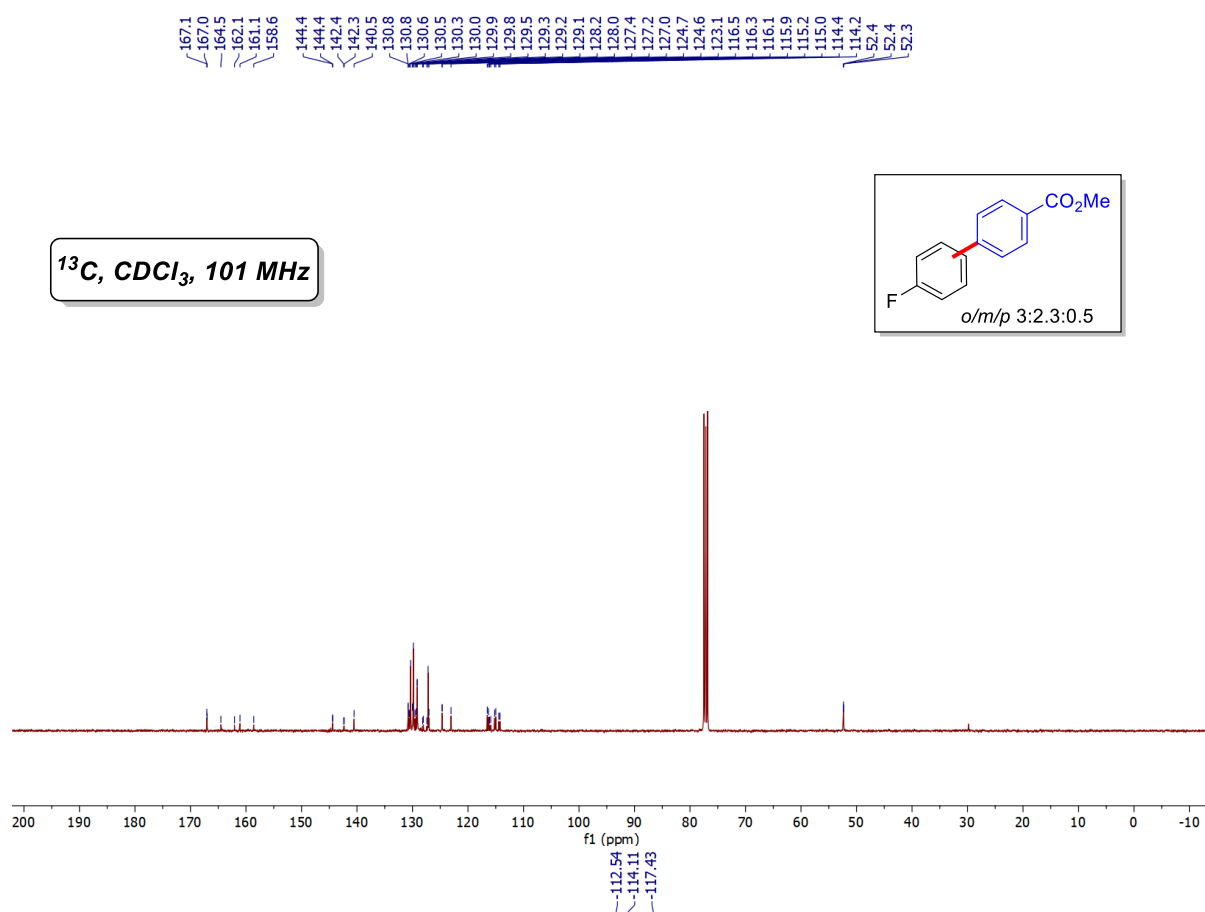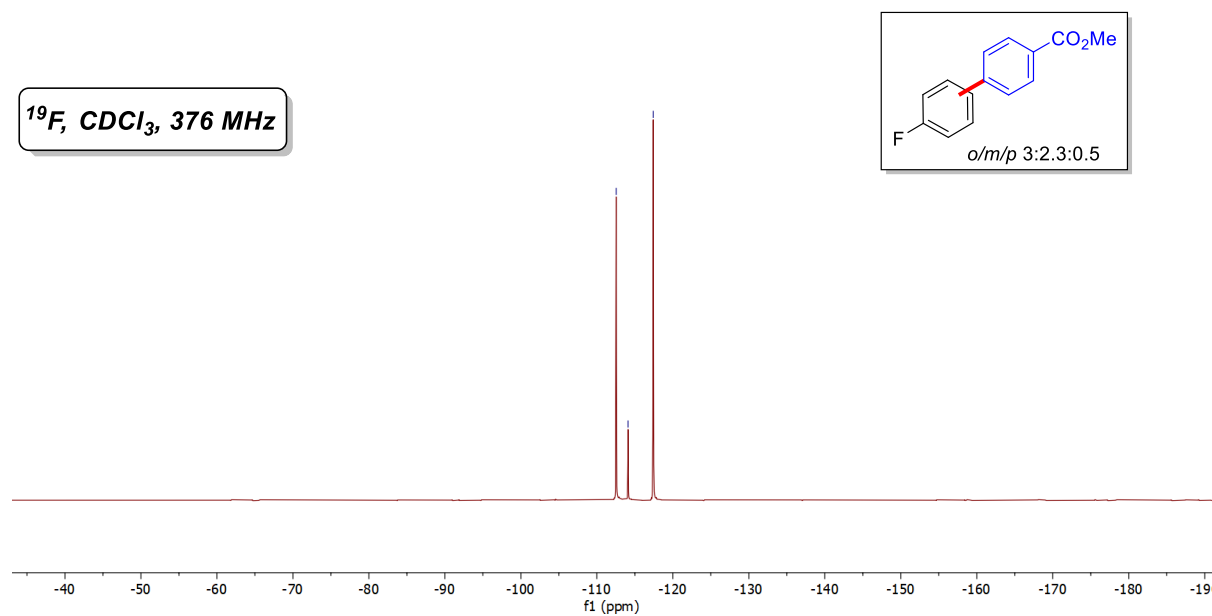

## methyl 2',4'-dimethyl-[1,1'-biphenyl]-4-carboxylate (3af)

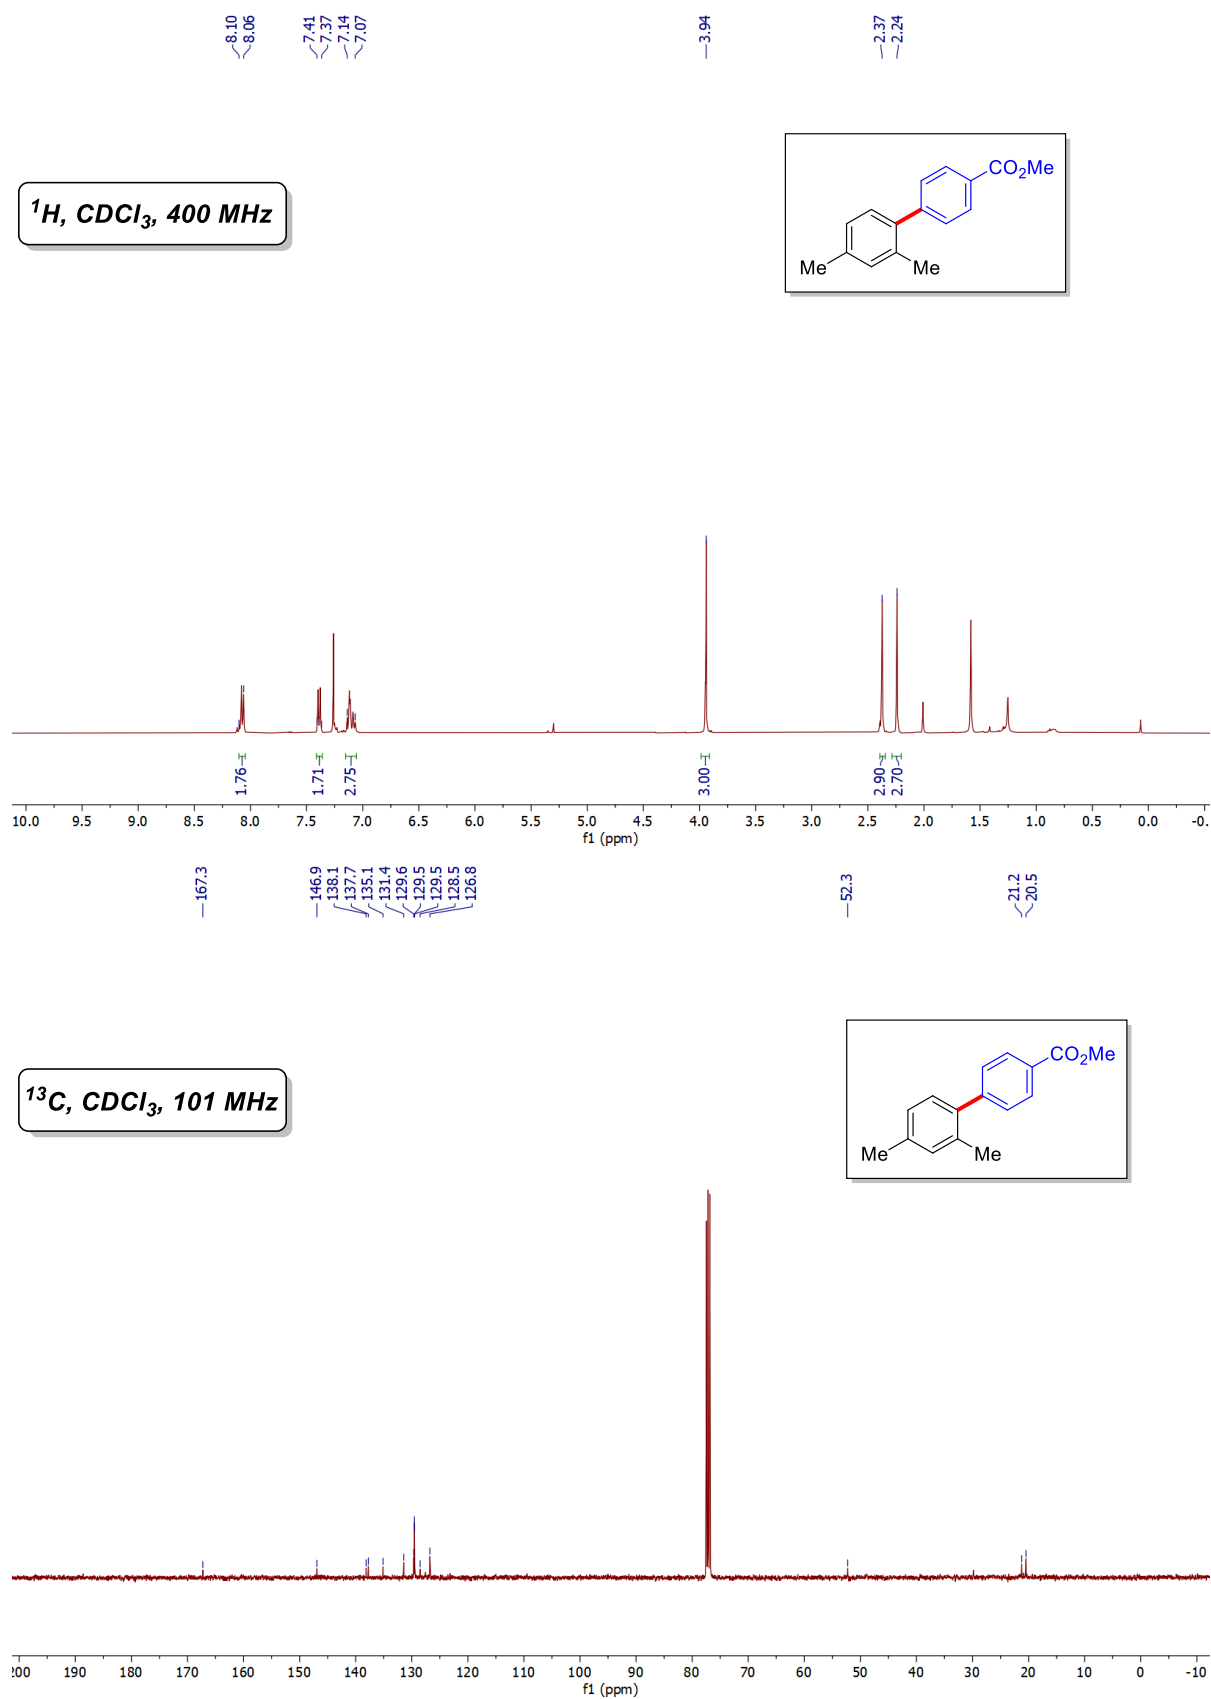

## methyl 2',5'-dimethyl-[1,1'-biphenyl]-4-carboxylate (3ag)

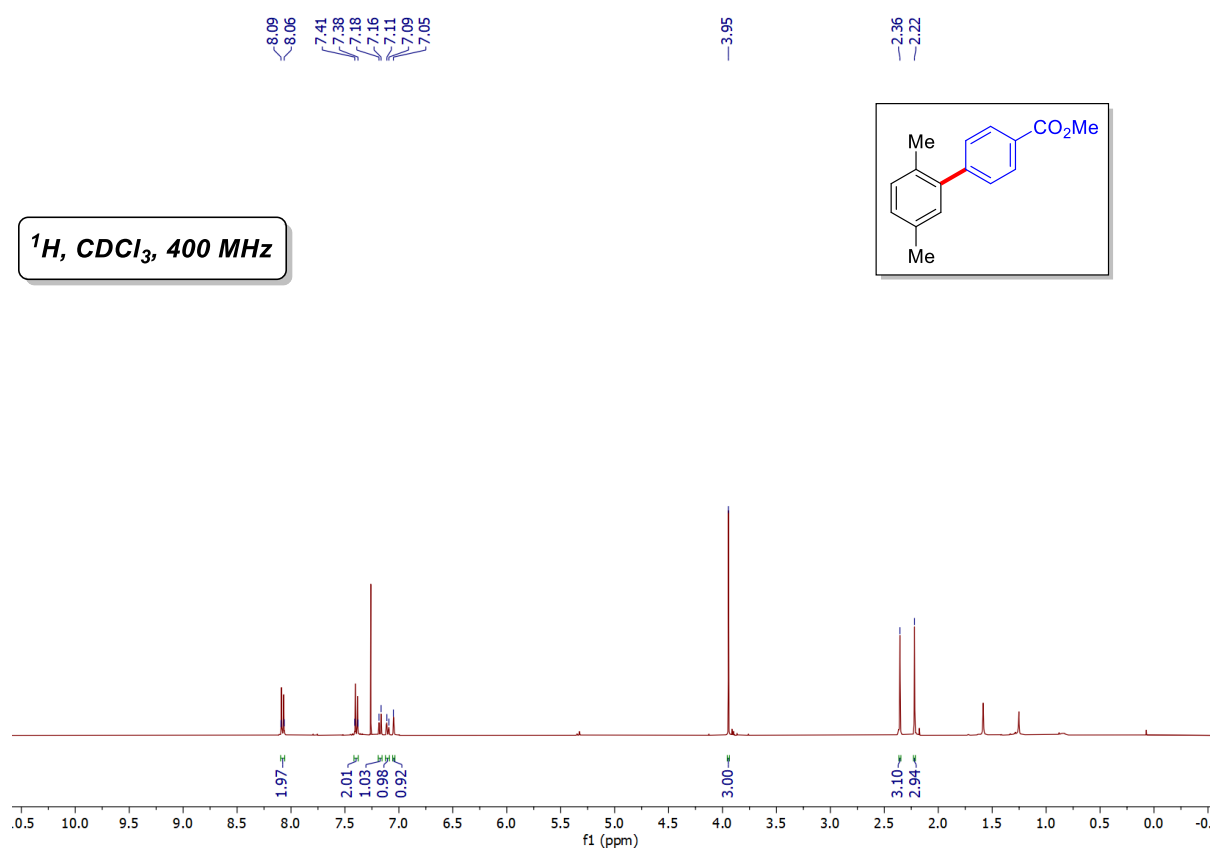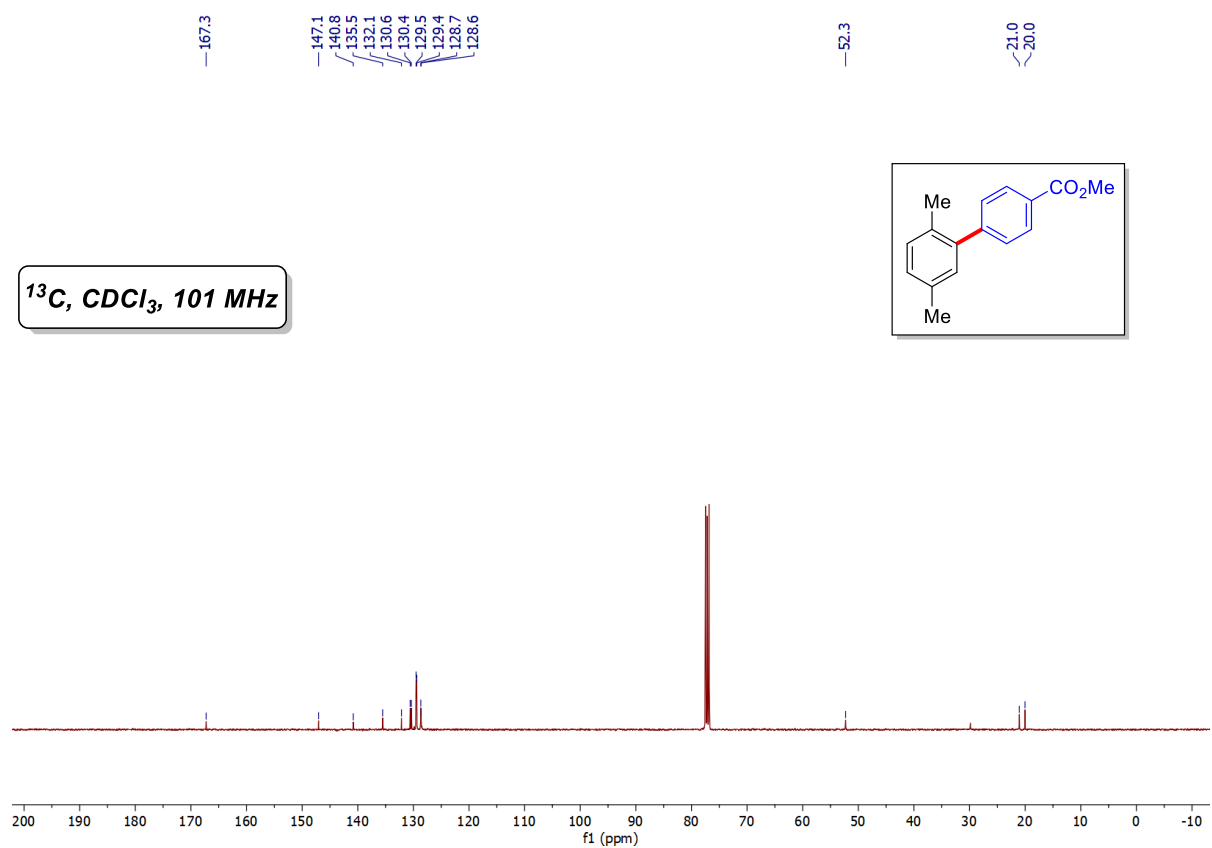

methyl 4-(naphthalen-1-yl)benzoate (3ah) (C<sub>1</sub>)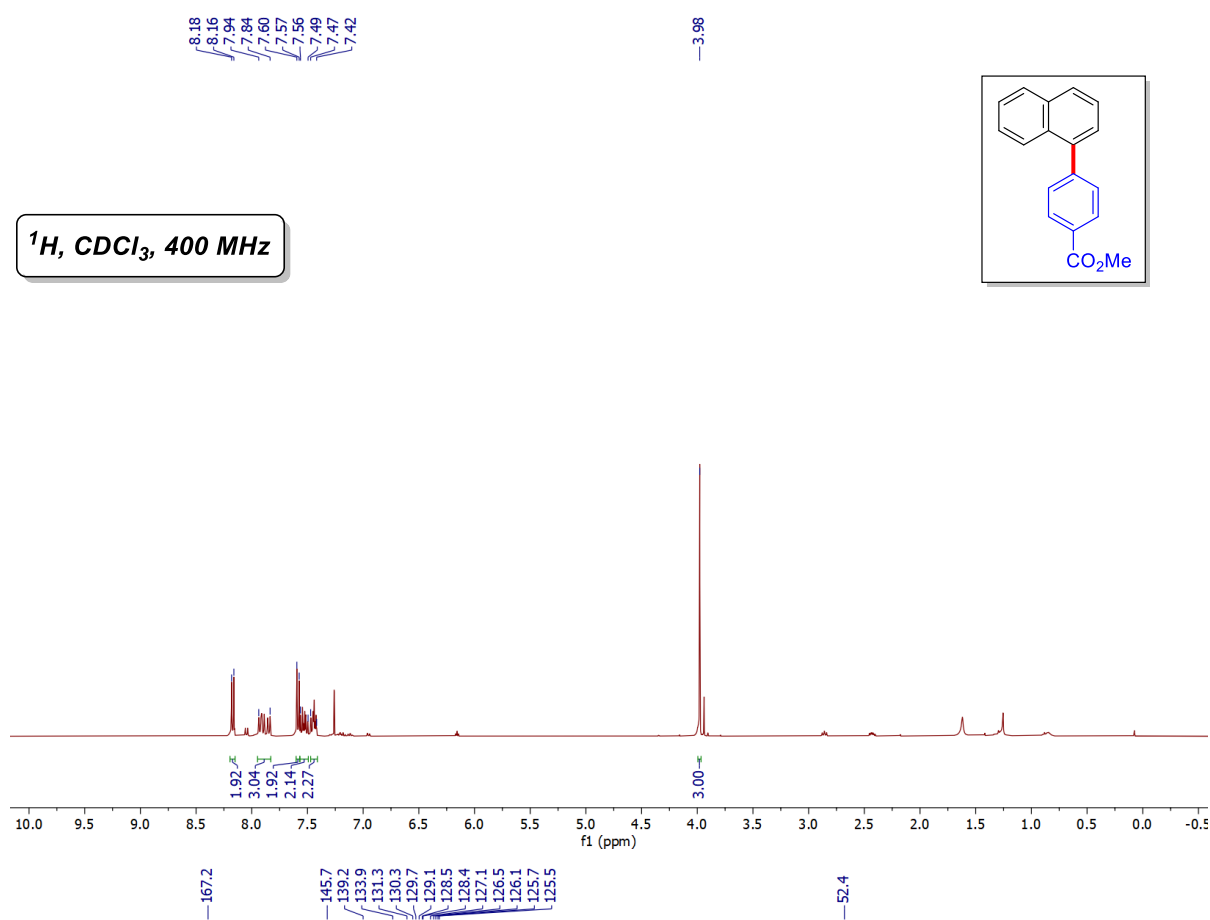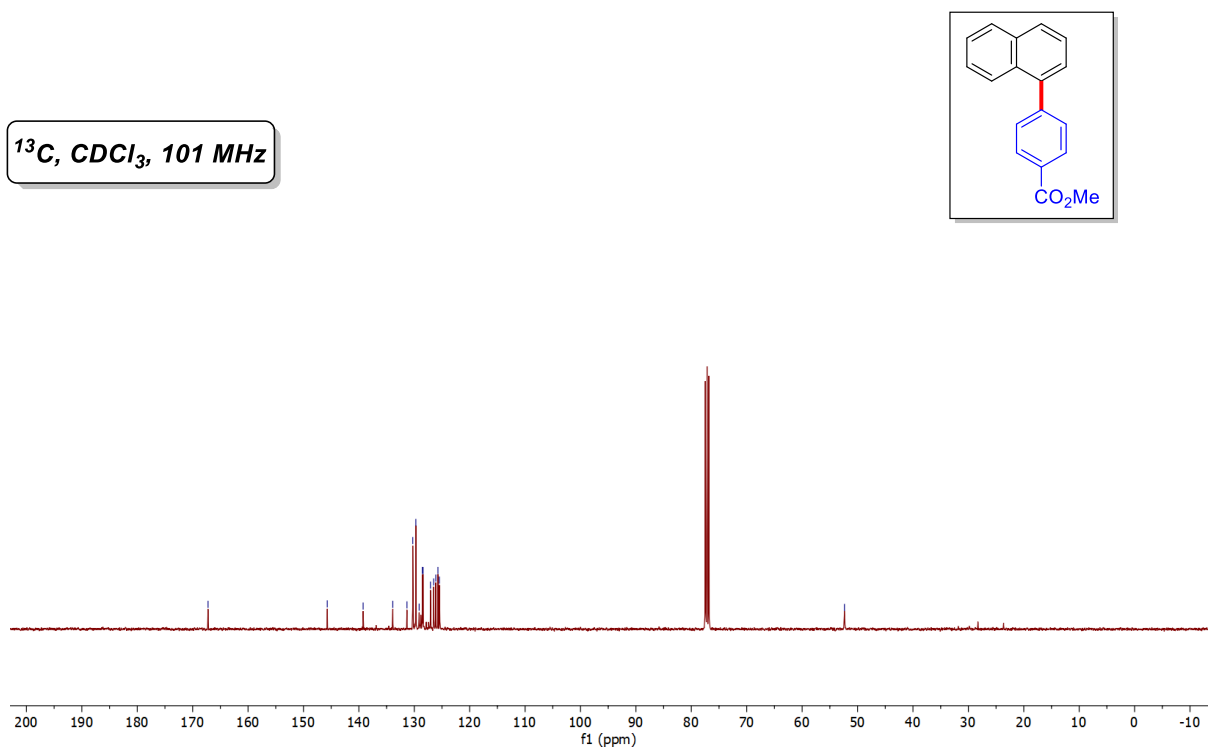

methyl 4-(naphthalen-2-yl)benzoate (3ah) (C<sub>2</sub>)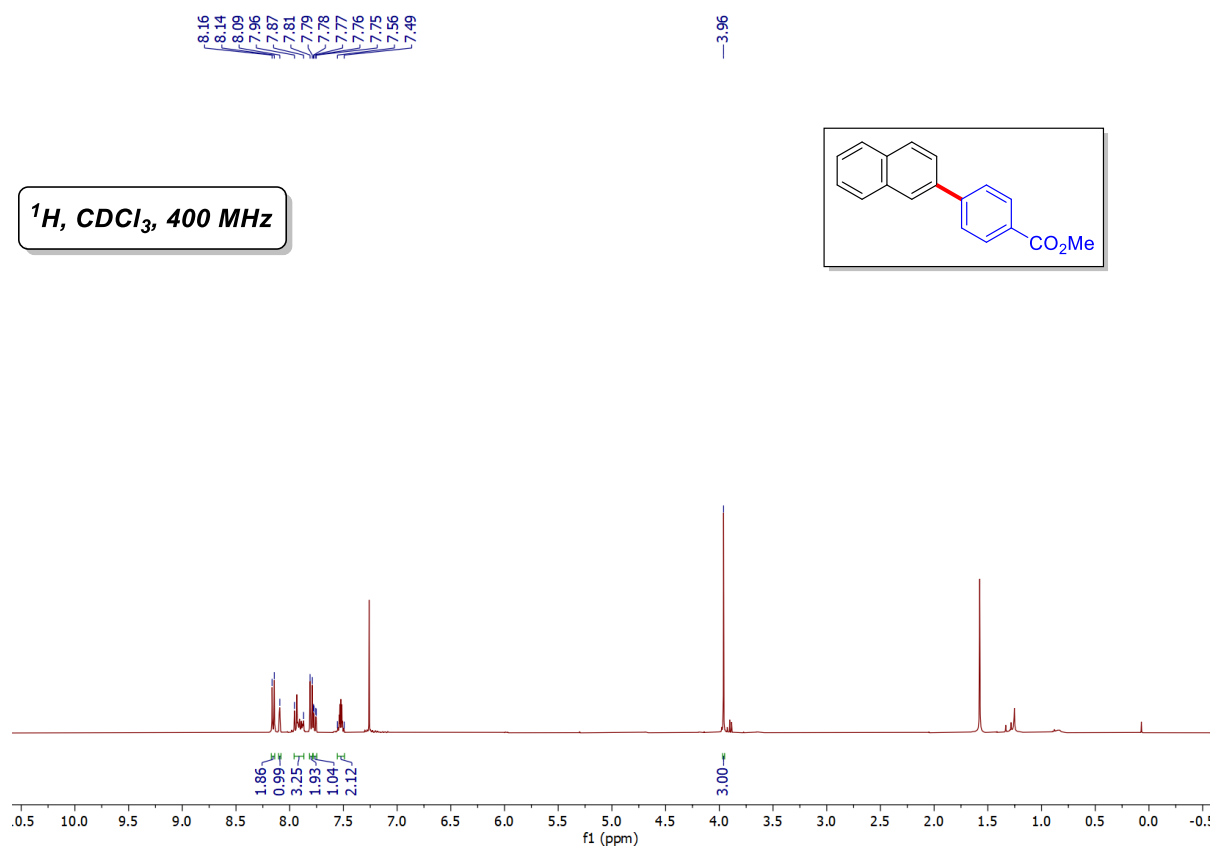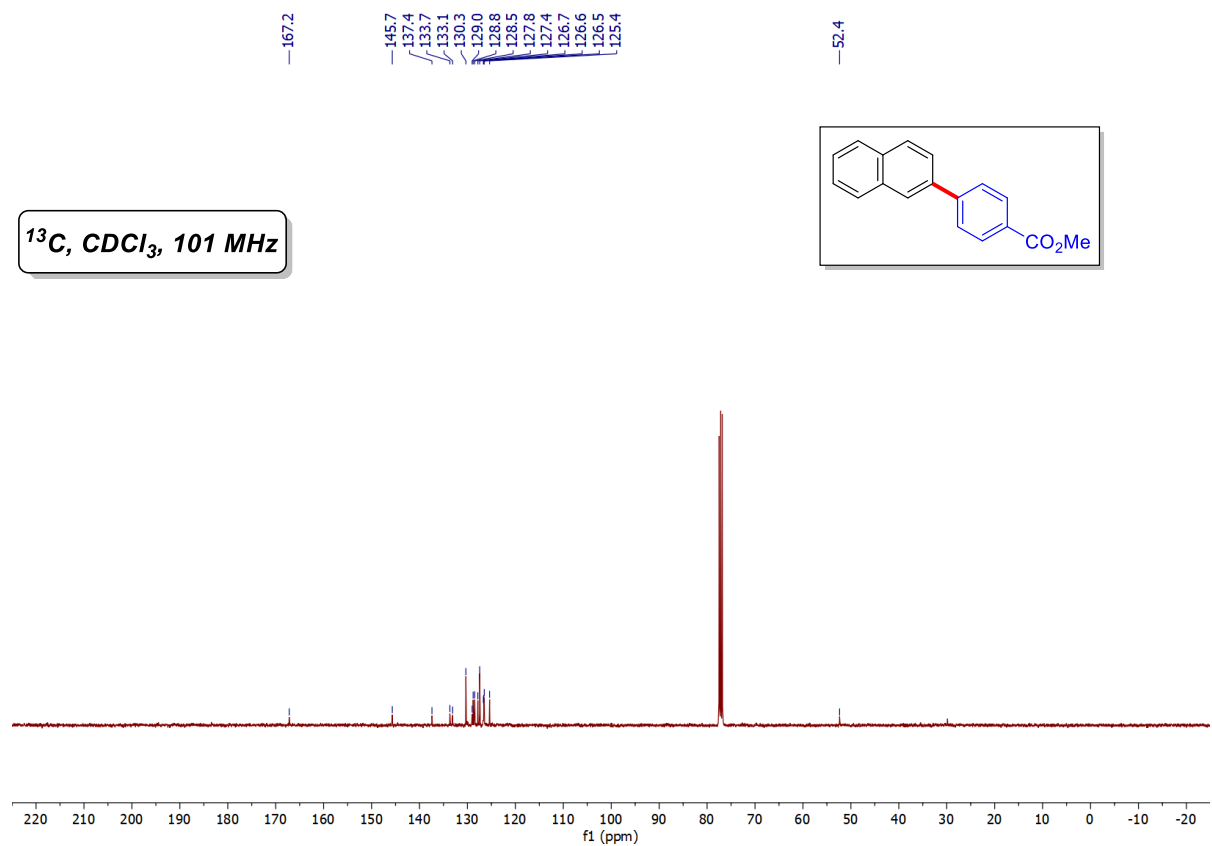

## methyl 2',4',6'-trimethyl-[1,1'-biphenyl]-4-carboxylate (3ai)

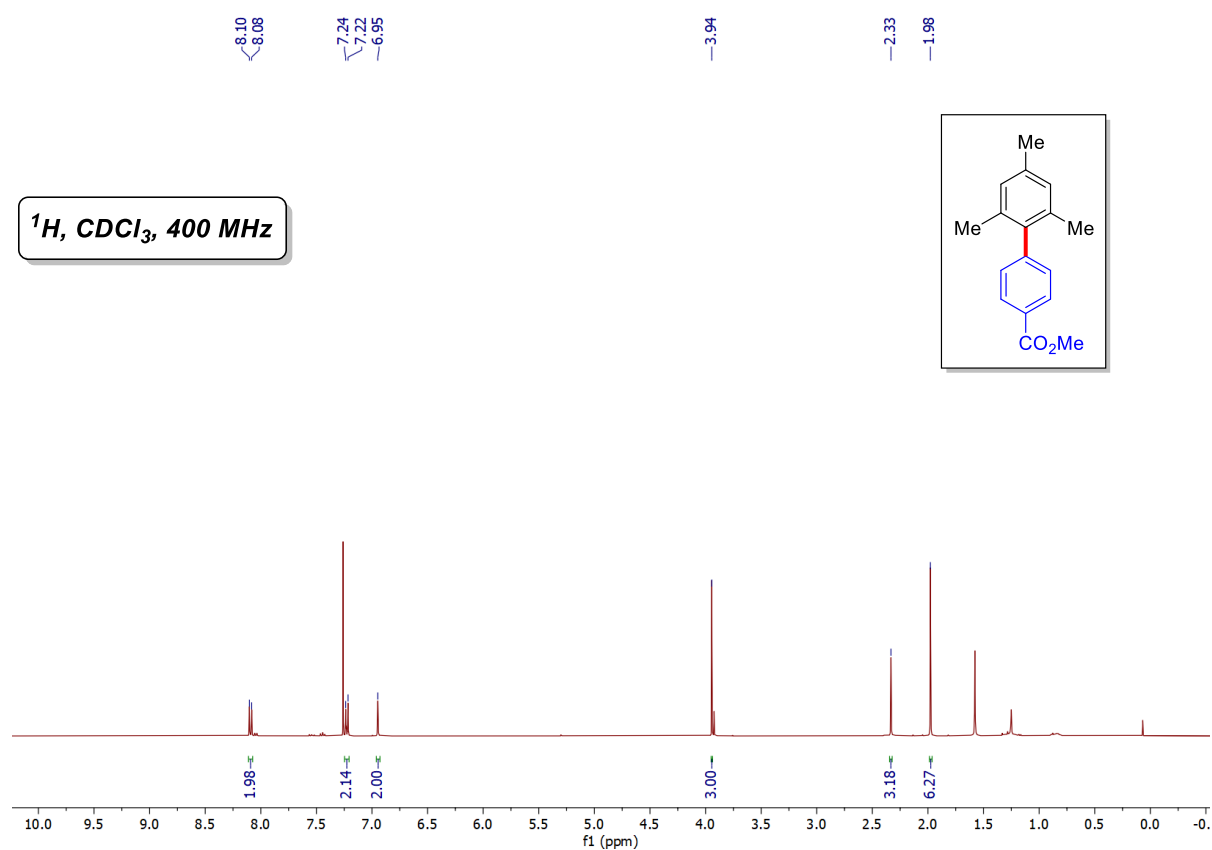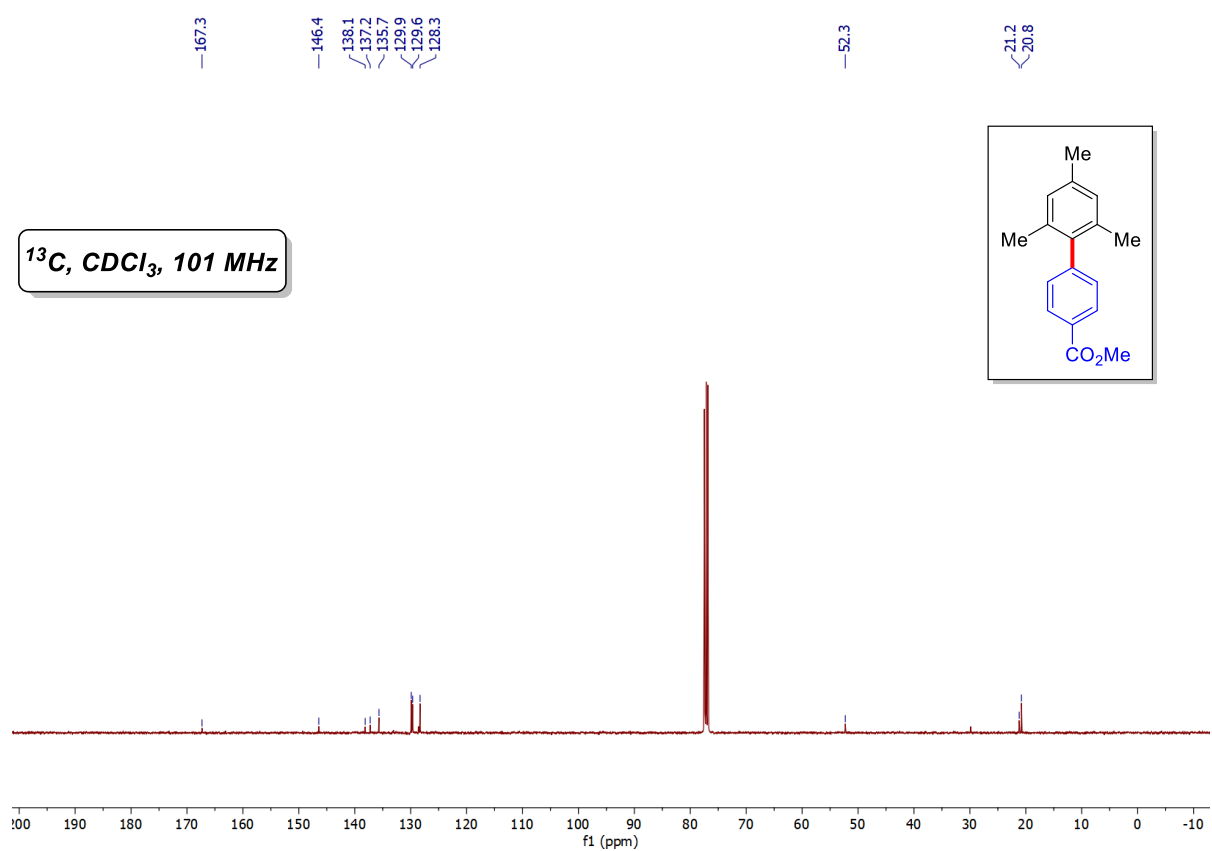

Anthracene as arene (**3aj**): ( $C^{10}/\text{others} = 5:4$ )

methyl 4-(anthracen-9-yl)benzoate (**3aj**) ( $C^{10}$ )

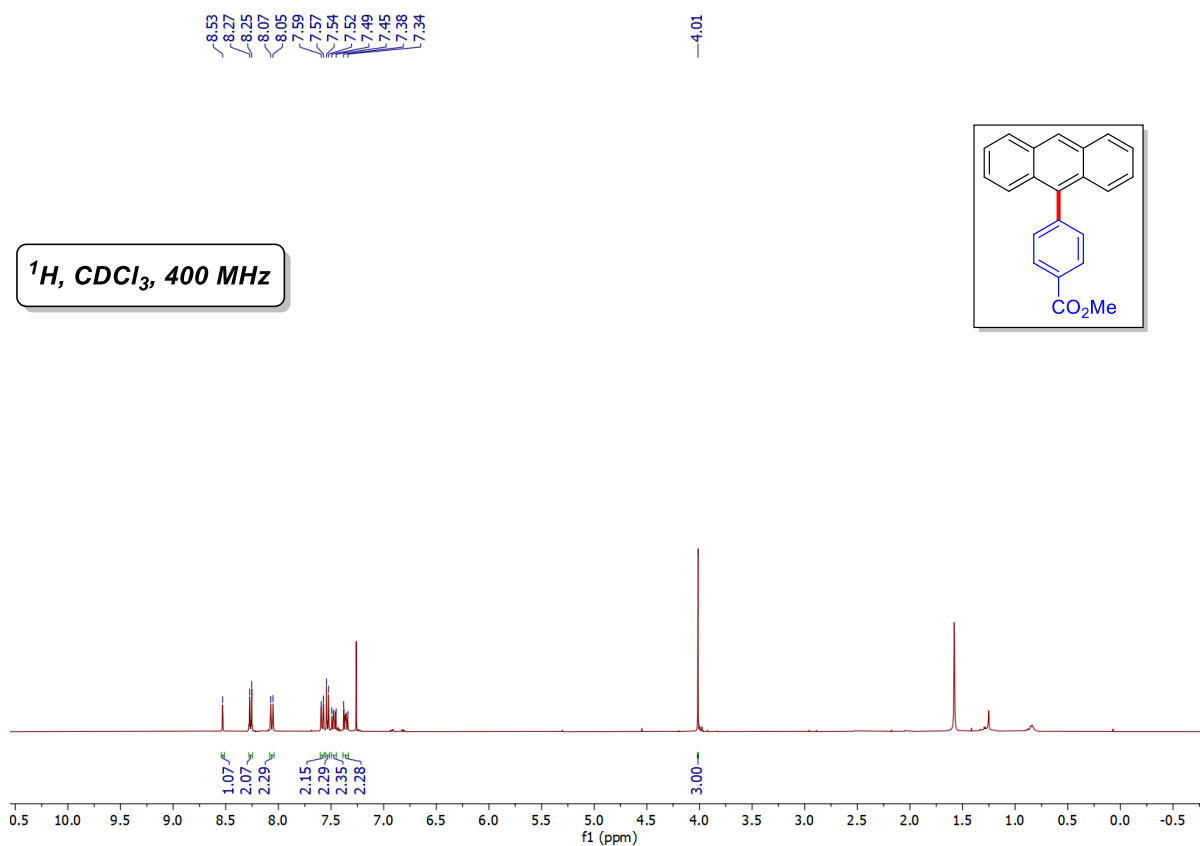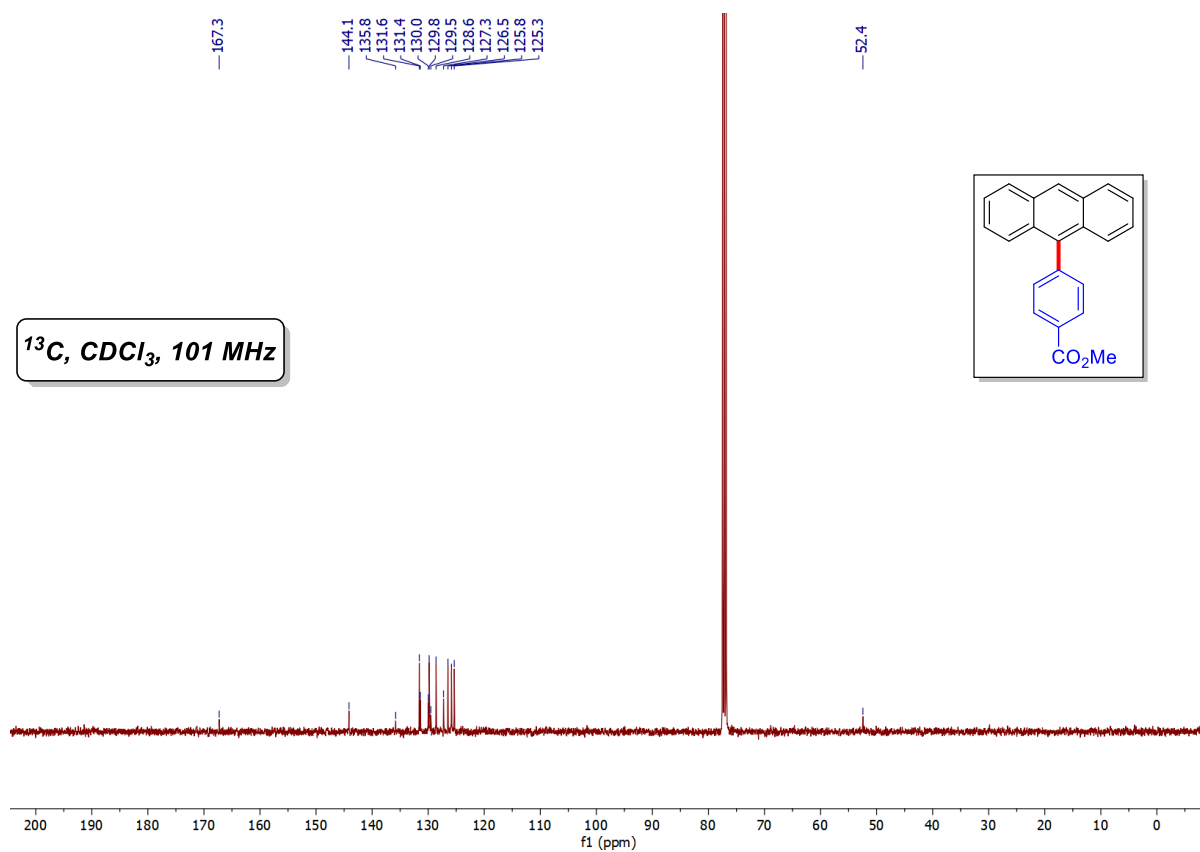



methyl 4-(anthracen-9-yl)benzoate (3aj) (C<sub>1</sub> and C<sub>2</sub>)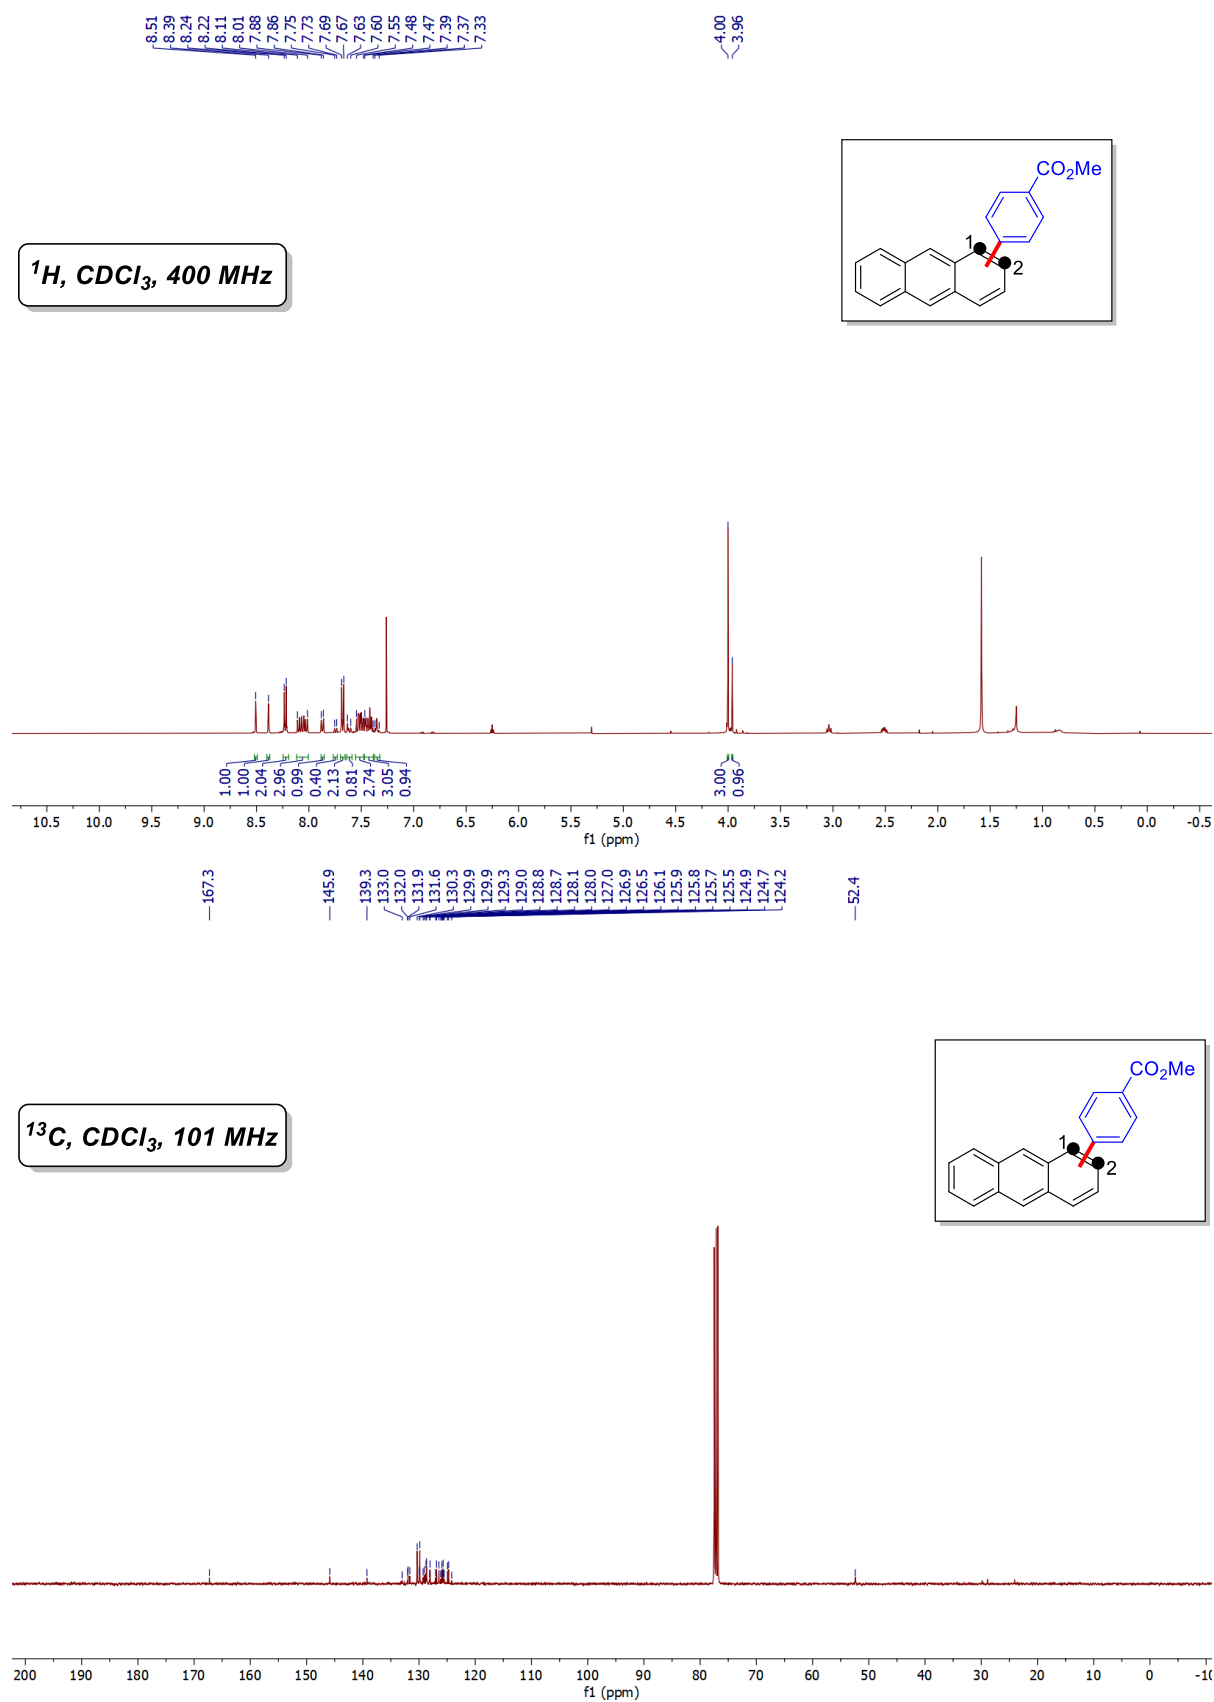

## methyl 4-(4-methylquinolin-5-yl)benzoate (3ak)

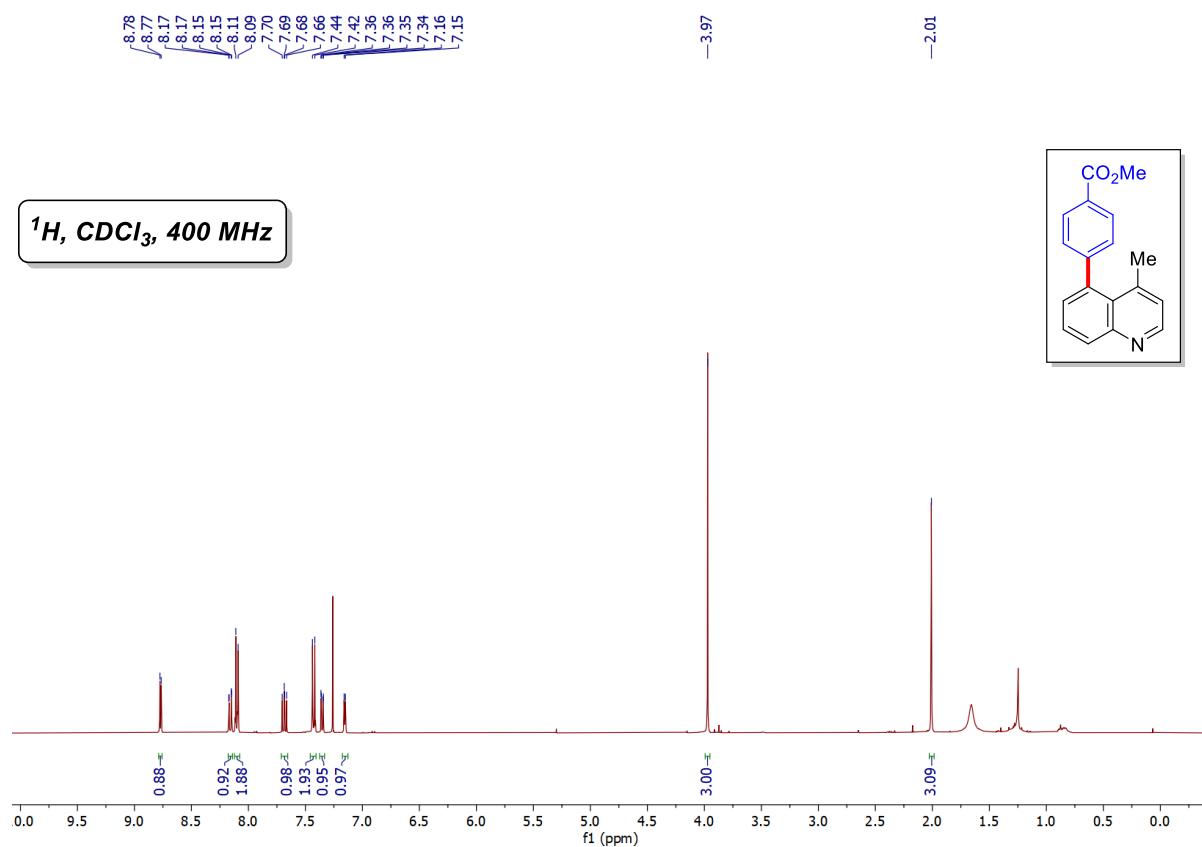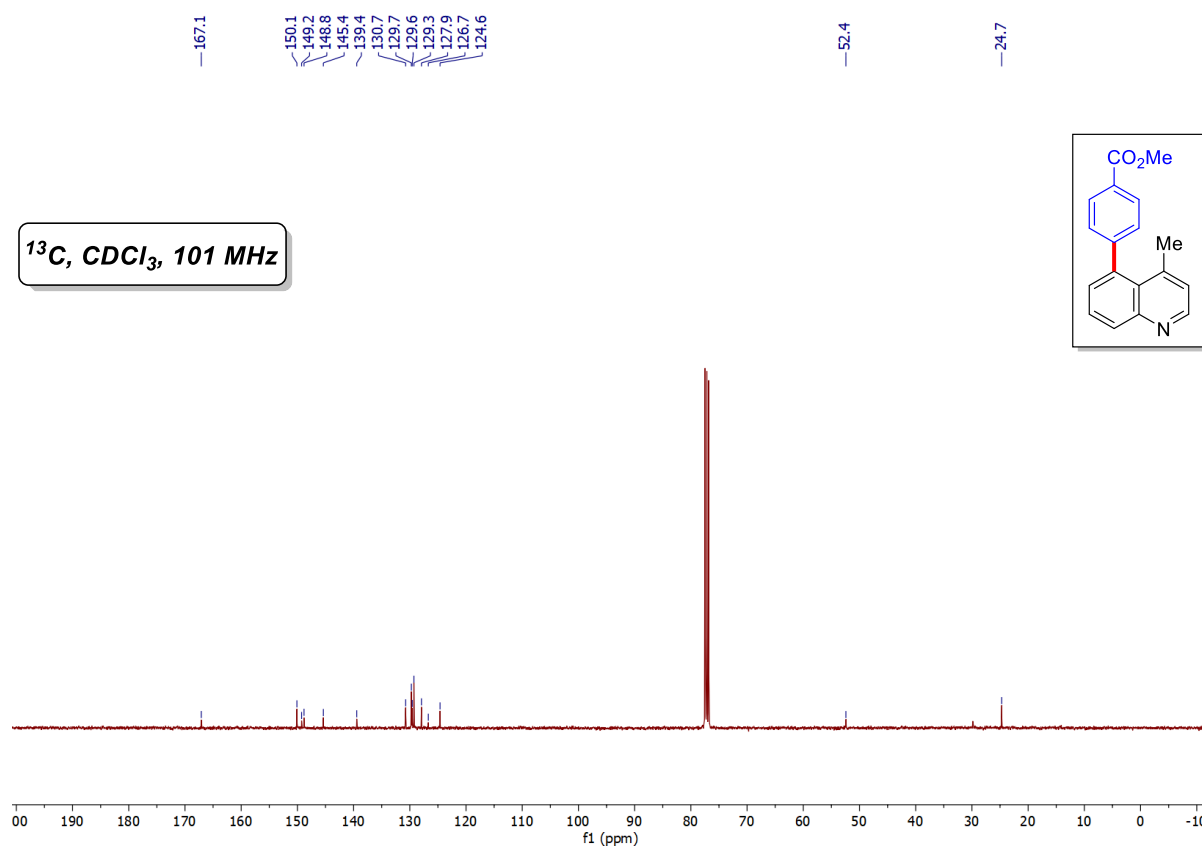

## methyl 4-(quinoxalin-5-yl)benzoate (3al)

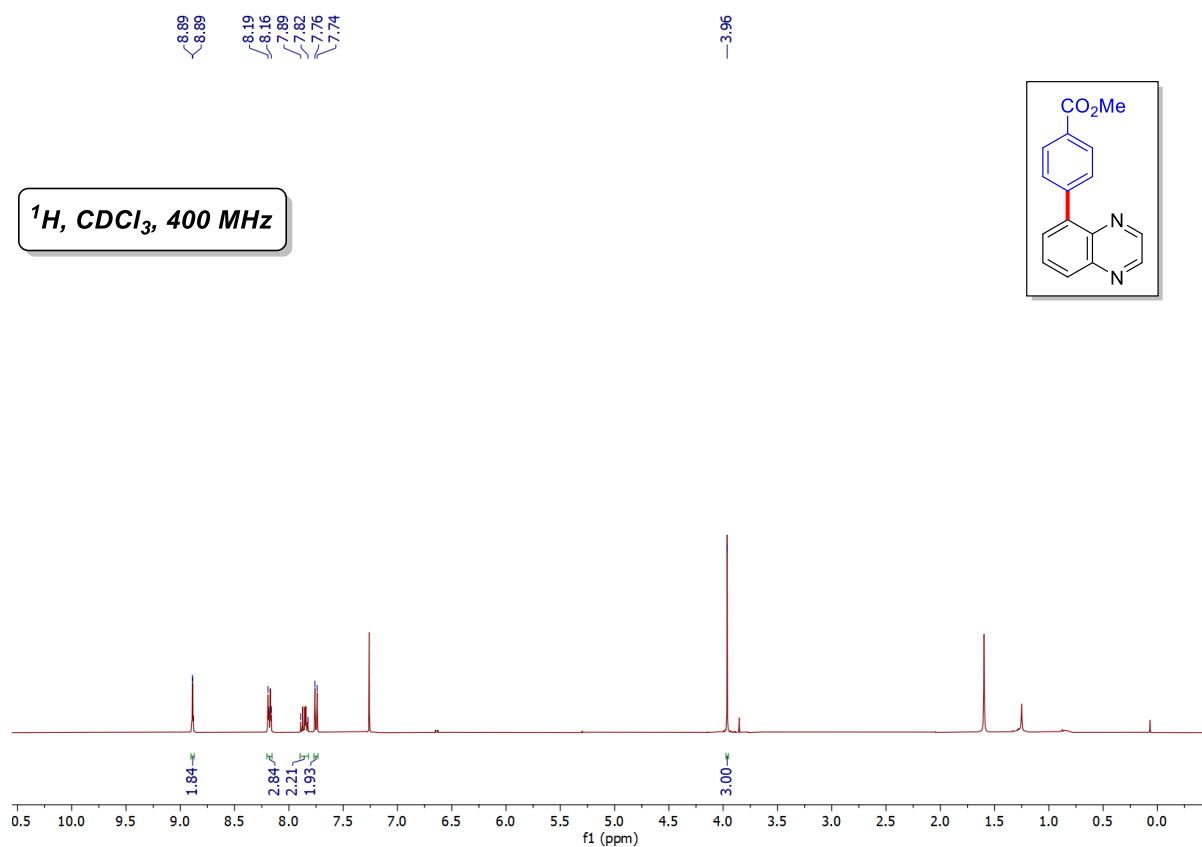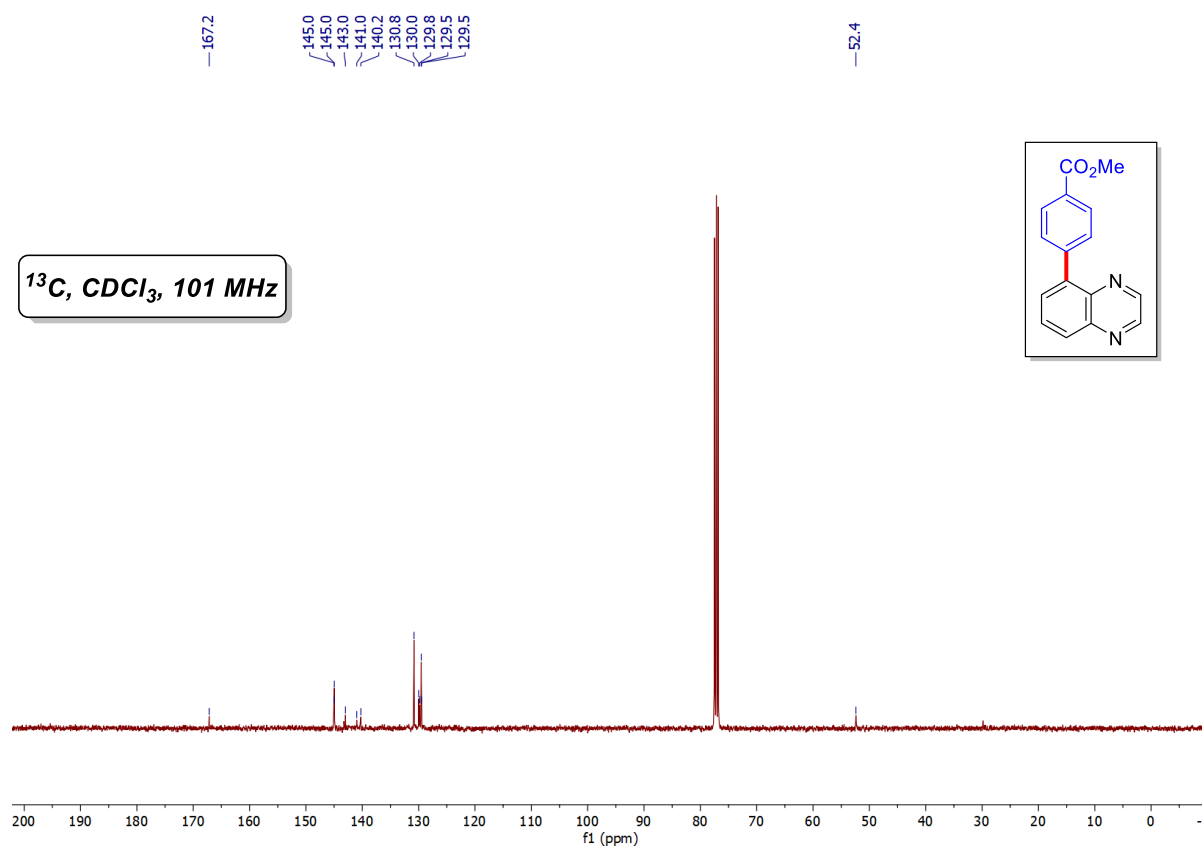

## methyl 4-(1H-pyrrol-2-yl)benzoate (3am)

 $^1\text{H}$ ,  $\text{CDCl}_3$ , 400 MHz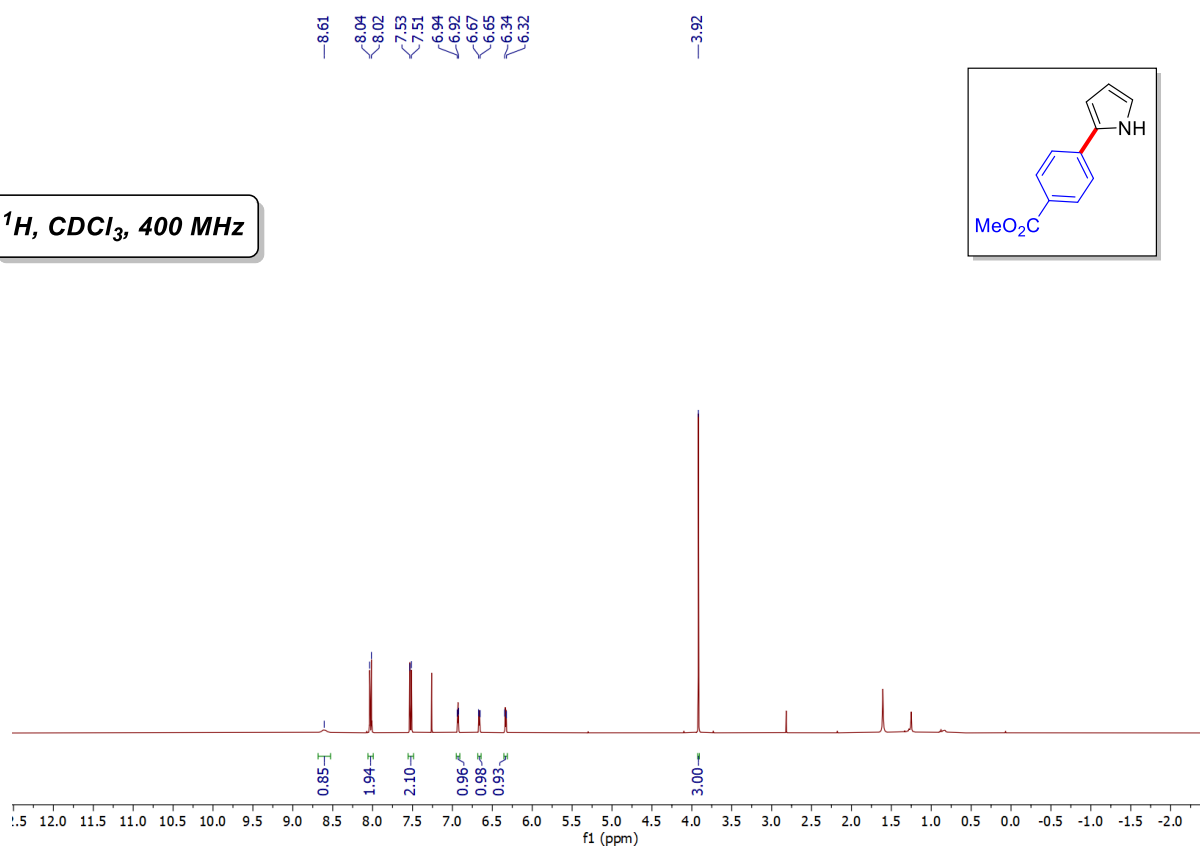 $^{13}\text{C}$ ,  $\text{CDCl}_3$ , 101 MHz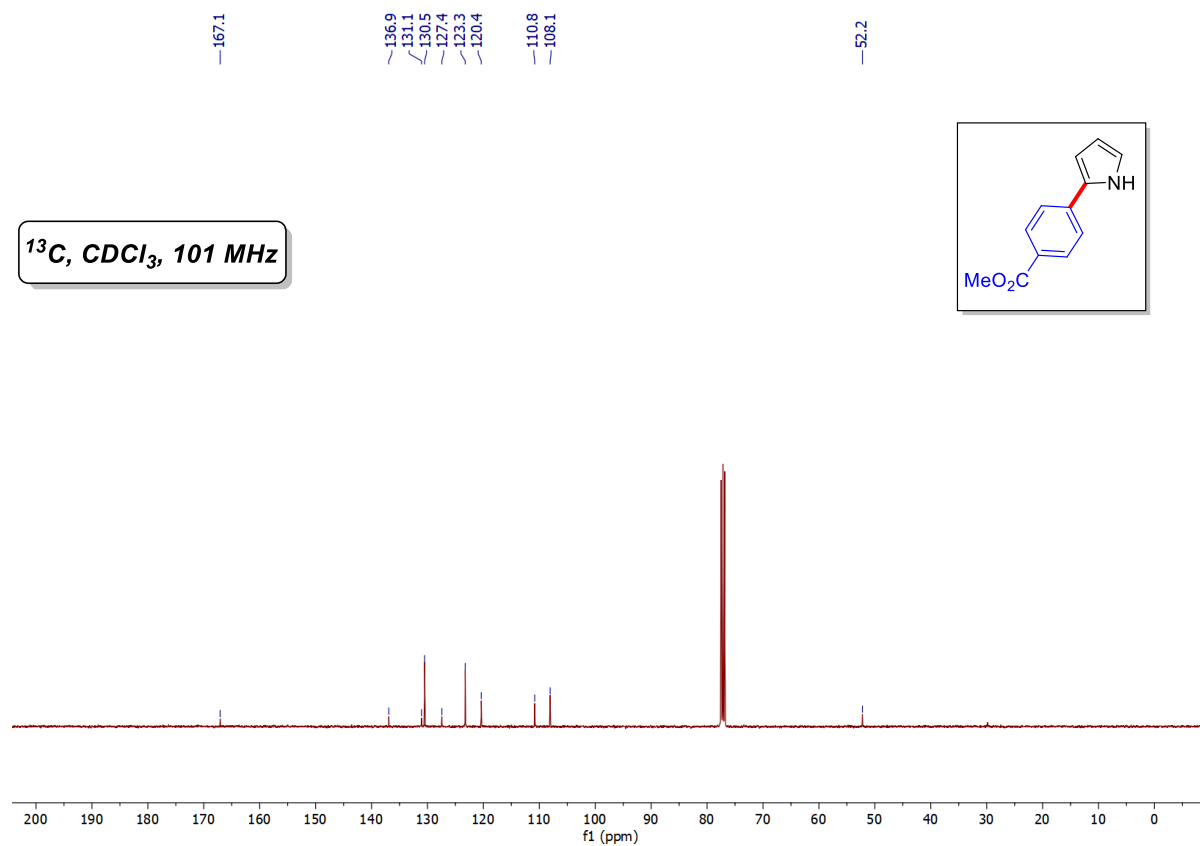

## methyl 4-(furan-2-yl)benzoate (3an)

 $^1\text{H}$ ,  $\text{CDCl}_3$ , 400 MHz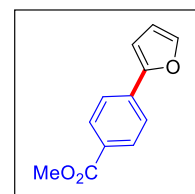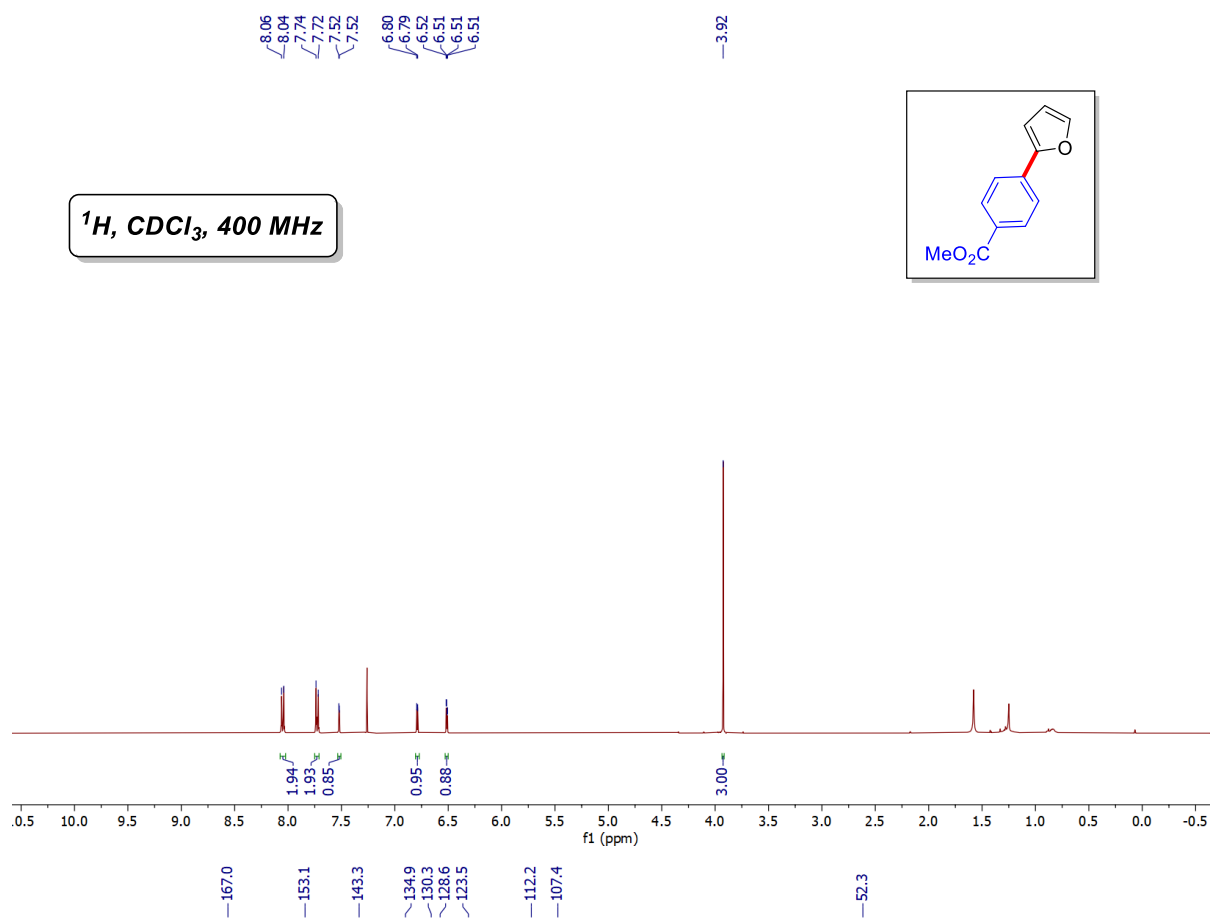 $^{13}\text{C}$ ,  $\text{CDCl}_3$ , 101 MHz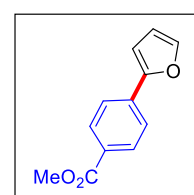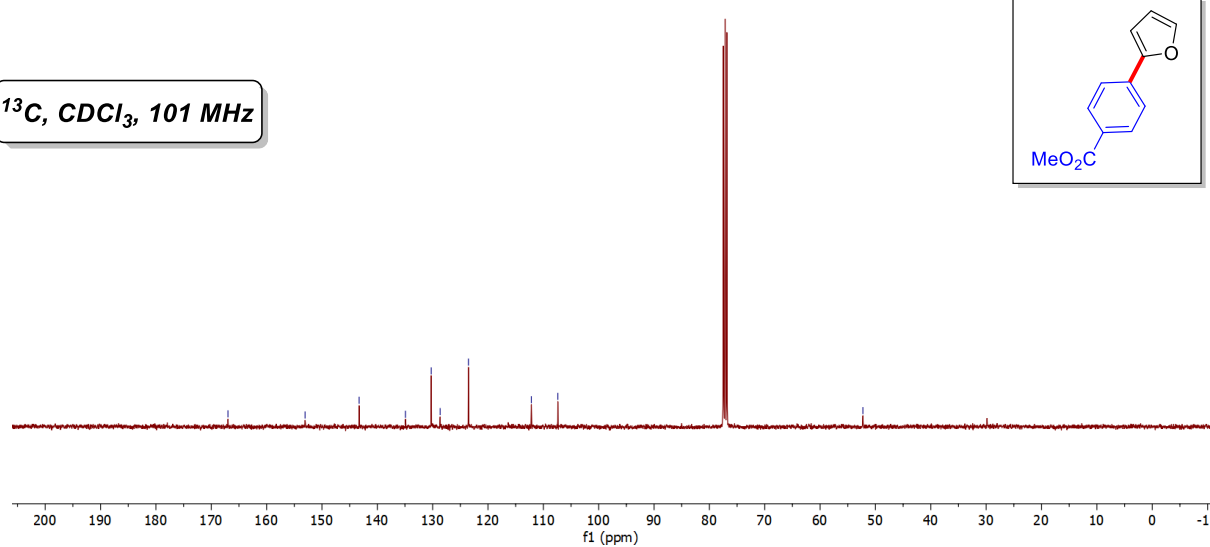

## methyl 4-(thiophen-2-yl)benzoate (3ao)

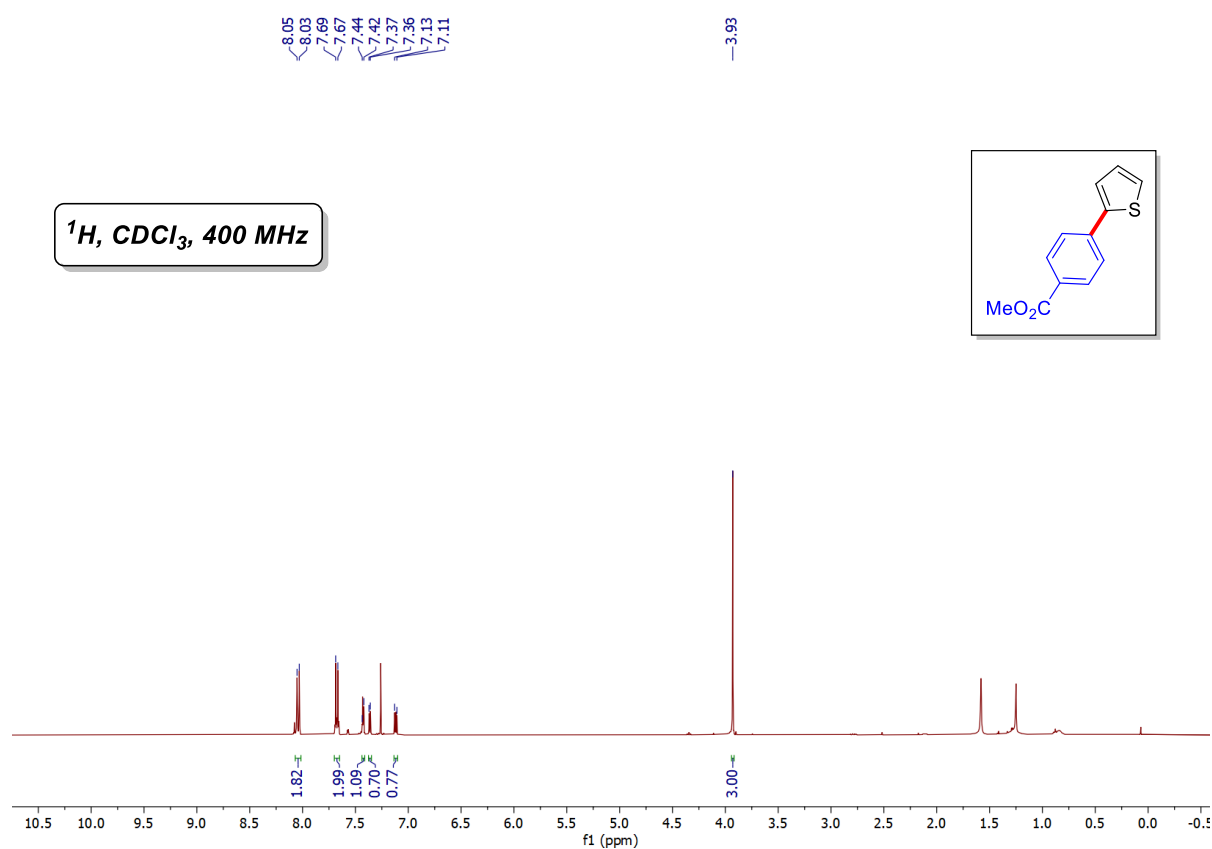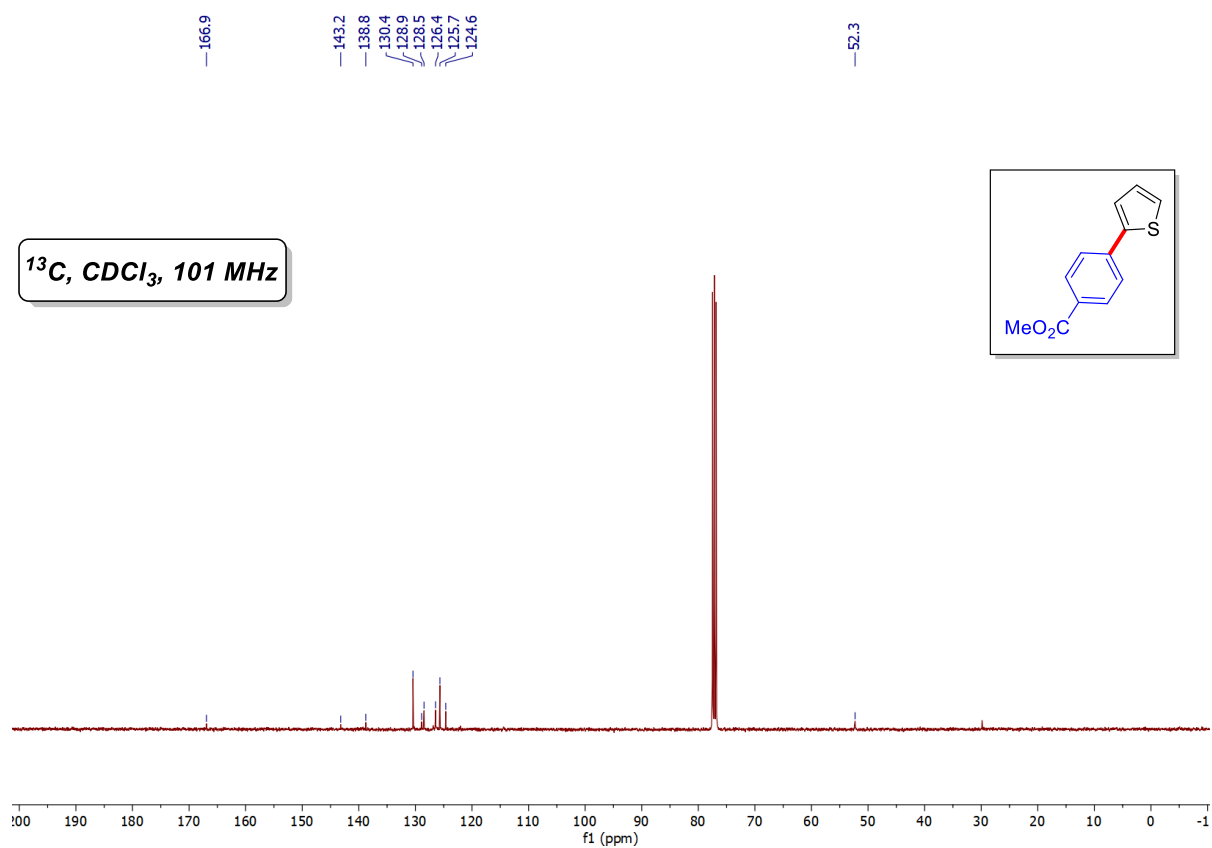

## 2-isopropyl-5-methylcyclohexyl [1,1'-biphenyl]-4-carboxylate (3ta)

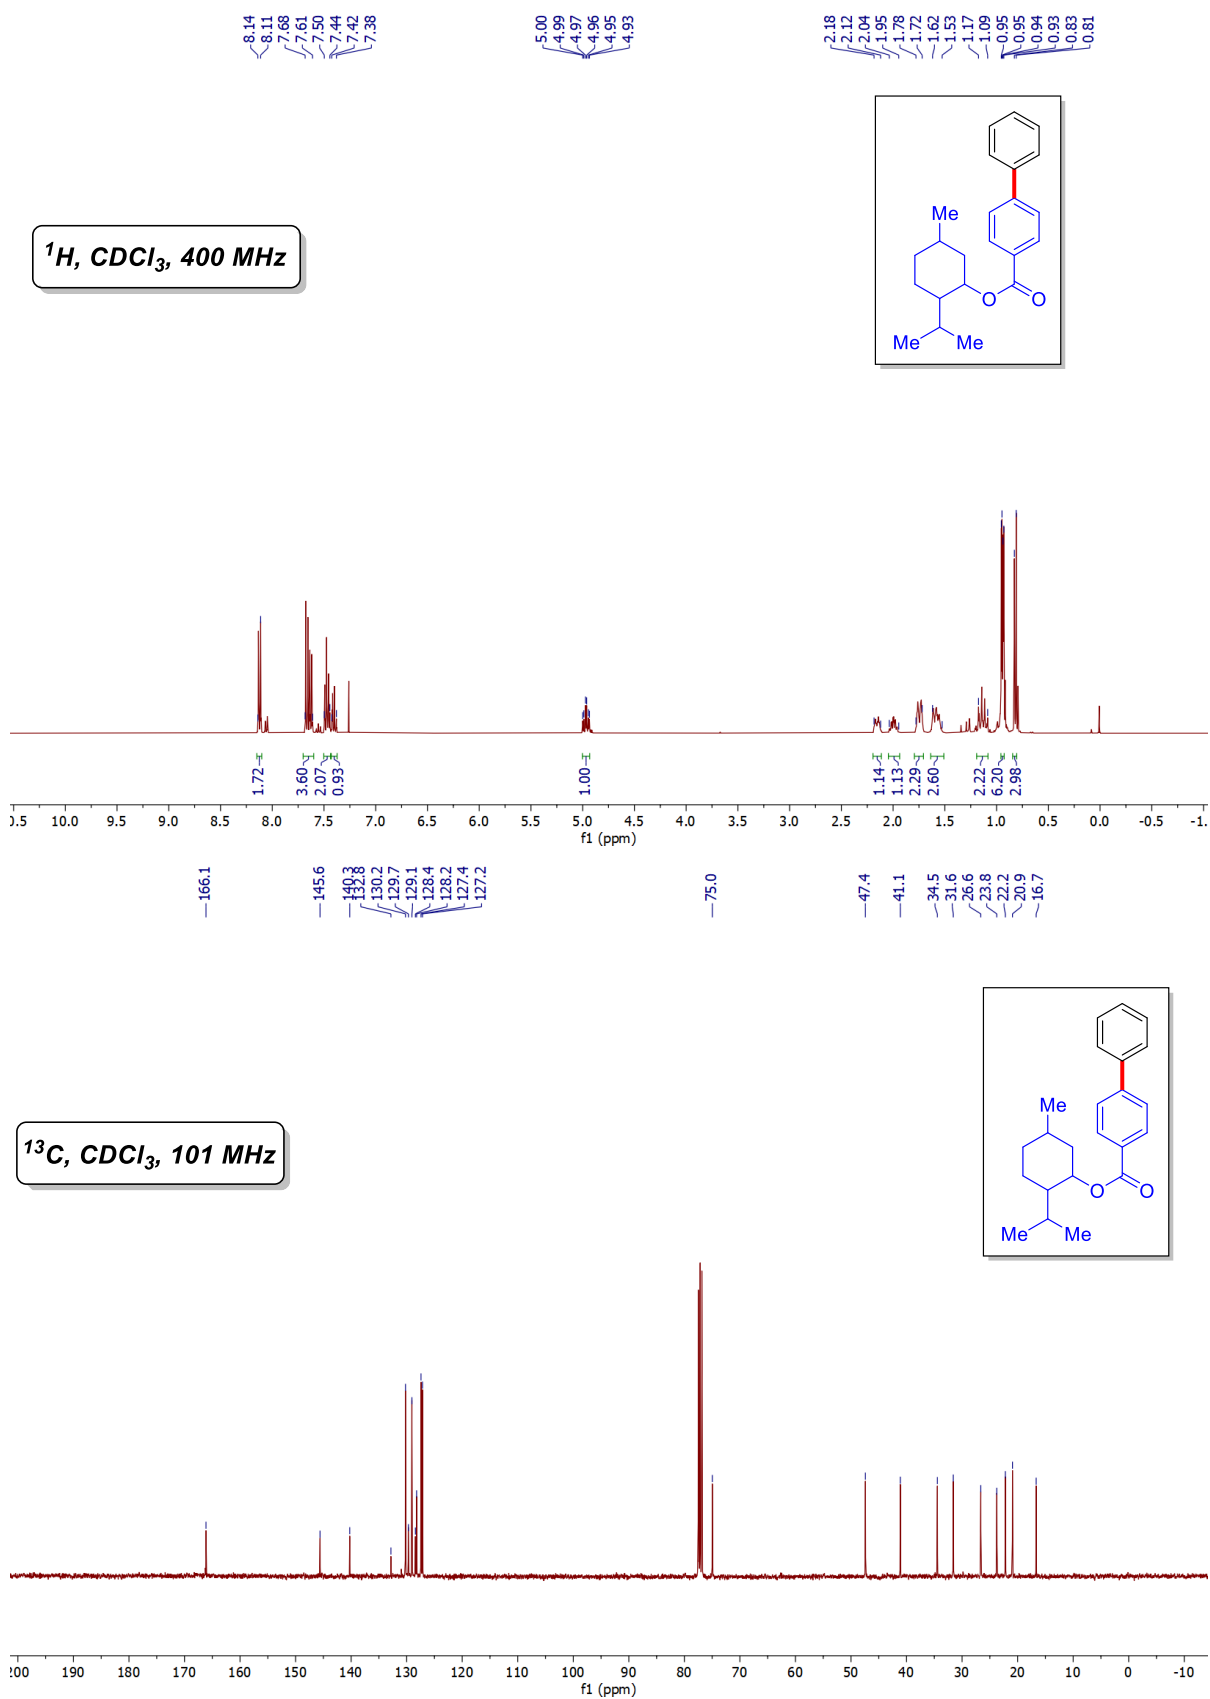

**(10R,13R)-10,13-dimethyl-17-((R)-6-methylheptan-2-yl)-2,3,4,7,8,9,10,11,12,13,14,15,16,17-tetradecahydro-1H-cyclopenta[a]phenanthren-3-yl [1,1'-biphenyl]-4-carboxylate (3ua)**

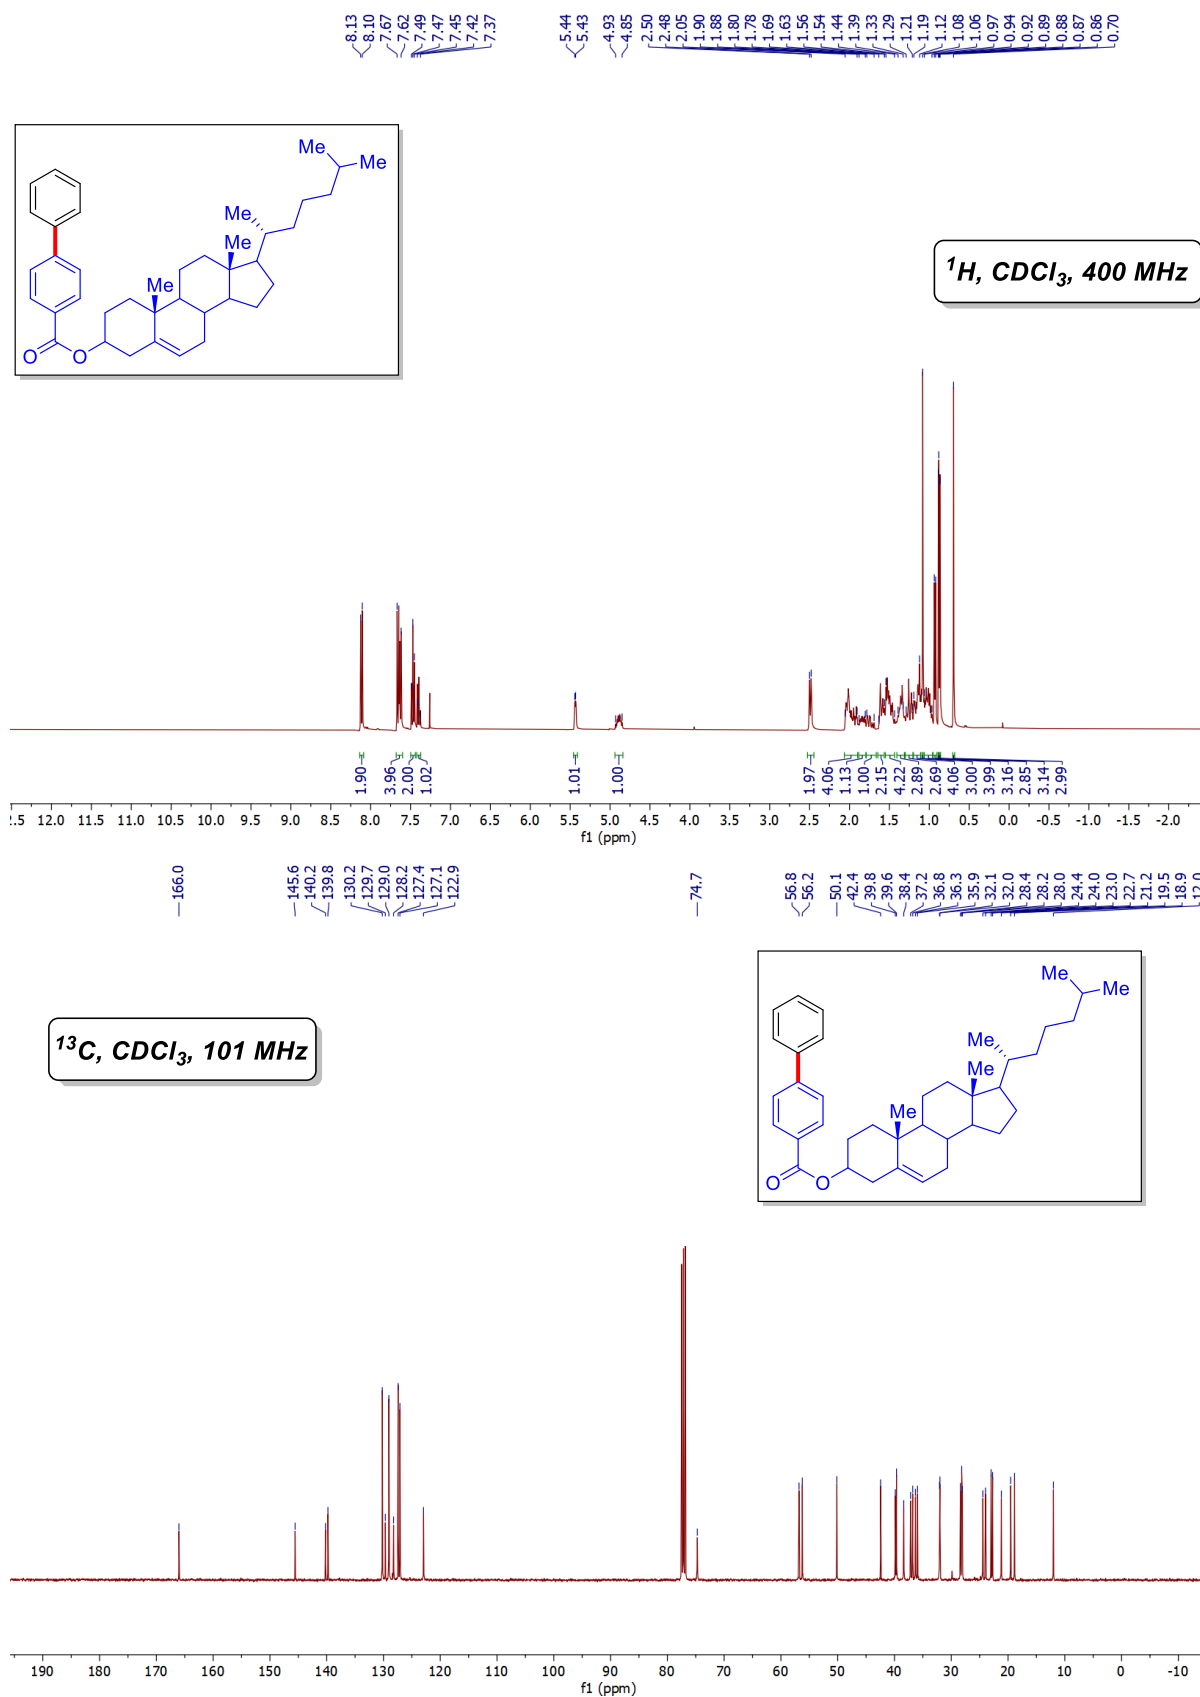



**(1*s*,4*R*,4'*S*,6*a*'*R*,6*b*'*S*,8*a*'*S*,8*b*'*R*,9'*S*,11*a*'*S*,12*a*'*S*,12*b*'*S*)-4,6*a*',8*a*',9'-tetramethyl-1',3',4',5',6',6*a*',6*b*',7',8',8*a*',8*b*',9',11*a*',12',12*a*',12*b*'-hexadecahydrospiro[cyclohexane-1,10'-naphtho[2,1':4,5]indeno[2,1-*b*]furan]-4'-yl [1,1'-biphenyl]-4-carboxylate (3*va*)**

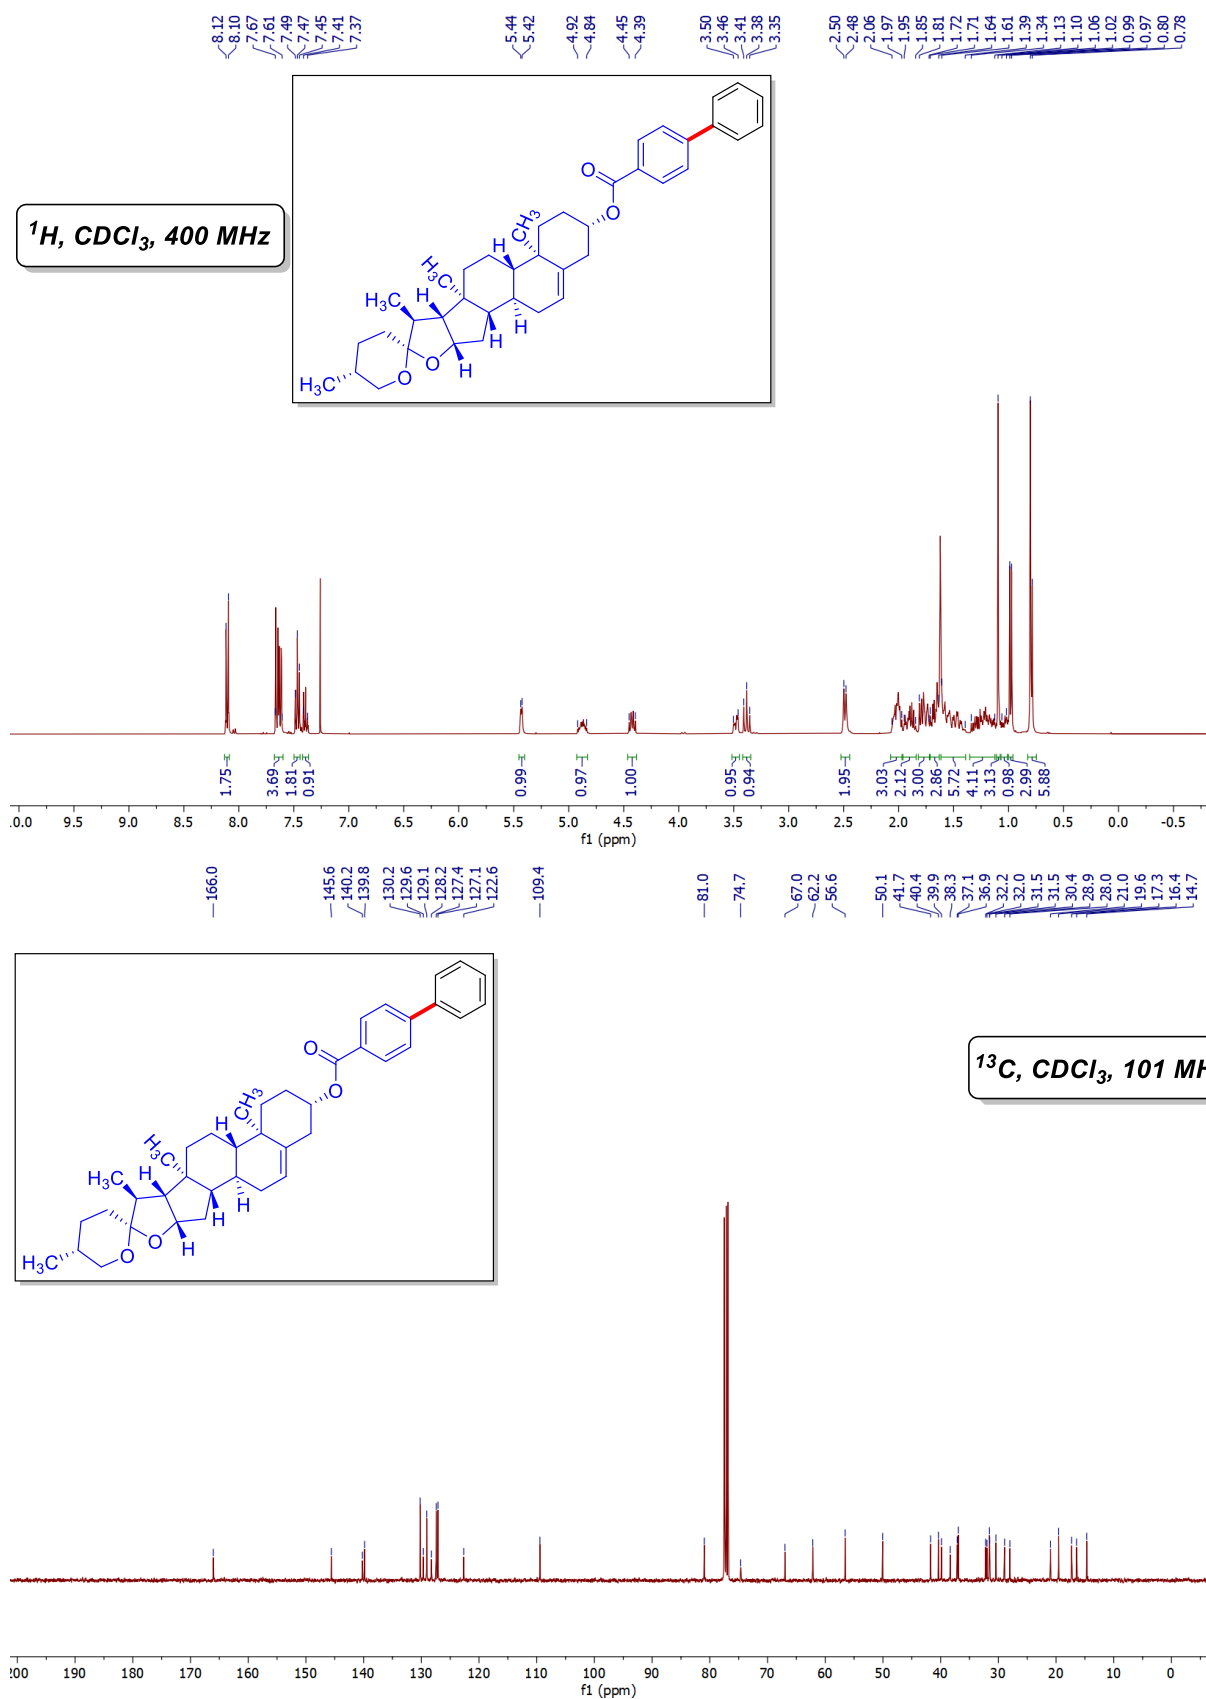

(2R)-2,5,7,8-tetramethyl-2-(4,8,12-trimethyltridecyl)chroman-6-yl [1,1'-biphenyl]-4-carboxylate (Vitamin E) (3wa)

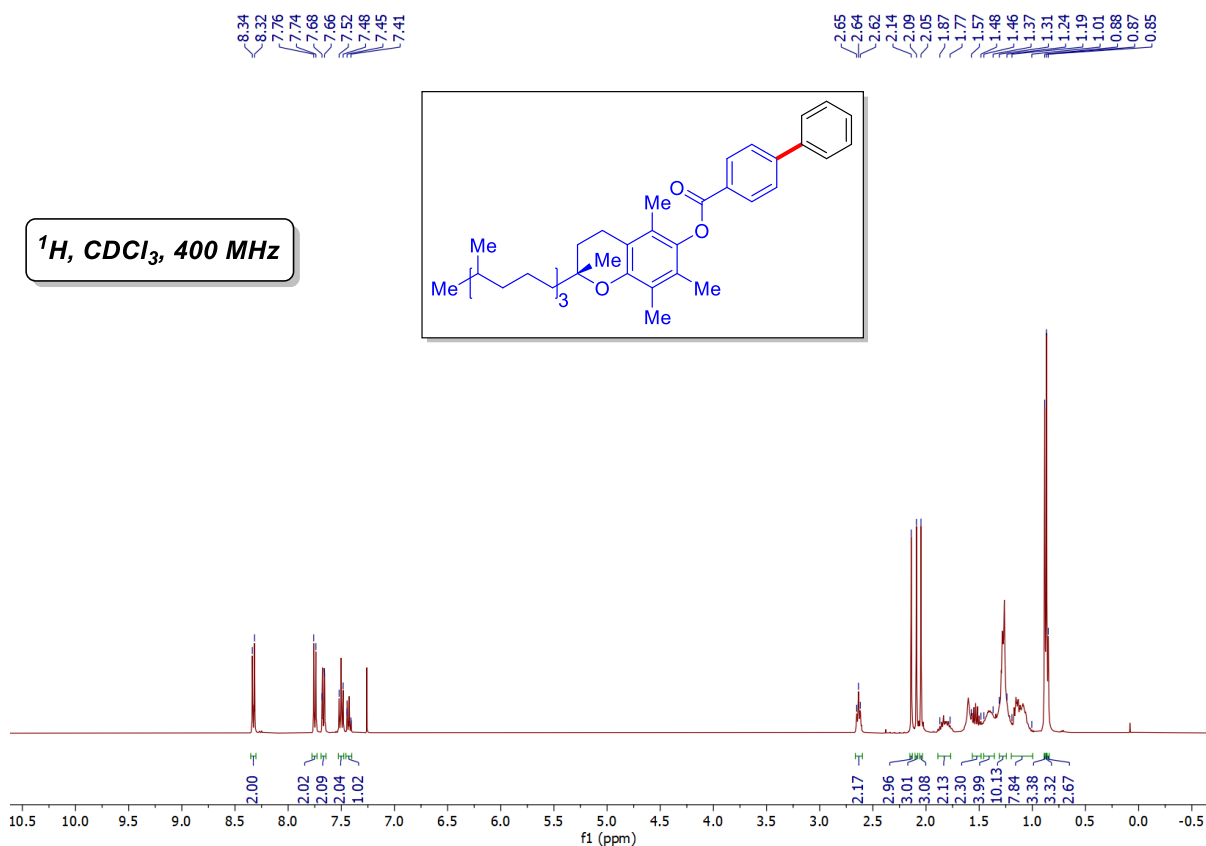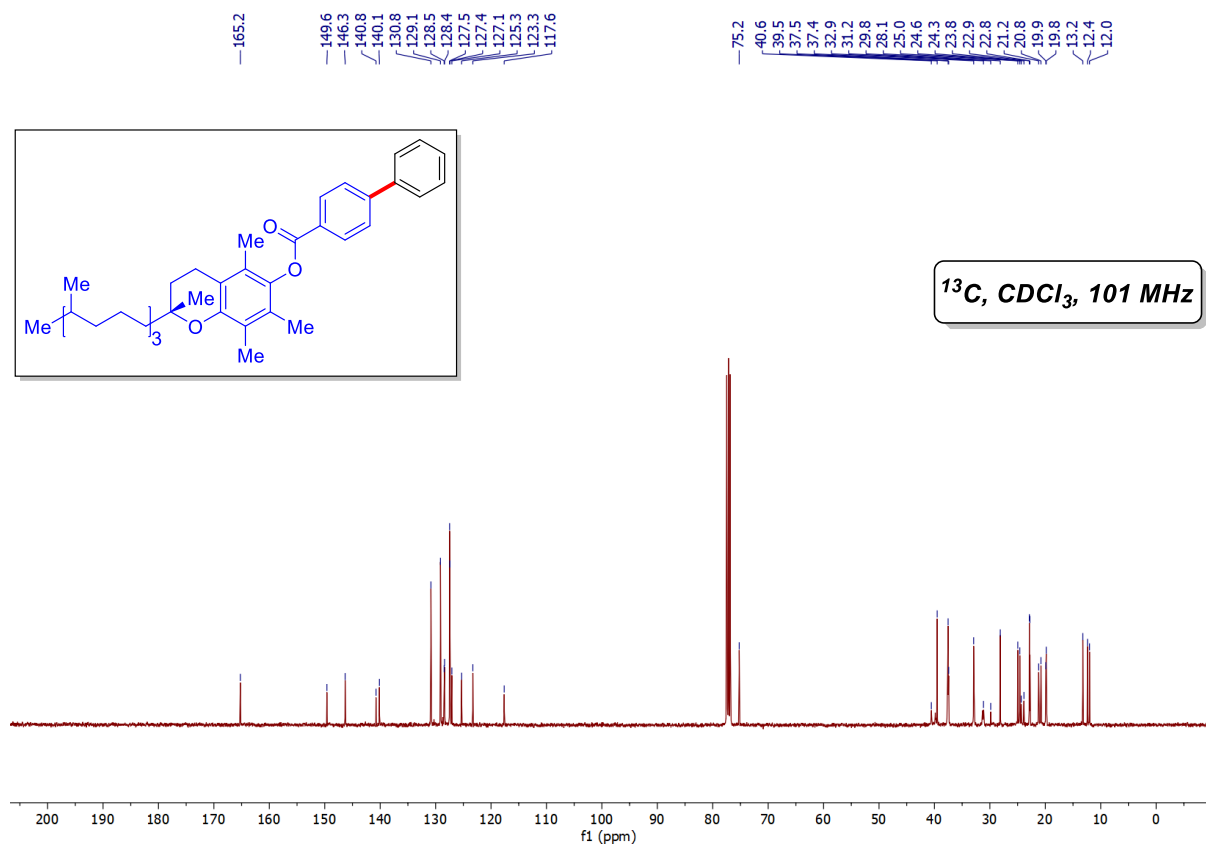

**10. References:**

- [1] M. A. Cismesiaa and T. P. Yoon, *Chem. Sci.*, 2015, **6**, 5426–5434.
- [2] S. Roy and I. Chatterjee, *ACS Org. Inorg. Au.*, 2022, **2**, 306–311.
- [3] L. M. Klingensmith, E. R. Strieter, T. E. Barder and S. L. Buchwald, *Organometallics*, 2006, **25**, 82.
- [4] S. Tyerman, D. G. MacKay, K. F. Clark, A. R. Kennedy, C. M. Robertson, L. Evans, R. M. Edkins and J. A. Murphy, *ACS Catal.*, 2025, **15**, 917–927.
- [5] D. Kurandina, M. Parasram and V. Gevorgyan, *Angew. Chem., Int. Ed.*, 2017, **56**, 14212–14216.
- [6] R. Kancherla, K. Muralirajan and M. Rueping, *Chem. Sci.*, 2022, **13**, 8583–8589.
- [7] V. V. Pavlishchuk and A. W. Addison, *Inorg. Chim. Acta*, 2000, **298**, 97–102.
- [8] N. Pootheri and S. Lee, *Adv. Synth. Catal.*, 2023, **365**, 3950–3957.
- [9] C. Pinilla, M. García-Zarza and A. C. Albéniz, *Org. Chem. Front.*, 2025, **12**, 467–477.
- [10] S. B. Hong and L. C. Liang, *RSC Adv.*, 2022, **12**, 28862–28866.
- [11] H. Pan, N. Wang and G. W. Wang, *Chem. Commun.*, 2025, **61**, 8184–8187.
- [12] T. Wasiak, D. Lukowiec, S. Waclawek, J. Kubacki and D. Janas, *Nano-Struct. Nano-Objects.*, 2023, **36**, No. 101052.
- [13] S. Sapra, S. Kumar and B. K. Singh *Org. Biomol. Chem.*, 2025, **23**, 2590–2596.
- [14] Z. X. Zhao, Z. L. Hu, S. C. Yu and Q. X. Liu, *New J. Chem.*, 2018, **42**, 13329–13338.
- [15] Y. Q. Liu, R. Yang, H. Li, T. P. Loh and M. Z. Lu, *Org. Lett.*, 2025, **27**, 4140–4145.
- [16] Y. Y. Cui, J. H. Na, M. M. Guo, J. Y. Huang, X. Q. Chu, W. Rao and Z. L. Shen, *Tetrahedron Lett.*, 2022, **92**, 153662.
- [17] M. Gholinejad, M. Eskandari and J. M. Sansano, *J. Mol. Struct.*, 2025, **1328**, 141364.
- [18] Z. Q. Guo, H. Xu, X. Wang, Z. Y. Wang, B. Ma and H. X. Dai, *Chem. Commun.*, 2021, **57**, 9716–9719.
- [19] P. Leowanawat, N. Zhang, A. M. Resmerita, B. M. Rosen and V. Percec, *J. Org. Chem.*, 2011, **76**, 9946.

- [20] B. M. Rosen, C. Huang and V. Percec, *Org. Lett.*, 2008, **10**, 2597.
- [21] S. Witzel, J. Xie, M. Rudolph and A. S. K. Hashmi, *Adv. Synth. Catal.*, 2017, **359**, 1522.
- [22] M. R. Yadav, M. Nagaoka, M. Kashiara, R. L. Zhong, T. Miyazaki, S. Sakaki and Y. Nakao, *J. Am. Chem. Soc.*, 2017, **139**, 9423–9426.
- [23] J. Malineni, R. L. Jezorek, N. Zhang and V. Percec, *Synthesis*, 2016, **48**, 2795.
- [24] Y. X. Luan, T. Zhang, W. W. Yao, K. Lu, L. Y. Kong, Y. T. Lin and M. Ye, *J. Am. Chem. Soc.*, 2017, **139**, 1786–1789.
- [25] R. J. Tang, Q. He and L. Yang, *Chem. Commun.*, 2015, **51**, 5925.
- [26] J. Tan, X. Gu, H. Dai, Y. Song, Z. Huang and Y. Zhao, *Tetrahedron Lett.*, 2024, **143**, 155130.
- [27] N. Ding and Z. Li, *Org. Lett.*, 2020, **22**, 4276–4282.
- [28] Y. X. Liu, D. Xue, J. D. Wang, C. J. Zhao, Q. Z. Zou, C. Wang and J. L. Xiao, *Synlett*, 2013, **24**, 507–513.
- [29] M. D. Perretti, D. M. Monzon, F. P. Crisostomo, V. S. Martin and R. Carrillo, *Chem. Commun.*, 2016, **52**, 9036.
- [30] P. Leowanawat, N. Zhang, A.-M. Resmerita, B. M. Rosen and V. Percec, *J. Org. Chem.*, 2011, **76**, 9946.
- [31] X. Huang, X. Li, M. Zou, S. Song, C. Tang, Y. Yuan and N. Jiao, *J. Am. Chem. Soc.*, 2014, **136**, 14858.
- [32] V. J. Roy, J. Chakraborty and S. R. Roy, *Org. Lett.*, 2024, **26**, 183–187.
